# Supplementary material for: Zircon of Triassic Age in the Stuttgart Formation (Schilfsandstein)—Witness of Tephra Fallout in the Central European Basin and New Constraints on the Mid-Carnian Episode
Source: Frontiers journal article supplement (doi:10.3389/feart.2021.778820), 2021-12-15
Supplement: Table_1.DOCX [file Table_1.DOCX]

**Table S2**

**(a) Operating conditions for the LA-ICP-SF-MS equipment for U-Th-Pb isotope analysis**

| **Laboratory & Sample Preparation** |  |
| --- | --- |
| Laboratory name | Institute for Geosciences, Goethe University Frankfurt, Germany |
| Sample type/mineral | detrital zircons |
| Sample preparation | Conventional mineral separation, 1 inch resin mount polished |
| Imaging | TESCAN VEGA2 SBH with Oxford SwiftED EDX-system, 15 kV, <10nA |
| **Laser ablation system** |  |
| Make, Model & type | ComPexPro 102F, Coherent (Excimer) |
| Ablation cell | Two-volume ablation cell (Laurin Technic, Australia) |
| Laser wavelength | 193 nm |
| Pulse width | < 5 ns |
| Fluence | 2.8 J/cm-2 |
| Repetition rate | 5.5 Hz |
| Spot size | 26 µm |
| Sampling mode / pattern | single spot |
| Carrier gas | 0.33 l/min He, 0.89 l/min Ar, N2 (6 ml) |
| Background collection | 20 seconds |
| Ablation duration | 16 seconds |
| Pre-ablation | 3 pulses |
| Wash-out delay | 10 seconds |
| Cell carrier gas flow (He) | 0.33 l/min |
| **ICP-MS Instrument** |  |
| Make, Model & type | Thermo-Scientific ELEMENT XR (sector field) |
| Sample introduction | via conventional tubing |
| RF power | 1325 W |
| Sampler, skimmer cones | Ni |
| Extraction lenses | X type |
| Make-up gas flow (Ar) | 0.89 l/min |
| Detection system | single collector secondary electron multiplier |
| Data acquisition protocol | Time-resolved analysis |
| Scanning mode | Peak hopping, four point per peak |
| Detector mode | Pulse counting mode |
| Masses measured | 202Hg,204(Hg + Pb), 206Pb, 207Pb, 208Pb, 232Th, 238U |
| Integration time per peak | 10 milliseconds |
| Sensitivity / Efficiency | ca. 9900 cps/ppm Pb (26 µm, 5.5Hz) |
| **Data Processing** |  |
| Gas blank | 16 seconds on-peak |
| Calibration strategy | GJ1 zircon standard used as primary reference material, Plešovice, and BB used as secondary reference material (quality control) |
| Reference Material info | GJ1 (Jackson et al., 2004 : 604 ± 1 Ma; 206Pb/238U age)  Plešovice (Slama et al., 2008: 337.13 ± 0.37 Ma ; Concordia age)  BB (Santos et al., 2017: 562 ± 9 Ma; 206Pb/238U age) |
| Data processing package used | in-house EXCEL spreadsheet (Gerdes & Zeh, 2006, 2009) |
| Quality control / Validation | Plešovice (session1): concordia age = 337.9 ± 1.1 Ma (n=26; MSWD=0.97; probability=0.52)  Plešovice (session2): concordia age = 337.8 ± 2.3 Ma (n=10; MSWD=0.77; probability=0.75)  BB (session 1-grain GUF): concordia age = 563.5 ± 2.5 Ma (n=10; MSWD=0.89; probability=0.60),  BB (session2-grain KIT): concordia age = 561.1 ± 1.2 (n=38; MSWD=1.08; probability=0.32) |

Gerdes, A., Zeh, A., 2006. Combined U–Pb and Hf isotope LA-(MC-)ICP-MS analyses of detrital zircons: Comparison with SHRIMP and new constraints for the provenance and age of an Armorican metasediment in Central Germany. Earth Planet. Sci. Lett. 249, 47–61. doi:10.1016/j.epsl.2006.06.039

Gerdes, A., Zeh, A., 2009. Zircon formation versus zircon alteration – new insights from combined U–Pb and Lu–Hf in-situ LA-ICP-MS analyses, and consequences for the interpretation of Archean zircon from the Central Zone of the Limpopo Belt. Chem. Geol. 261, 230–243.

Jackson, S.E., Pearson, N.J., Griffin, W.L., Belousova, E.A., 2004. The application of laser ablation-inductively coupled plasma-mass spectrometry to in situ U–Pb zircon geochronology. Chem. Geol. 211, 47–69. doi:10.1016/j.chemgeo.2004.06.017

Sláma, J., Košler, J., Condon, D.J., Crowley, J.L., Gerdes, A., Hanchar, J.M., Horstwood, M.S.A., Morris, G.A., Nasdala, L., Norberg, N., Schaltegger, U., Schoene, B., Tubrett, M.N., Whitehouse, M.J., 2008. Plešovice zircon — A new natural reference material for U–Pb and Hf isotopic microanalysis. Chem. Geol. 249, 1–35. doi:10.1016/j.chemgeo.2007.11.005

Santos, M.M., Lana, C., Scholz, R., Buick, I., Schmitz, M.D., Kamo, S.L., Gerdes, A., Corfu, F., Tapster, S., Lancaster, P., Storey, C.D., Basei, M.A.S., Tohver, E., Alkmim, A., Nalini, H., Krambrock, K., Fantini, C., Wiedenbeck, M., 2017. A new appraisal of Sri Lankan BB zircon as a reference material for LA–ICP–MS U–Pb geochronology and Lu–Hf isotope tracing. Geostandards and Geoanalytical Research 41, 335–358.
