# Supplementary material for: Zircon of Triassic Age in the Stuttgart Formation (Schilfsandstein)—Witness of Tephra Fallout in the Central European Basin and New Constraints on the Mid-Carnian Episode
Source: Frontiers journal article supplement (doi:10.3389/feart.2021.778820), 2021-12-15
Supplement: Table_2.XLS [file Table_2.XLS]

## Sheet: PlotDat15
Source sheet	Table S2	0.7309	0.09053	0.711955	0.0882198	0.72042	0.0890642	0.728927	0.0899092	0.737476	0.0907549	0.746067	0.0916012	0.754701	0.0924482	0.763377	0.0932959	0.708235	0.088	0.709822	0.088	0.706656	0.088	0.702025	0.087376	0.742478	0.0916426	0.742907	0.0912947	0.751212	0.0920683	0.742647	0.0914441	0.749754	0.0924381	0.74303	0.0916605	0.736904	0.0912185	0.737205	0.0913651	0.756518	0.0929554	0.750612	0.0921609	0.739251	0.0915761	0.745766	0.0924066
Plot name	Concordia0	0.7309	0.09018	0.711922	0.0882448	0.720387	0.0890894	0.728893	0.0899347	0.737441	0.0907807	0.746032	0.0916273	0.754665	0.0924745	0.763341	0.0933224	0.708235	0.088	0.710162	0.088034	0.708235	0.0881588	0.710427	0.0882198	0.742311	0.0917253	0.742782	0.0913723	0.751082	0.0921533	0.742478	0.0915268	0.749586	0.0925131	0.74291	0.0917338	0.736739	0.0913015	0.737048	0.0914403	0.756353	0.0930293	0.750486	0.0922394	0.739131	0.0916503	0.745602	0.0924813
Plot Type	1	0.7387	0.09096	0.711823	0.0882688	0.720286	0.0891136	0.728791	0.0899592	0.737338	0.0908053	0.745928	0.0916522	0.754559	0.0924997	0.763234	0.0933478	0.710162	0.0881932	0.712091	0.0882269	0.710162	0.0883523	0.718871	0.0890642	0.741832	0.0917754	0.742425	0.0914268	0.750711	0.0922151	0.741992	0.0915763	0.749105	0.0925538	0.742567	0.0917844	0.736267	0.0913525	0.736597	0.0914841	0.755881	0.0930699	0.750127	0.0922945	0.738791	0.0917021	0.745132	0.0925226
1st free col	91	0.7309	0.09031	0.711664	0.0882906	0.720124	0.0891357	0.728627	0.0899814	0.737172	0.0908278	0.745759	0.0916749	0.754388	0.0925226	0.76306	0.0933709	0.712091	0.0883864	0.714022	0.0884198	0.712091	0.0885459	0.727356	0.0899092	0.741055	0.0917915	0.741845	0.0914569	0.750106	0.0922525	0.741204	0.0915913	0.748323	0.0925593	0.74201	0.0918114	0.735502	0.0913701	0.735865	0.0914953	0.755116	0.0930762	0.749541	0.0923253	0.738237	0.0917305	0.74437	0.0925295
Sigma Level	2	0.7381	0.09126	0.71145	0.0883093	0.719908	0.0891546	0.728407	0.0900005	0.736949	0.0908471	0.745533	0.0916943	0.754159	0.0925422	0.762828	0.0933908	0.714022	0.0885797	0.715955	0.0886127	0.714022	0.0887396	0.735883	0.0907549	0.740002	0.0917732	0.741051	0.0914622	0.749279	0.0922647	0.740135	0.0915713	0.747263	0.0925294	0.741248	0.0918142	0.734464	0.0913539	0.734873	0.0914737	0.754077	0.093048	0.74874	0.092331	0.73748	0.0917349	0.743336	0.0925018
Absolute Errs	FALSE	0.7315	0.09057	0.711191	0.0883241	0.719646	0.0891695	0.728141	0.0900156	0.736679	0.0908623	0.745259	0.0917097	0.753882	0.0925578	0.762547	0.0934065	0.715955	0.088773	0.717891	0.0888057	0.715955	0.0889332	0.744452	0.0916012	0.7387	0.091721	0.74006	0.0914425	0.748246	0.0922516	0.738814	0.0915169	0.745952	0.0924648	0.740296	0.0917928	0.733182	0.0913044	0.733646	0.0914198	0.752793	0.0929859	0.74774	0.0923115	0.736535	0.0917153	0.742057	0.0924402
Symbol Type	1	0.7255	0.09013	0.7109	0.0883344	0.71935	0.0891799	0.727841	0.0900261	0.736375	0.0908729	0.744951	0.0917204	0.753569	0.0925685	0.76223	0.0934173	0.717891	0.0889663	0.719828	0.0889987	0.717891	0.0891269	0.753063	0.0924482	0.737185	0.0916363	0.73889	0.0913983	0.747027	0.0922133	0.737277	0.0914296	0.744428	0.0923674	0.739173	0.0917476	0.73169	0.0912228	0.73222	0.091335	0.751299	0.0928918	0.746561	0.0922674	0.735419	0.091672	0.74057	0.0923464
Inverse Plot	FALSE	0.7263	0.09029	0.710587	0.0883396	0.719033	0.0891852	0.72752	0.0900314	0.736049	0.0908783	0.744621	0.0917258	0.753234	0.092574	0.76189	0.0934229	0.719828	0.0891597	0.721768	0.0891917	0.719828	0.0893206	0.761717	0.0932959	0.735499	0.0915214	0.737565	0.0913304	0.745646	0.0921506	0.735566	0.0913118	0.74273	0.0922397	0.7379	0.0916795	0.730029	0.0911114	0.730631	0.0912218	0.749636	0.0927682	0.745224	0.0921993	0.734156	0.091606	0.738915	0.092223
Color Plot	TRUE	0.7451	0.09181	0.710268	0.0883396	0.718709	0.0891852	0.727191	0.0900314	0.735716	0.0908783	0.744283	0.0917258	0.752892	0.092574	0.761543	0.0934229	0.721768	0.0893531	0.72371	0.0893848	0.721768	0.0895144	IsoLine	IsoLine	0.733687	0.0913795	0.73611	0.09124	0.74413	0.0920647	0.733728	0.0911666	0.740907	0.0920853	0.736503	0.0915898	0.728244	0.0909732	0.728925	0.0910831	0.74785	0.0926185	0.743756	0.0921087	0.732768	0.0915184	0.737137	0.0920733
3D plot	FALSE	0.7385	0.09104	0.709955	0.0883344	0.718392	0.0891799	0.72687	0.0900261	0.73539	0.0908729	0.743952	0.0917204	0.752557	0.0925685	0.761204	0.0934173	0.72371	0.0895465	0.725654	0.0895779	0.72371	0.0897082			0.731799	0.0912144	0.734554	0.0911291	0.742509	0.0919573	0.731813	0.090998	0.739007	0.0919085	0.735009	0.0914802	0.726385	0.090812	0.727147	0.0909228	0.745988	0.0924466	0.742186	0.0919973	0.731284	0.0914109	0.735283	0.0919015
Linear	FALSE	0.7278	0.0905	0.709663	0.0883241	0.718096	0.0891695	0.72657	0.0900156	0.735086	0.0908623	0.743644	0.0917097	0.752244	0.0925578	0.760886	0.0934065	0.725654	0.08974	0.7276	0.0897711	0.725654	0.089902			0.729887	0.0910306	0.732927	0.0909996	0.740813	0.0918305	0.729873	0.0908107	0.737082	0.0917139	0.733446	0.091353	0.724502	0.0906322	0.725346	0.0907452	0.744103	0.0922575	0.740545	0.0918672	0.729732	0.0912858	0.733406	0.0917121
Data Range	AC600:AG630	0.7344	0.09126	0.709405	0.0883093	0.717834	0.0891546	0.726304	0.0900005	0.734816	0.0908471	0.743371	0.0916943	0.751967	0.0925422	0.760606	0.0933908	0.7276	0.0899335	0.729549	0.0899642	0.7276	0.0900959			0.728002	0.0908332	0.73126	0.0908542	0.739076	0.0916868	0.72796	0.0906098	0.735185	0.0915069	0.731845	0.0912104	0.722646	0.0904387	0.723571	0.0905553	0.742244	0.0920561	0.738863	0.091721	0.728142	0.0911454	0.731556	0.0915104
Filled Symbols	FALSE	0.728	0.09024	0.709191	0.0882906	0.717617	0.0891357	0.726084	0.0899814	0.734593	0.0908278	0.743145	0.0916749	0.751738	0.0925226	0.760373	0.0933709	0.729549	0.090127	0.731499	0.0901574	0.729549	0.0902898			0.726197	0.0906275	0.729586	0.0906957	0.737331	0.0915289	0.726128	0.0904006	0.733367	0.0912932	0.730238	0.0910555	0.720867	0.0902368	0.72187	0.090358	0.740464	0.091848	0.737175	0.0915616	0.726546	0.0909924	0.729784	0.0913018
ConcAge	TRUE	0.7428	0.0917	0.709031	0.0882688	0.717455	0.0891136	0.72592	0.0899592	0.734427	0.0908053	0.742976	0.0916522	0.751567	0.0924997	0.7602	0.0933478	0.731499	0.0903206	0.733452	0.0903507	0.731499	0.0904837			0.72452	0.0904191	0.727938	0.0905272	0.735614	0.09136	0.724427	0.090189	0.731679	0.0910786	0.728655	0.090891	0.719215	0.090032	0.72029	0.090159	0.738809	0.0916389	0.735512	0.0913921	0.724974	0.0908298	0.728137	0.0910922
ConcSwap	FALSE	0.727	0.09041	0.708933	0.0882448	0.717355	0.0890894	0.725819	0.0899347	0.734324	0.0907807	0.742871	0.0916273	0.751461	0.0924745	0.760092	0.0933224	0.733452	0.0905142	0.735407	0.090544	0.733452	0.0906777			0.723016	0.0902138	0.726347	0.0903519	0.733956	0.0911833	0.722901	0.0899807	0.730166	0.090869	0.727128	0.0907204	0.717735	0.0898299	0.718874	0.0899635	0.737327	0.0914344	0.733908	0.0912156	0.723458	0.0906608	0.726661	0.0908871
1st Symbol-row	1	0.7348	0.09089	0.708899	0.0882198	0.717321	0.0890642	0.725784	0.0899092	0.734289	0.0907549	0.742836	0.0916012	0.751425	0.0924482	0.760056	0.0932959	0.735407	0.0907078	0.737365	0.0907373	0.735407	0.0908717			0.721728	0.0900171	0.724846	0.0901732	0.732391	0.0910022	0.721594	0.0897814	0.728869	0.09067	0.725686	0.0905468	0.716466	0.0896359	0.717661	0.0897769	0.736056	0.0912402	0.732392	0.0910358	0.722025	0.0904886	0.725396	0.0906921
		0.737	0.09174	0.708933	0.0881947	0.717355	0.0890389	0.725819	0.0898836	0.734324	0.0907291	0.742871	0.0915752	0.751461	0.0924219	0.760092	0.0932693	0.737365	0.0909015	0.739324	0.0909306	0.737365	0.0910658			0.72069	0.0898344	0.723461	0.0899947	0.730949	0.0908203	0.720541	0.0895965	0.727824	0.0904871	0.724357	0.0903736	0.715444	0.0894554	0.716684	0.0896043	0.735032	0.0910615	0.730996	0.090856	0.720705	0.0903167	0.724377	0.0905127
		0.7394	0.09189	0.709031	0.0881708	0.717455	0.0890147	0.72592	0.0898592	0.734427	0.0907044	0.742976	0.0915503	0.751567	0.0923968	0.7602	0.0932439	0.739324	0.0910952	0.741286	0.091124	0.739324	0.0912598			0.719931	0.0896707	0.722222	0.0898198	0.729657	0.0906411	0.71977	0.089431	0.727059	0.0903253	0.723167	0.0902043	0.714696	0.0892934	0.715968	0.0894504	0.734283	0.0909033	0.729746	0.0906799	0.719523	0.0901484	0.723632	0.0903537
		0.7394	0.0912	0.709191	0.088149	0.717617	0.0889926	0.726084	0.089837	0.734593	0.0906819	0.743145	0.0915276	0.751738	0.0923739	0.760373	0.0932208	0.741286	0.091289	0.74325	0.0913174	0.741286	0.0914539			0.71947	0.0895304	0.721152	0.0896518	0.728541	0.0904681	0.719303	0.0892895	0.726595	0.090189	0.722139	0.0900421	0.714243	0.0891541	0.715535	0.0893194	0.733829	0.0907698	0.728666	0.0905107	0.718503	0.0899869	0.72318	0.0902193
		0.7309	0.0909	0.709405	0.0881302	0.717834	0.0889737	0.726304	0.0898179	0.734816	0.0906627	0.743371	0.0915081	0.751967	0.0923542	0.760606	0.093201	0.74325	0.0914827	0.745216	0.0915108	0.74325	0.0916481			0.719322	0.0894174	0.720271	0.0894942	0.727624	0.0903047	0.719153	0.0891759	0.726446	0.0900819	0.721293	0.0898901	0.714096	0.0890415	0.715395	0.0892149	0.733682	0.0906646	0.727778	0.0903518	0.717663	0.0898353	0.723034	0.0901134
		0.7368	0.09114	0.709663	0.0881154	0.718096	0.0889588	0.72657	0.0898028	0.735086	0.0906474	0.743644	0.0914927	0.752244	0.0923387	0.760886	0.0931853	0.745216	0.0916765	0.747184	0.0917043	0.745216	0.0918423			0.719489	0.0893347	0.719597	0.0893499	0.726921	0.0901541	0.719322	0.0890932	0.726614	0.0900069	0.720646	0.0897514	0.714261	0.0889585	0.715552	0.0891397	0.733847	0.0905907	0.727098	0.0902064	0.71702	0.0896968	0.723198	0.0900387
		0.7414	0.09152	0.709955	0.0881052	0.718392	0.0889484	0.72687	0.0897923	0.73539	0.0906369	0.743952	0.0914821	0.752557	0.0923279	0.761204	0.0931744	0.747184	0.0918704	0.749155	0.0918978	0.747184	0.0920365			0.719968	0.0892846	0.719143	0.0892218	0.726448	0.0900191	0.719808	0.0890437	0.727095	0.0899662	0.72021	0.0896287	0.714733	0.0889075	0.716003	0.0890959	0.734319	0.0905501	0.72664	0.0900771	0.716588	0.0895738	0.723668	0.0899974
		0.7305	0.09027	0.710268	0.0881	0.718709	0.0889431	0.727191	0.089787	0.735716	0.0906315	0.744283	0.0914766	0.752892	0.0923224	0.761543	0.0931689	0.749155	0.0920643	0.751128	0.0920914	0.749155	0.0922307			0.720745	0.0892685	0.718918	0.0891124	0.726214	0.0899025	0.720596	0.0890287	0.727877	0.0899607	0.719994	0.0895242	0.715498	0.0888899	0.716735	0.0890847	0.735084	0.0905438	0.726413	0.0899666	0.716373	0.0894689	0.72443	0.0899905
		0.7315	0.09081	0.710587	0.0881	0.719033	0.0889431	0.72752	0.089787	0.736049	0.0906315	0.744621	0.0914766	0.753234	0.0923224	0.76189	0.0931689	0.751128	0.0922582	0.753103	0.092285	0.751128	0.092425			0.721798	0.0892868	0.718927	0.0890237	0.726222	0.0898064	0.721665	0.0890487	0.728937	0.0899906	0.720002	0.0894401	0.716536	0.0889061	0.717727	0.0891063	0.736123	0.090572	0.726421	0.089877	0.716381	0.0893841	0.725464	0.0900182
		0.7427	0.09127	0.7109	0.0881052	0.71935	0.0889484	0.727841	0.0897923	0.736375	0.0906369	0.744951	0.0914821	0.753569	0.0923279	0.76223	0.0931744	0.753103	0.0924521	0.75508	0.0924786	0.753103	0.0926193			0.7231	0.089339	0.719168	0.0889575	0.726474	0.0897328	0.722986	0.0891031	0.730248	0.0900552	0.720234	0.089378	0.717818	0.0889556	0.718954	0.0891602	0.737407	0.0906341	0.726665	0.08981	0.716611	0.0893209	0.726743	0.0900798
		0.7365	0.09108	0.711191	0.0881154	0.719646	0.0889588	0.728141	0.0898028	0.736679	0.0906474	0.745259	0.0914927	0.753882	0.0923387	0.762547	0.0931853	0.75508	0.0926461	0.75706	0.0926723	0.75508	0.0928137			0.724615	0.0894237	0.719638	0.0889151	0.726963	0.0896831	0.724523	0.0891904	0.731772	0.0901526	0.720685	0.0893391	0.71931	0.0890372	0.72038	0.089245	0.738901	0.0907282	0.727138	0.089767	0.717059	0.0892808	0.72823	0.0901736
		0.7389	0.09117	0.71145	0.0881302	0.719908	0.0889737	0.728407	0.0898179	0.736949	0.0906627	0.745533	0.0915081	0.754159	0.0923542	0.762828	0.093201	0.75706	0.0928401	0.759041	0.0928659	0.75706	0.093008			0.726301	0.0895386	0.720326	0.0888973	0.727681	0.0896582	0.726234	0.0893082	0.73347	0.0902803	0.721347	0.0893242	0.720971	0.0891486	0.721969	0.0893582	0.740564	0.0908518	0.727833	0.0897487	0.717717	0.0892643	0.729885	0.090297
		0.7379	0.09143	0.711664	0.088149	0.720124	0.0889926	0.728627	0.089837	0.737172	0.0906819	0.745759	0.0915276	0.754388	0.0923739	0.76306	0.0932208	0.759041	0.0930342	0.761025	0.0930597	0.759041	0.0932025			0.728113	0.0896805	0.721221	0.0889045	0.728613	0.0896587	0.728072	0.0894534	0.735293	0.0904347	0.722206	0.0893335	0.722756	0.0892868	0.723675	0.0894969	0.74235	0.0910015	0.728736	0.0897556	0.71857	0.0892719	0.731663	0.0904467
		0.7353	0.0909	0.711823	0.0881708	0.720286	0.0890147	0.728791	0.0898592	0.737338	0.0907044	0.745928	0.0915503	0.754559	0.0923968	0.763234	0.0932439	0.761025	0.0932283	0.763012	0.0932534	0.761025	0.0933969			0.730001	0.0898456	0.722304	0.0889365	0.729742	0.0896845	0.729987	0.089622	0.737193	0.0906115	0.723246	0.0893669	0.724615	0.089448	0.725453	0.0896572	0.744212	0.0911734	0.729828	0.0897875	0.719603	0.0893034	0.733517	0.0906185
		0.7396	0.09106	0.711922	0.0881947	0.720387	0.0890389	0.728893	0.0898836	0.737441	0.0907291	0.746032	0.0915752	0.754665	0.0924219	0.763341	0.0932693	0.763012	0.0934224	0.765	0.0934472	0.763012	0.0935914			0.731913	0.0900294	0.723554	0.0889928	0.731045	0.0897351	0.731927	0.0898093	0.739118	0.0908061	0.724446	0.0894237	0.726498	0.0896278	0.727254	0.0898348	0.746097	0.0913625	0.73109	0.0898437	0.720795	0.0893582	0.735394	0.0908079
		0.7344	0.09054	0.711955	0.0882198	0.72042	0.0890642	0.728927	0.0899092	0.737476	0.0907549	0.746067	0.0916012	0.754701	0.0924482	0.763377	0.0932959	0.765	0.0936166	0.765	0.0934472	0.765	0.0937859			0.733798	0.0902268	0.724948	0.0890721	0.732497	0.0898096	0.73384	0.0900102	0.741015	0.0910131	0.725784	0.0895028	0.728354	0.0898213	0.729029	0.0900247	0.747956	0.0915639	0.732495	0.0899233	0.722124	0.0894352	0.737244	0.0910096
		IsoLine	IsoLine	ConcTikEll	ConcTikEll	ConcTikEll	ConcTikEll	ConcTikEll	ConcTikEll	ConcTikEll	ConcTikEll	ConcTikEll	ConcTikEll	ConcTikEll	ConcTikEll	ConcTikEll	ConcTikEll	0.765	0.0936166	ConcBand	ConcBand	0.765	0.0937859			0.735603	0.0904325	0.726457	0.089173	0.734069	0.0899064	0.735672	0.0902194	0.742833	0.0912268	0.727234	0.0896026	0.730133	0.0900232	0.73073	0.090222	0.749736	0.091772	0.734018	0.0900246	0.723564	0.089533	0.739016	0.0912182
																		IsoLine	IsoLine			ConcBand	ConcBand			0.73728	0.0906409	0.728053	0.0892935	0.735732	0.0900238	0.737373	0.090431	0.744521	0.0914414	0.728766	0.0897213	0.731785	0.090228	0.73231	0.090421	0.751391	0.0919811	0.735627	0.0901456	0.725085	0.0896496	0.740663	0.0914278
																										0.738784	0.0908462	0.729704	0.0894312	0.737453	0.0901594	0.738899	0.0906393	0.746034	0.091651	0.730352	0.0898566	0.733265	0.0904301	0.733726	0.0906165	0.752873	0.0921856	0.737293	0.090284	0.72666	0.0897827	0.742139	0.0916329
																										0.740072	0.0910429	0.731378	0.0895836	0.739198	0.0903105	0.740206	0.0908386	0.747331	0.09185	0.731959	0.0900057	0.734534	0.0906241	0.734939	0.0908031	0.754144	0.0923798	0.738982	0.0904372	0.728257	0.0899298	0.743404	0.0918279
																										0.74111	0.0912256	0.733043	0.0897475	0.740933	0.0904744	0.741259	0.0910235	0.748376	0.0920329	0.733558	0.0901658	0.735556	0.0908046	0.735916	0.0909757	0.755168	0.0925585	0.740662	0.0906021	0.729845	0.0900879	0.744423	0.0920073
																										0.741869	0.0913893	0.734666	0.0899199	0.742625	0.0906476	0.74203	0.091189	0.749141	0.0921947	0.735117	0.0903337	0.736304	0.0909666	0.736632	0.0911296	0.755917	0.0927167	0.742299	0.0907755	0.731393	0.0902541	0.745168	0.0921663
																										0.74233	0.0915296	0.736216	0.0900973	0.74424	0.090827	0.742497	0.0913305	0.749605	0.092331	0.736606	0.0905063	0.736757	0.0911059	0.737065	0.0912606	0.756371	0.0928502	0.743863	0.0909541	0.732871	0.0904251	0.74562	0.0923007
																										0.742478	0.0916426	0.737663	0.0902763	0.745747	0.0910089	0.742647	0.0914441	0.749754	0.0924381	0.737995	0.0906801	0.736904	0.0912185	0.737205	0.0913651	0.756518	0.0929554	0.745322	0.0911343	0.73425	0.0905976	0.745766	0.0924066
																										Black	Black	0.738978	0.0904535	0.747118	0.0911899	Black	Black	Black	Black	0.739257	0.0908517	Black	Black	Black	Black	Black	Black	0.746649	0.0913127	0.735504	0.0907681	Black	Black
																												0.740136	0.0906253	0.748324	0.0913664					0.740369	0.0910179							0.747817	0.0914858	0.736608	0.0909334
																												0.741114	0.0907884	0.749343	0.091535					0.741308	0.0911754							0.748803	0.0916502	0.737541	0.0910903
																												0.741893	0.0909398	0.750155	0.0916924					0.742056	0.091321							0.749589	0.0918028	0.738284	0.0912357
																												0.742458	0.0910763	0.750744	0.0918355					0.742599	0.0914521							0.75016	0.0919405	0.738823	0.0913668
																												0.742798	0.0911954	0.751099	0.0919616					0.742926	0.091566							0.750503	0.0920606	0.739147	0.091481
																												0.742907	0.0912947	0.751212	0.0920683					0.74303	0.0916605							0.750612	0.0921609	0.739251	0.0915761
																												Black	Black	Black	Black					Black	Black							Black	Black	Black	Black
[truncated: 40 more columns]

## Sheet: PlotDat0
Source sheet	Table S2	0.7446	0.09217	0.703532	0.087376	0.72042	0.0890642	0.737476	0.0907549	0.754701	0.0924482	0.772097	0.0941442	0.7	0.0871721	0.7	0.0870149	0.7	0.0873294	0.702025	0.087376	0.756884	0.0934386	0.749998	0.0922169	0.749649	0.0923824	0.759363	0.0930277	0.756253	0.0926698	0.753686	0.0927495	0.753673	0.0918562	0.756651	0.0928964	0.758189	0.0928636	0.748619	0.0922164	0.754408	0.0923841	0.754653	0.0928731	0.756434	0.0927512	0.751502	0.0923917
Plot name	Concordia0	0.7338	0.09038	0.703471	0.0874097	0.720358	0.0890984	0.737412	0.0907898	0.754635	0.0924839	0.772028	0.0941805	0.7	0.0871721	0.7	0.0870149	0.7	0.0873294	0.718871	0.0890642	0.756707	0.0935138	0.749767	0.0922799	0.749452	0.0924483	0.759176	0.0930996	0.756067	0.0927593	0.753489	0.0928278	0.753474	0.0919469	0.756446	0.0929812	0.757993	0.0929492	0.748422	0.0922869	0.754206	0.0924937	0.754466	0.0929538	0.756265	0.0928304	0.751316	0.0924504
Plot Type	1	0.7359	0.09087	0.703293	0.0874405	0.720174	0.0891299	0.737223	0.090822	0.754441	0.0925166	0.771829	0.0942139	0.702672	0.0874411	0.702672	0.0872834	0.702672	0.0875989	0.735883	0.0907549	0.7562	0.0935523	0.749101	0.0922912	0.748885	0.0924712	0.758642	0.0931322	0.755536	0.0928125	0.752924	0.0928647	0.752905	0.0919981	0.755857	0.0930233	0.757432	0.0929949	0.747856	0.0923149	0.753627	0.0925663	0.753931	0.0929963	0.75578	0.092876	0.750781	0.0924683
1st free col	101	0.7464	0.09166	0.703012	0.0874662	0.719886	0.0891561	0.736926	0.0908486	0.754136	0.0925438	0.771516	0.0942416	0.705349	0.0877102	0.705349	0.0875519	0.705349	0.0878684	0.753063	0.0924482	0.755376	0.0935531	0.748017	0.0922503	0.747964	0.0924504	0.757773	0.0931247	0.754674	0.092828	0.752007	0.0928593	0.751982	0.0920085	0.754902	0.0930217	0.75652	0.0929997	0.746937	0.0922997	0.752687	0.0926001	0.753062	0.0929993	0.754993	0.0928868	0.74991	0.0924447
Sigma Level	2	0.7434	0.09143	0.702651	0.0874846	0.719514	0.0891748	0.736545	0.0908677	0.753743	0.0925633	0.771113	0.0942615	0.708029	0.0879793	0.708029	0.0878205	0.708029	0.0881381	0.770413	0.0941442	0.754258	0.0935162	0.746545	0.0921584	0.746714	0.0923865	0.756594	0.0930772	0.753504	0.0928054	0.750762	0.0928115	0.750729	0.0919777	0.753606	0.0929765	0.755284	0.0929632	0.74569	0.0922417	0.751413	0.092594	0.751884	0.0929628	0.753925	0.0928625	0.748728	0.0923804
Absolute Errs	FALSE	0.74	0.09131	0.70224	0.0874941	0.719091	0.0891846	0.736109	0.0908777	0.753296	0.0925734	0.770653	0.0942718	0.710714	0.0882485	0.710714	0.0880892	0.710714	0.0884078	IsoLine	IsoLine	0.752877	0.0934425	0.744726	0.0920179	0.745169	0.0922812	0.755137	0.0929911	0.752059	0.0927452	0.749223	0.0927228	0.74918	0.0919066	0.752003	0.0928887	0.753756	0.0928866	0.744148	0.0921425	0.749837	0.0925482	0.750428	0.0928877	0.752606	0.0928038	0.747267	0.092277
Symbol Type	1	0.7399	0.0905	0.701811	0.0874941	0.71865	0.0891846	0.735656	0.0908777	0.75283	0.0925734	0.770174	0.0942718	0.713403	0.0885178	0.713403	0.088358	0.713403	0.0886775			0.75127	0.0933342	0.742609	0.0918328	0.743371	0.0921374	0.753441	0.0928686	0.750378	0.0926492	0.747433	0.0925956	0.747378	0.0917971	0.750139	0.0927609	0.751979	0.0927719	0.742354	0.0920047	0.748005	0.0924641	0.748733	0.0927761	0.751071	0.0927122	0.745567	0.0921374
Inverse Plot	FALSE	0.7424	0.09142	0.7014	0.0874846	0.718227	0.0891748	0.735221	0.0908677	0.752382	0.0925633	0.769714	0.0942615	0.716096	0.0887871	0.716096	0.0886268	0.716096	0.0889474			0.749481	0.0931941	0.740251	0.0916081	0.74137	0.091959	0.751554	0.0927132	0.748506	0.0925199	0.74544	0.0924333	0.745373	0.0916523	0.748064	0.0925965	0.75	0.0926222	0.740356	0.0918321	0.745965	0.0923438	0.746847	0.0926311	0.749362	0.0925903	0.743675	0.0919655
Color Plot	TRUE	0.7446	0.09149	0.701039	0.0874662	0.717856	0.0891561	0.734839	0.0908486	0.75199	0.0925438	0.769311	0.0942416	0.718794	0.0890565	0.718794	0.0888957	0.718794	0.0892172			0.747559	0.093026	0.737718	0.0913499	0.739219	0.091751	0.749526	0.0925291	0.746495	0.0923609	0.743299	0.0922403	0.743218	0.091476	0.745834	0.0924001	0.747874	0.0924416	0.73821	0.0916295	0.743773	0.0921907	0.74482	0.0924566	0.747526	0.0924414	0.741641	0.0917658
3D plot	FALSE	0.7349	0.09073	0.700758	0.0874405	0.717567	0.0891299	0.734542	0.090822	0.751685	0.0925166	0.768997	0.0942139	0.721495	0.0893259	0.721495	0.0891646	0.721495	0.0894872			0.745557	0.0928347	0.735077	0.0910652	0.736978	0.0915189	0.747413	0.0923212	0.744399	0.0921765	0.741068	0.092022	0.740972	0.0912731	0.743511	0.0921769	0.745658	0.0922351	0.735973	0.0914024	0.741489	0.0920089	0.742709	0.0922574	0.745613	0.0922696	0.739521	0.0915439
Linear	FALSE	0.7404	0.09114	0.70058	0.0874097	0.717384	0.0890984	0.734354	0.0907898	0.751491	0.0924839	0.768798	0.0941805	0.724201	0.0895955	0.724201	0.0894337	0.724201	0.0897572			0.743528	0.0926251	0.732402	0.0907618	0.734707	0.0912691	0.745272	0.0920953	0.742276	0.0919718	0.738807	0.0917842	0.738698	0.0910492	0.741157	0.091933	0.743414	0.0920082	0.733708	0.0911569	0.739175	0.0918034	0.740569	0.0920389	0.743675	0.0920794	0.737374	0.0913058
Data Range	AC635:AG672	0.7417	0.09155	0.700519	0.087376	0.717321	0.0890642	0.734289	0.0907549	0.751425	0.0924482	0.76873	0.0941442	0.726912	0.0898651	0.726912	0.0897028	0.726912	0.0900273			0.741528	0.0924032	0.729765	0.090448	0.732469	0.0910084	0.743162	0.0918575	0.740184	0.0917522	0.73658	0.0915336	0.736456	0.0908102	0.738838	0.0916752	0.741202	0.0917672	0.731474	0.0908998	0.736895	0.0915799	0.738461	0.091807	0.741765	0.0918762	0.735257	0.091058
Filled Symbols	FALSE	0.7447	0.0916	0.70058	0.0873424	0.717384	0.0890299	0.734354	0.0907199	0.751491	0.0924126	0.768798	0.0941079	0.729626	0.0901347	0.729626	0.0899719	0.729626	0.0902975			0.739612	0.0921749	0.727238	0.0901324	0.730324	0.090744	0.74114	0.0916144	0.73818	0.0915239	0.734445	0.0912768	0.734308	0.0905628	0.736615	0.0914104	0.739083	0.0915187	0.729334	0.090638	0.73471	0.0913443	0.736441	0.0915682	0.739935	0.0916655	0.733229	0.0908072
ConcAge	TRUE	0.7385	0.09095	0.700758	0.0873116	0.717567	0.0889984	0.734542	0.0906878	0.751685	0.0923798	0.768997	0.0940745	0.732345	0.0904044	0.732345	0.0902411	0.732345	0.0905677			0.737833	0.0919465	0.72489	0.0898235	0.728332	0.090483	0.739261	0.0913725	0.736318	0.091293	0.732462	0.0910209	0.732312	0.0903136	0.73455	0.0911458	0.737114	0.0912693	0.727346	0.0903788	0.732681	0.0911031	0.734564	0.0913288	0.738235	0.0914529	0.731344	0.0905604
ConcSwap	FALSE	0.7377	0.09062	0.701039	0.0872859	0.717856	0.0889722	0.734839	0.0906611	0.75199	0.0923526	0.769311	0.0940468	0.735068	0.0906742	0.735068	0.0905104	0.735068	0.090838			0.736237	0.0917241	0.722785	0.0895298	0.726546	0.0902325	0.737578	0.0911384	0.734649	0.0910659	0.730685	0.0907729	0.730524	0.0900696	0.732699	0.0908888	0.735349	0.091026	0.725564	0.0901291	0.730862	0.090863	0.732882	0.0910955	0.736711	0.0912444	0.729655	0.0903241
1st Symbol-row	1	0.7364	0.09064	0.7014	0.0872675	0.718227	0.0889535	0.735221	0.090642	0.752382	0.0923332	0.769714	0.0940269	0.737795	0.0909441	0.737795	0.0907798	0.737795	0.0911084			0.73487	0.091514	0.72098	0.0892593	0.725015	0.0899994	0.736135	0.0909186	0.733219	0.0908486	0.729161	0.0905396	0.728991	0.0898373	0.731113	0.0906462	0.733837	0.0907954	0.724037	0.0898958	0.729303	0.0906304	0.731441	0.0908745	0.735405	0.0910456	0.728207	0.090105
		0.7403	0.09144	0.701811	0.087258	0.71865	0.0889437	0.735656	0.0906321	0.75283	0.092323	0.770174	0.0940166	0.740527	0.091214	0.740527	0.0910492	0.740527	0.0913788			0.733769	0.0913217	0.719525	0.0890193	0.723781	0.0897901	0.734972	0.090719	0.732067	0.0906473	0.727934	0.0903273	0.727756	0.089623	0.729835	0.0904247	0.732619	0.0905836	0.722806	0.0896853	0.728048	0.0904117	0.730279	0.090672	0.734353	0.0908619	0.72704	0.0899089
		0.7405	0.09171	0.70224	0.087258	0.719091	0.0889437	0.736109	0.0906321	0.753296	0.092323	0.770653	0.0940166	0.743263	0.091484	0.743263	0.0913187	0.743263	0.0916493			0.732963	0.0911525	0.71846	0.0888165	0.722878	0.0896103	0.734121	0.090545	0.731223	0.0904673	0.727035	0.0901417	0.726852	0.0894327	0.7289	0.0902304	0.731727	0.0903967	0.721905	0.0895033	0.727128	0.0902129	0.729429	0.0904935	0.733583	0.0906984	0.726185	0.0897412
		0.7381	0.0909	0.702651	0.0872675	0.719514	0.0889535	0.736545	0.090642	0.753743	0.0923332	0.771113	0.0940269	0.746003	0.0917541	0.746003	0.0915882	0.746003	0.0919199			0.732474	0.0910112	0.717813	0.0886563	0.722329	0.0894648	0.733605	0.0904015	0.730712	0.0903135	0.72649	0.0899881	0.726304	0.0892715	0.728332	0.0900686	0.731186	0.0902395	0.721358	0.0893547	0.726571	0.0900394	0.728914	0.0903437	0.733116	0.0905594	0.725666	0.0896064
		0.7309	0.08993	0.703012	0.0872859	0.719886	0.0889722	0.736926	0.0906611	0.754136	0.0923526	0.771516	0.0940468	0.748747	0.0920242	0.748747	0.0918578	0.748747	0.0921905			0.732316	0.0909014	0.717602	0.0885431	0.722151	0.0893576	0.733437	0.0902923	0.730547	0.0901902	0.726314	0.0898705	0.726127	0.0891438	0.728149	0.0899436	0.731011	0.0901164	0.721181	0.0892436	0.726392	0.0898959	0.728747	0.0902269	0.732966	0.0904488	0.725498	0.0895083
		0.753	0.09232	0.703293	0.0873116	0.720174	0.0889984	0.737223	0.0906878	0.754441	0.0923798	0.771829	0.0940745	0.751496	0.0922944	0.751496	0.0921275	0.751496	0.0924613			0.732493	0.0908262	0.717833	0.0884801	0.722348	0.0892917	0.733624	0.0902204	0.730733	0.0901007	0.726511	0.0897922	0.726326	0.0890531	0.728354	0.0898588	0.731207	0.0900308	0.721378	0.0891731	0.726594	0.0897863	0.728934	0.0901462	0.733135	0.0903696	0.725684	0.0894496
		0.7427	0.0917	0.703471	0.0873424	0.720358	0.0890299	0.737412	0.0907199	0.754635	0.0924126	0.772028	0.0941079	0.754249	0.0925646	0.754249	0.0923973	0.754249	0.092732			0.733	0.0907877	0.718499	0.0884688	0.722915	0.0892688	0.734158	0.0901878	0.731264	0.0900475	0.727076	0.0897553	0.726895	0.0890019	0.728943	0.0898167	0.731768	0.0899851	0.721944	0.0891451	0.727173	0.0897137	0.729469	0.0901037	0.73362	0.090324	0.726219	0.0894317
		0.7328	0.09027	0.703532	0.087376	0.72042	0.0890642	0.737476	0.0907549	0.754701	0.0924482	0.772097	0.0941442	0.757007	0.092835	0.757007	0.0926671	0.757007	0.0930029			0.733824	0.0907869	0.719583	0.0885097	0.723836	0.0892896	0.735027	0.0901953	0.732126	0.090032	0.727993	0.0897607	0.727818	0.0889915	0.729898	0.0898183	0.73268	0.0899803	0.722863	0.0891603	0.728113	0.0896799	0.730338	0.0901007	0.734407	0.0903132	0.72709	0.0894553
		0.7301	0.09048	ConcTikEll	ConcTikEll	ConcTikEll	ConcTikEll	ConcTikEll	ConcTikEll	ConcTikEll	ConcTikEll	ConcTikEll	ConcTikEll	0.759769	0.0931054	0.759769	0.092937	0.759769	0.0932738			0.734942	0.0908238	0.721055	0.0886016	0.725086	0.0893535	0.736206	0.0902428	0.733296	0.0900546	0.729238	0.0898085	0.729071	0.0890223	0.731194	0.0898635	0.733916	0.0900168	0.72411	0.0892183	0.729387	0.089686	0.731516	0.0901372	0.735475	0.0903375	0.728272	0.0895196
		0.7309	0.09027											0.762535	0.0933758	0.762535	0.0932069	0.762535	0.0935447			0.736323	0.0908975	0.722874	0.0887421	0.726631	0.0894588	0.737663	0.0903289	0.734741	0.0901148	0.730777	0.0898972	0.73062	0.0890934	0.732797	0.0899513	0.735444	0.0900934	0.725652	0.0893175	0.730963	0.0897318	0.732972	0.0902123	0.736794	0.0903962	0.729733	0.089623
		0.746	0.09194											0.765305	0.0936464	0.765305	0.0934769	0.765305	0.0938158			0.73793	0.0910058	0.724991	0.0889272	0.728429	0.0896026	0.739359	0.0904514	0.736422	0.0902108	0.732567	0.0900244	0.732422	0.0892029	0.734661	0.0900791	0.737221	0.0902081	0.727446	0.0894553	0.732795	0.0898159	0.734667	0.0903239	0.738329	0.0904878	0.731433	0.0897626
		0.7392	0.0913											0.76808	0.093917	0.76808	0.093747	0.76808	0.0940869			0.739719	0.0911459	0.727349	0.0891519	0.73043	0.089781	0.741246	0.0906068	0.738294	0.0903401	0.73456	0.0901867	0.734427	0.0893477	0.736736	0.0902435	0.7392	0.0903578	0.729444	0.0896279	0.734835	0.0899362	0.736553	0.0904689	0.740038	0.0906097	0.733325	0.0899345
		0.7341	0.09045											0.770859	0.0941876	0.770859	0.0940172	0.770859	0.094358			0.741641	0.091314	0.729882	0.0894101	0.732581	0.089989	0.743274	0.0907909	0.740305	0.0904991	0.736701	0.0903797	0.736582	0.089524	0.738966	0.0904399	0.741326	0.0905384	0.73159	0.0898305	0.737027	0.0900893	0.73858	0.0906434	0.741874	0.0907586	0.735359	0.0901342
		0.7284	0.08967											0.773643	0.0944583	0.773643	0.0942874	0.773643	0.0946293			0.743643	0.0915053	0.732523	0.0896948	0.734822	0.0902211	0.745387	0.0909988	0.742401	0.0906835	0.738932	0.090598	0.738828	0.0897269	0.741289	0.0906631	0.743542	0.0907449	0.733827	0.0900576	0.739311	0.0902711	0.740691	0.0908426	0.743787	0.0909304	0.737479	0.0903561
		0.7317	0.09067											0.776431	0.0947291	0.776431	0.0945577	0.776431	0.0949006			0.745672	0.0917149	0.735198	0.0899982	0.737093	0.0904709	0.747528	0.0912247	0.744524	0.0908882	0.741193	0.0908358	0.741102	0.0899508	0.743643	0.090907	0.745786	0.0909718	0.736092	0.0903031	0.741625	0.0904766	0.742831	0.0910611	0.745725	0.0911206	0.739626	0.0905942
		0.7309	0.09007											0.779223	0.095	0.779223	0.094828	0.777454	0.095			0.747672	0.0919368	0.737835	0.090312	0.739331	0.0907316	0.749638	0.0914625	0.746616	0.0911078	0.74342	0.0910864	0.743344	0.0901898	0.745962	0.0911648	0.747998	0.0912128	0.738326	0.0905602	0.743905	0.0907001	0.744939	0.091293	0.747635	0.0913238	0.741743	0.090842
		0.7366	0.0909											0.779223	0.095	0.78	0.0949031	ConcBand	ConcBand			0.749588	0.0921651	0.740362	0.0906276	0.741476	0.090996	0.75166	0.0917056	0.74862	0.0913361	0.745555	0.0913432	0.745492	0.0904372	0.748185	0.0914296	0.750117	0.0914613	0.740466	0.090822	0.74609	0.0909357	0.746959	0.0915318	0.749465	0.0915345	0.743771	0.0910928
		0.7393	0.09114											IsoLine	IsoLine	ConcBand	ConcBand					0.751367	0.0923935	0.74271	0.0909365	0.743468	0.091257	0.753539	0.0919475	0.750482	0.091567	0.747538	0.0915991	0.747488	0.0906864	0.75025	0.0916942	0.752086	0.0917107	0.742454	0.0910812	0.748119	0.0911769	0.748836	0.0917712	0.751165	0.0917471	0.745656	0.0913396
		0.7289	0.09038																			0.752963	0.0926159	0.744815	0.0912302	0.745254	0.0915075	0.755222	0.0921816	0.752151	0.0917941	0.749315	0.0918471	0.749276	0.0909304	0.752101	0.0919512	0.753851	0.091954	0.744236	0.0913309	0.749938	0.091417	0.750518	0.0920045	0.752689	0.0919556	0.747345	0.0915759
		0.7296	0.08985																			0.75433	0.092826	0.74662	0.0915007	0.746785	0.0917406	0.756665	0.0924014	0.753581	0.0920114	0.750839	0.0920804	0.750809	0.0911627	0.753687	0.0921938	0.755363	0.0921846	0.745763	0.0915642	0.751497	0.0916496	0.751959	0.0922255	0.753995	0.0921544	0.748793	0.091795
		0.7331	0.09038																			0.755431	0.0930183	0.748075	0.0917407	0.748019	0.0919499	0.757828	0.092601	0.754733	0.0922127	0.752066	0.0922927	0.752044	0.091377	0.754965	0.0924153	0.756581	0.0923964	0.746994	0.0917747	0.752752	0.0918683	0.753121	0.092428	0.755047	0.0923381	0.74996	0.0919911
		0.7329	0.09025																			0.756237	0.0931875	0.74914	0.0919435	0.748922	0.0921297	0.758679	0.092775	0.755577	0.0923927	0.752965	0.0924783	0.752948	0.0915673	0.7559	0.0926096	0.757473	0.0925833	0.747895	0.0919567	0.753672	0.0920671	0.753971	0.0926065	0.755817	0.0925016	0.750815	0.0921588
		0.7356	0.09073																			0.756726	0.0933288	0.749787	0.0921037	0.749471	0.0922752	0.759195	0.0929185	0.756088	0.0925465	0.75351	0.0926319	0.753496	0.0917285	0.756468	0.0927714	0.758014	0.0927405	0.748442	0.0921053	0.754229	0.0922406	0.754486	0.0927563	0.756284	0.0926406	0.751334	0.0922936
		IsoLine	IsoLine																			0.756884	0.0934386	0.749998	0.0922169	0.749649	0.0923824	0.759363	0.0930277	0.756253	0.0926698	0.753686	0.0927495	0.753673	0.0918562	0.756651	0.0928964	0.758189	0.0928636	0.748619	0.0922164	0.754408	0.0923841	0.754653	0.0928731	0.756434	0.0927512	0.751502	0.0923917
																						Black	Black	Black	Black	Black	Black	Black	Black	Black	Black	Black	Black	Black	Black	Black	Black	Black	Black	Black	Black	Black	Black	Black	Black	Black	Black	Black	Black
[truncated: 50 more columns]

## Sheet: PlotDat1
Source sheet	Table S2	0.74	0.09169	0.711955	0.0882198	0.72042	0.0890642	0.728927	0.0899092	0.737476	0.0907549	0.746067	0.0916012	0.754701	0.0924482	0.763377	0.0932959	0.71	0.0881769	0.71	0.0880178	0.71	0.0883361	0.702025	0.087376	0.75583	0.0933946	0.763148	0.0930439	0.758917	0.0930348	0.76155	0.0932291	0.760194	0.0932883	0.759867	0.093004	0.754004	0.0927966	0.753594	0.0925024	0.748011	0.0918176	0.760286	0.0926518	0.748153	0.0919094
Plot name	Concordia0	0.7468	0.09148	0.711894	0.0882537	0.720358	0.0890984	0.728864	0.0899438	0.737412	0.0907898	0.746002	0.0916365	0.754635	0.0924839	0.76331	0.0933319	0.71	0.0881769	0.71	0.0880178	0.71	0.0883361	0.710427	0.0882198	0.755603	0.0934795	0.762978	0.0931433	0.758664	0.0930952	0.76134	0.0933177	0.759976	0.0933962	0.759665	0.0930694	0.753763	0.0928994	0.753374	0.0926017	0.747783	0.091895	0.760112	0.0927504	0.748014	0.0919496
Plot Type	1	0.7411	0.09099	0.711713	0.0882849	0.720174	0.0891299	0.728678	0.0899756	0.737223	0.090822	0.745811	0.091669	0.754441	0.0925166	0.763114	0.0933649	0.712035	0.0883808	0.712035	0.0882213	0.712035	0.0885403	0.718871	0.0890642	0.75495	0.0935157	0.762493	0.0932103	0.757932	0.0930982	0.76074	0.0933633	0.759352	0.093462	0.759086	0.0930909	0.753073	0.0929525	0.752742	0.0926564	0.747127	0.0919229	0.759618	0.0928154	0.747616	0.09196
1st free col	49	0.747	0.09174	0.711428	0.0883108	0.719886	0.0891561	0.728385	0.0900021	0.736926	0.0908486	0.74551	0.0916959	0.754136	0.0925438	0.762804	0.0933924	0.714072	0.0885847	0.714072	0.0884248	0.714072	0.0887446	0.727356	0.0899092	0.753889	0.093502	0.761703	0.0932436	0.75674	0.0930437	0.759764	0.0933646	0.758339	0.0934837	0.758144	0.0930679	0.751953	0.0929546	0.751716	0.0926652	0.746061	0.0919005	0.758811	0.0928457	0.746974	0.0919402
Sigma Level	2	0.7451	0.09185	0.711062	0.0883294	0.719514	0.0891748	0.728009	0.090021	0.736545	0.0908677	0.745123	0.0917152	0.753743	0.0925633	0.762407	0.093412	0.716111	0.0887886	0.716111	0.0886283	0.716111	0.0889489	0.735883	0.0907549	0.752449	0.0934389	0.760622	0.0932426	0.755122	0.0929331	0.75844	0.0933216	0.756966	0.0934609	0.756865	0.093001	0.750433	0.0929056	0.750324	0.0926277	0.744614	0.0918285	0.757708	0.0928406	0.746119	0.091891
Absolute Errs	FALSE	0.7458	0.09146	0.710645	0.088339	0.719091	0.0891846	0.727579	0.0900308	0.736109	0.0908777	0.744682	0.0917252	0.753296	0.0925734	0.761953	0.0934223	0.718153	0.0889925	0.718153	0.0888319	0.718153	0.0891532	0.744452	0.0916012	0.75067	0.0933281	0.759273	0.0932073	0.753122	0.0927696	0.756805	0.0932354	0.755268	0.0933942	0.755285	0.0928921	0.748555	0.0928067	0.748605	0.092545	0.742827	0.0917088	0.756331	0.0928003	0.745086	0.0918146
Symbol Type	1	0.7373	0.09108	0.71021	0.088339	0.71865	0.0891846	0.727132	0.0900308	0.735656	0.0908777	0.744222	0.0917252	0.75283	0.0925734	0.76148	0.0934223	0.720198	0.0891965	0.720198	0.0890355	0.720198	0.0893576	0.753063	0.0924482	0.748599	0.0931726	0.75768	0.0931384	0.750793	0.0925575	0.754901	0.0931085	0.753294	0.0932853	0.753445	0.0927441	0.74637	0.0926608	0.746604	0.0924193	0.740746	0.0915447	0.754706	0.0927255	0.743921	0.0917143
Inverse Plot	FALSE	0.7383	0.09097	0.709793	0.0883294	0.718227	0.0891748	0.726703	0.090021	0.735221	0.0908677	0.74378	0.0917152	0.752382	0.0925633	0.761027	0.093412	0.722245	0.0894006	0.722245	0.0892392	0.722245	0.089562	0.761717	0.0932959	0.746294	0.0929767	0.755876	0.0930372	0.748201	0.0923026	0.752783	0.0929442	0.751095	0.0931373	0.751398	0.0925611	0.743938	0.0924717	0.744377	0.0922541	0.73843	0.0913406	0.752864	0.0926178	0.742675	0.0915945
Color Plot	TRUE	0.7321	0.09008	0.709427	0.0883108	0.717856	0.0891561	0.726327	0.0900021	0.734839	0.0908486	0.743394	0.0916959	0.75199	0.0925438	0.760629	0.0933924	0.724294	0.0896047	0.724294	0.0894429	0.724294	0.0897665	IsoLine	IsoLine	0.743817	0.0927457	0.753896	0.0929057	0.745414	0.0920119	0.750506	0.0927471	0.748734	0.0929542	0.749197	0.0923481	0.741324	0.0922447	0.741984	0.0920539	0.735941	0.0911021	0.750843	0.0924791	0.741403	0.0914604
3D plot	FALSE	0.7436	0.09103	0.709142	0.0882849	0.717567	0.0891299	0.726034	0.0899756	0.734542	0.090822	0.743092	0.091669	0.751685	0.0925166	0.76032	0.0933649	0.726346	0.0898088	0.726346	0.0896466	0.726346	0.089971			0.741237	0.0924859	0.751777	0.0927464	0.74251	0.0916934	0.748134	0.0925225	0.746273	0.092741	0.746904	0.0921109	0.738601	0.0919859	0.73949	0.0918241	0.733347	0.0908357	0.74868	0.0923122	0.740159	0.091318
Linear	FALSE	IsoLine	IsoLine	0.708961	0.0882537	0.717384	0.0890984	0.725848	0.0899438	0.734354	0.0907898	0.742901	0.0916365	0.751491	0.0924839	0.760123	0.0933319	0.7284	0.0900129	0.7284	0.0898503	0.7284	0.0901755			0.738622	0.0922043	0.749561	0.0925625	0.739567	0.0913557	0.745731	0.0922765	0.74378	0.0925034	0.744581	0.0918559	0.735842	0.0917024	0.736964	0.091571	0.730719	0.0905488	0.746419	0.0921204	0.738999	0.0911733
Data Range	AC565:AG574			0.708899	0.0882198	0.717321	0.0890642	0.725784	0.0899092	0.734289	0.0907549	0.742836	0.0916012	0.751425	0.0924482	0.760056	0.0932959	0.730456	0.0902171	0.730456	0.0900541	0.730456	0.0903801			0.736045	0.0919088	0.747292	0.0923575	0.736667	0.091008	0.743363	0.092016	0.741323	0.092248	0.742291	0.0915901	0.733123	0.0914019	0.734475	0.0913015	0.728129	0.090249	0.744103	0.0919074	0.737973	0.0910328
Filled Symbols	FALSE			0.708961	0.0881858	0.717384	0.0890299	0.725848	0.0898746	0.734354	0.0907199	0.742901	0.0915659	0.751491	0.0924126	0.760123	0.0932599	0.732515	0.0904213	0.732515	0.090258	0.732515	0.0905847			0.733576	0.0916072	0.745013	0.0921355	0.733887	0.0906598	0.741093	0.0917478	0.738969	0.0919818	0.740097	0.0913207	0.730518	0.0910926	0.732089	0.091023	0.725647	0.0899446	0.741776	0.0916772	0.737126	0.0909026
ConcAge	TRUE			0.709142	0.0881546	0.717567	0.0889984	0.726034	0.0898427	0.734542	0.0906878	0.743092	0.0915335	0.751685	0.0923798	0.76032	0.0932268	0.734577	0.0906256	0.734577	0.0904619	0.734577	0.0907893			0.731282	0.091308	0.742769	0.0919006	0.731304	0.0903206	0.738985	0.0914795	0.736783	0.091712	0.738058	0.0910551	0.728098	0.090783	0.729874	0.090743	0.723342	0.089644	0.739486	0.0914345	0.736495	0.0907884
ConcSwap	FALSE			0.709427	0.0881287	0.717856	0.0889722	0.726327	0.0898163	0.734839	0.0906611	0.743394	0.0915065	0.75199	0.0923526	0.760629	0.0931994	0.736641	0.0908299	0.736641	0.0906658	0.736641	0.090994			0.729226	0.0910191	0.740603	0.0916576	0.728988	0.0899997	0.737096	0.0912183	0.734823	0.0914459	0.736231	0.0908006	0.725929	0.0904815	0.727888	0.0904693	0.721275	0.0893552	0.737275	0.0911839	0.736107	0.0906952
1st Symbol-row	1			0.709793	0.0881102	0.718227	0.0889535	0.726703	0.0897974	0.735221	0.090642	0.74378	0.0914872	0.752382	0.0923332	0.761027	0.0931797	0.738707	0.0910342	0.738707	0.0908697	0.738707	0.0911987			0.727464	0.0907486	0.738558	0.0914112	0.727002	0.0897058	0.735476	0.0909713	0.733144	0.0911909	0.734664	0.0905641	0.72407	0.0901963	0.726186	0.0902091	0.719503	0.0890862	0.735188	0.0909303	0.73598	0.0906269
				0.71021	0.0881005	0.71865	0.0889437	0.727132	0.0897876	0.735656	0.0906321	0.744222	0.0914772	0.75283	0.092323	0.76148	0.0931695	0.740776	0.0912386	0.740776	0.0910737	0.740776	0.0914035			0.726044	0.0905037	0.736673	0.091166	0.725401	0.0894469	0.734171	0.0907453	0.73179	0.0909538	0.733401	0.090352	0.722572	0.0899353	0.724814	0.0899698	0.718075	0.0888443	0.733264	0.0906786	0.736119	0.0905868
				0.710645	0.0881005	0.719091	0.0889437	0.727579	0.0897876	0.736109	0.0906321	0.744682	0.0914772	0.753296	0.092323	0.761953	0.0931695	0.742847	0.091443	0.742847	0.0912778	0.742847	0.0916083			0.725004	0.0902912	0.734986	0.090927	0.724228	0.0892301	0.733216	0.0905464	0.7308	0.0907412	0.732477	0.0901702	0.721476	0.0897054	0.723811	0.0897577	0.71703	0.0886361	0.731542	0.0904338	0.736517	0.0905764
				0.711062	0.0881102	0.719514	0.0889535	0.728009	0.0897974	0.736545	0.090642	0.745123	0.0914872	0.753743	0.0923332	0.762407	0.0931797	0.744921	0.0916475	0.744921	0.0914818	0.744921	0.0918131			0.724374	0.0901169	0.733528	0.0906988	0.723516	0.0890613	0.732637	0.0903801	0.7302	0.0905588	0.731916	0.0900235	0.720811	0.089513	0.723202	0.0895787	0.716395	0.0884673	0.730054	0.0902006	0.737158	0.0905962
				0.711428	0.0881287	0.719886	0.0889722	0.728385	0.0898163	0.736926	0.0906611	0.74551	0.0915065	0.754136	0.0923526	0.762804	0.0931994	0.746997	0.091852	0.746997	0.091686	0.746997	0.092018			0.72417	0.0899854	0.732329	0.0904857	0.723283	0.0889452	0.73245	0.0902509	0.730006	0.0904117	0.731733	0.089916	0.720596	0.0893634	0.723006	0.0894376	0.716189	0.0883424	0.72883	0.0899835	0.738014	0.0906454
				0.711713	0.0881546	0.720174	0.0889984	0.728678	0.0898427	0.737223	0.0906878	0.745811	0.0915335	0.754441	0.0923798	0.763114	0.0932268	0.749076	0.0920565	0.749076	0.0918901	0.749076	0.0922229			0.724397	0.0899005	0.731411	0.090292	0.723536	0.0888848	0.73266	0.0901623	0.730224	0.0903038	0.731935	0.0898506	0.720837	0.0892606	0.723226	0.0893383	0.716417	0.088265	0.727893	0.0897868	0.739047	0.0907218
				0.711894	0.0881858	0.720358	0.0890299	0.728864	0.0898746	0.737412	0.0907199	0.746002	0.0915659	0.754635	0.0924126	0.76331	0.0932599	0.751157	0.0922611	0.751157	0.0920943	0.751157	0.0924279			0.72505	0.0898643	0.730793	0.0901215	0.724268	0.0888818	0.73326	0.0901167	0.730848	0.090238	0.732514	0.0898291	0.721527	0.0892075	0.723858	0.0892836	0.717073	0.0882371	0.727262	0.0896143	0.740212	0.0908221
				0.711955	0.0882198	0.72042	0.0890642	0.728927	0.0899092	0.737476	0.0907549	0.746067	0.0916012	0.754701	0.0924482	0.763377	0.0932959	0.753241	0.0924657	0.753241	0.0922985	0.753241	0.0926329			0.726111	0.089878	0.730486	0.0899773	0.72546	0.0889363	0.734236	0.0901154	0.731861	0.0902163	0.733456	0.0898521	0.722647	0.0892054	0.724884	0.0892748	0.718139	0.0882595	0.726949	0.0894694	0.741457	0.0909419
				ConcTikEll	ConcTikEll	ConcTikEll	ConcTikEll	ConcTikEll	ConcTikEll	ConcTikEll	ConcTikEll	ConcTikEll	ConcTikEll	ConcTikEll	ConcTikEll	ConcTikEll	ConcTikEll	0.755327	0.0926704	0.755327	0.0925028	0.755327	0.0928379			0.727551	0.0899411	0.730497	0.0898625	0.727078	0.0890469	0.73556	0.0901584	0.733234	0.0902391	0.734735	0.089919	0.724167	0.0892544	0.726276	0.0893123	0.719586	0.0883315	0.72696	0.0893548	0.74273	0.091076
																		0.757416	0.092875	0.757416	0.0927071	0.757416	0.093043			0.72933	0.0900519	0.730826	0.0897791	0.729078	0.0892104	0.737195	0.0902446	0.734932	0.0903058	0.736315	0.0900279	0.726045	0.0893533	0.727995	0.089395	0.721373	0.0884512	0.727295	0.0892728	0.743973	0.0912184
																		0.759507	0.0930798	0.759507	0.0929114	0.759507	0.0932481			0.731401	0.0902074	0.731465	0.0897288	0.731407	0.0894225	0.739099	0.0903715	0.736906	0.0904147	0.738155	0.0901759	0.72823	0.0894992	0.729996	0.0895207	0.723454	0.0886153	0.727948	0.0892251	0.745133	0.0913631
																		0.761601	0.0932845	0.761601	0.0931158	0.761601	0.0934533			0.733706	0.0904033	0.732403	0.0897126	0.733999	0.0896774	0.741217	0.0905358	0.739105	0.0905627	0.740202	0.0903589	0.730662	0.0896883	0.732223	0.0896859	0.72577	0.0888194	0.728905	0.0892124	0.746159	0.0915035
																		0.763697	0.0934893	0.763697	0.0933202	0.763697	0.0936584			0.736183	0.0906343	0.733621	0.0897308	0.736786	0.0899681	0.743494	0.0907329	0.741466	0.0907458	0.742403	0.0905719	0.733276	0.0899153	0.734616	0.0898861	0.728259	0.0890579	0.730148	0.0892352	0.747007	0.0916337
																		0.765795	0.0936942	0.765795	0.0935247	0.765795	0.0938637			0.738763	0.0908941	0.735095	0.089783	0.73969	0.0902866	0.745866	0.0909575	0.743927	0.090959	0.744696	0.0908091	0.735999	0.0901741	0.73711	0.0901159	0.730853	0.0893243	0.731653	0.0892928	0.747638	0.091748
																		0.767896	0.093899	0.767896	0.0937292	0.767896	0.0940689			0.741378	0.0911757	0.736797	0.0898683	0.742633	0.0906243	0.748269	0.0912035	0.74642	0.0911966	0.747019	0.0910641	0.738758	0.0904576	0.739636	0.090369	0.733481	0.0896112	0.73339	0.0893843	0.748026	0.0918412
																		0.77	0.094104	0.77	0.0939337	0.77	0.0942742			0.743955	0.0914712	0.738694	0.0899849	0.745533	0.090972	0.750637	0.091464	0.748877	0.091452	0.749309	0.0913299	0.741477	0.0907581	0.742125	0.0906385	0.736071	0.089911	0.735326	0.0895078	0.748153	0.0919094
																		0.77	0.094104	0.77	0.0939337	0.77	0.0942742			0.746424	0.0917728	0.740749	0.0901307	0.748313	0.0913202	0.752907	0.0917322	0.751231	0.0917182	0.751503	0.0915993	0.744082	0.0910674	0.744511	0.090917	0.738553	0.0902154	0.737423	0.089661	Cyan	Cyan
																		IsoLine	IsoLine	ConcBand	ConcBand	ConcBand	ConcBand			0.748718	0.092072	0.742922	0.0903027	0.750896	0.0916594	0.755015	0.0920005	0.753417	0.091988	0.753542	0.0918649	0.746502	0.091377	0.746726	0.091197	0.740858	0.090516	0.739641	0.0898408
																										0.750774	0.0923609	0.74517	0.0904976	0.753212	0.0919803	0.756904	0.0922617	0.755377	0.0922541	0.755369	0.0921194	0.748671	0.0916785	0.748712	0.0914707	0.742925	0.0908048	0.741935	0.0900437
																										0.752536	0.0926314	0.747449	0.0907116	0.755198	0.0922742	0.758524	0.0925087	0.757056	0.0925091	0.756936	0.0923559	0.75053	0.0919637	0.750414	0.0917309	0.744697	0.0910738	0.744262	0.0902658
																										0.753956	0.0928763	0.749716	0.0909406	0.756799	0.0925331	0.759829	0.0927347	0.75841	0.0927462	0.758199	0.092568	0.752028	0.0922247	0.751786	0.0919702	0.746125	0.0913157	0.746576	0.0905029
																										0.754996	0.0930888	0.751927	0.0911801	0.757972	0.0927499	0.760784	0.0929336	0.7594	0.0929588	0.759123	0.0927498	0.753124	0.0924546	0.752789	0.0921823	0.74717	0.0915239	0.748832	0.0907501
																										0.755626	0.0932631	0.754037	0.0914255	0.758684	0.0929187	0.761363	0.0930999	0.76	0.0931412	0.759684	0.0928965	0.753789	0.092647	0.753398	0.0923613	0.747805	0.0916927	0.750986	0.0910028
																										0.75583	0.0933946	0.756007	0.0916719	0.758917	0.0930348	0.76155	0.0932291	0.760194	0.0932883	0.759867	0.093004	0.754004	0.0927966	0.753594	0.0925024	0.748011	0.0918176	0.752997	0.0912561
																										Black	Black	0.757797	0.0919145	Black	Black	Black	Black	Black	Black	Black	Black	Black	Black	Black	Black	Black	Black	0.754824	0.0915049
																												0.759374	0.0921487															0.756433	0.0917445
																												0.760706	0.0923699															0.757793	0.0919702
																												0.761767	0.0925738															0.758876	0.0921776
																												0.762536	0.0927563															0.759662	0.0923627
																												0.763	0.0929141															0.760135	0.0925218
																												0.763148	0.0930439															0.760286	0.0926518
																												Black	Black															Black	Black

## Sheet: PlotDat2
Source sheet	Table S2	0.7286	0.08984	0.703532	0.087376	0.72042	0.0890642	0.737476	0.0907549	0.754701	0.0924482	0.772097	0.0941442	0.69	0.0861623	0.69	0.086007	0.69	0.0863177	0.685345	0.0856906	0.752046	0.0925756	0.758286	0.09367	0.756617	0.0936414	0.763354	0.0941947	0.768584	0.0942269	0.762141	0.0937884	0.760718	0.0937273	0.761635	0.0938581	0.768821	0.0946196	0.768342	0.0942594	0.754261	0.0928332	0.760324	0.093615	0.771294	0.0950094	0.744438	0.0916591
Plot name	Concordia0	0.7353	0.09098	0.703471	0.0874097	0.720358	0.0890984	0.737412	0.0907898	0.754635	0.0924839	0.772028	0.0941805	0.69	0.0861623	0.69	0.086007	0.69	0.0863177	0.702025	0.087376	0.751714	0.0926448	0.75796	0.0937385	0.756296	0.0937065	0.76303	0.0942617	0.768244	0.0943213	0.761804	0.0938524	0.760199	0.0937881	0.761298	0.0939504	0.768485	0.0947041	0.767993	0.0943845	0.753913	0.0929187	0.759979	0.093709	0.770952	0.095097	0.744118	0.0917294
Plot Type	1	0.7339	0.09097	0.703293	0.0874405	0.720174	0.0891299	0.737223	0.090822	0.754441	0.0925166	0.771829	0.0942139	0.693026	0.0864684	0.693026	0.0863125	0.693026	0.0866244	0.718871	0.0890642	0.750751	0.0926376	0.757016	0.0937318	0.755363	0.093697	0.762092	0.0942539	0.767261	0.0943395	0.760825	0.0938384	0.758692	0.0937271	0.760326	0.0939669	0.767514	0.0947124	0.766989	0.0944345	0.752908	0.0929251	0.758982	0.0937252	0.769966	0.0951071	0.743193	0.0917264
1st free col	75	0.7405	0.09152	0.703012	0.0874662	0.719886	0.0891561	0.736926	0.0908486	0.754136	0.0925438	0.771516	0.0942416	0.696058	0.0867747	0.696058	0.0866182	0.696058	0.0869312	0.735883	0.0907549	0.749184	0.092554	0.75548	0.09365	0.753845	0.093613	0.760564	0.0941715	0.765663	0.0942811	0.759233	0.0937467	0.756263	0.0935469	0.758744	0.0939071	0.765934	0.0946442	0.765358	0.0944079	0.751272	0.0928522	0.757362	0.0936634	0.768361	0.0950396	0.741686	0.0916501
Sigma Level	2	0.7447	0.09153	0.702651	0.0874846	0.719514	0.0891748	0.736545	0.0908677	0.753743	0.0925633	0.771113	0.0942615	0.699095	0.087081	0.699095	0.0869239	0.699095	0.087238	0.753063	0.0924482	0.747056	0.0923964	0.753393	0.0934954	0.751783	0.093457	0.75849	0.0940168	0.763493	0.0941476	0.757069	0.0935798	0.753018	0.0932554	0.756597	0.0937727	0.763788	0.0945014	0.763145	0.0943056	0.74905	0.0927021	0.755161	0.093525	0.766181	0.0948962	0.73964	0.0915026
Absolute Errs	FALSE	0.7383	0.09099	0.70224	0.0874941	0.719091	0.0891846	0.736109	0.0908777	0.753296	0.0925734	0.770653	0.0942718	0.702138	0.0873874	0.702138	0.0872297	0.702138	0.087545	0.770413	0.0941442	0.744424	0.092169	0.750813	0.0932722	0.749233	0.0932331	0.755924	0.093794	0.76081	0.0939428	0.754393	0.0933422	0.7491	0.0928653	0.753942	0.0935673	0.761136	0.094288	0.760409	0.0941303	0.746303	0.0924788	0.75244	0.0933139	0.763487	0.094681	0.73711	0.091288
Symbol Type	1	0.7376	0.091	0.701811	0.0874941	0.71865	0.0891846	0.735656	0.0908777	0.75283	0.0925734	0.770174	0.0942718	0.705186	0.0876938	0.705186	0.0875356	0.705186	0.0878521	IsoLine	IsoLine	0.74136	0.0918781	0.747809	0.0929864	0.746265	0.0929475	0.752938	0.0935091	0.757688	0.0936721	0.751279	0.0930405	0.744679	0.0923937	0.750853	0.0932964	0.758049	0.0940096	0.757226	0.0938869	0.743107	0.0921885	0.749273	0.093036	0.760351	0.0943997	0.734165	0.091012
Inverse Plot	FALSE	0.738	0.09117	0.7014	0.0874846	0.718227	0.0891748	0.735221	0.0908677	0.752382	0.0925633	0.769714	0.0942615	0.70824	0.0880004	0.70824	0.0878416	0.70824	0.0881592			0.737949	0.0915317	0.744465	0.0926459	0.742959	0.092608	0.749613	0.09317	0.754212	0.093343	0.74781	0.0926828	0.739949	0.0918612	0.747413	0.0929676	0.754611	0.093674	0.753681	0.0935818	0.739547	0.091839	0.745748	0.0926986	0.756859	0.09406	0.730885	0.0906822
Color Plot	TRUE	0.7452	0.09191	0.701039	0.0874662	0.717856	0.0891561	0.734839	0.0908486	0.75199	0.0925438	0.769311	0.0942416	0.711299	0.0883071	0.711299	0.0881477	0.711299	0.0884664			0.734282	0.091139	0.74087	0.09226	0.739406	0.0922238	0.746039	0.0927859	0.750476	0.0929644	0.744082	0.092279	0.735116	0.091291	0.743716	0.0925897	0.750917	0.0932903	0.749873	0.0932235	0.735721	0.0914399	0.741959	0.0923111	0.753106	0.0936713	0.72736	0.0903077
3D plot	FALSE	0.744	0.09163	0.700758	0.0874405	0.717567	0.0891299	0.734542	0.090822	0.751685	0.0925166	0.768997	0.0942139	0.714363	0.0886138	0.714363	0.0884539	0.714363	0.0887737			0.730461	0.090711	0.737124	0.0918391	0.735704	0.0918054	0.742314	0.0923673	0.746583	0.0925467	0.740196	0.09184	0.730391	0.0907081	0.739863	0.0921731	0.747066	0.092869	0.745905	0.0928218	0.731734	0.091002	0.73801	0.0918841	0.749195	0.093244	0.723687	0.0898985
Linear	FALSE	0.7298	0.09002	0.70058	0.0874097	0.717384	0.0890984	0.734354	0.0907898	0.751491	0.0924839	0.768798	0.0941805	0.717433	0.0889206	0.717433	0.0887601	0.717433	0.0890811			0.726589	0.0902592	0.733327	0.0913949	0.731952	0.0913642	0.738539	0.0919255	0.742638	0.0921013	0.736259	0.0913778	0.725982	0.090138	0.735959	0.0917292	0.743165	0.0924215	0.741885	0.0923875	0.727694	0.0905374	0.734009	0.091429	0.745232	0.0927899	0.719964	0.0894659
Data Range	AC727:AG751	0.7361	0.09086	0.700519	0.087376	0.717321	0.0890642	0.734289	0.0907549	0.751425	0.0924482	0.76873	0.0941442	0.720508	0.0892275	0.720508	0.0890664	0.720508	0.0893886			0.722771	0.0897959	0.729585	0.0909393	0.728253	0.0909122	0.734818	0.0914727	0.73875	0.0916403	0.732377	0.0909051	0.72208	0.0896056	0.732111	0.0912699	0.739319	0.09196	0.737922	0.0919326	0.723711	0.0900587	0.730065	0.0909585	0.741325	0.0923214	0.716295	0.0890218
Filled Symbols	FALSE	0.7473	0.09226	0.70058	0.0873424	0.717384	0.0890299	0.734354	0.0907199	0.751491	0.0924126	0.768798	0.0941079	0.723589	0.0895345	0.723589	0.0893729	0.723589	0.0896962			0.719113	0.0893339	0.725998	0.0904848	0.724708	0.0904618	0.731252	0.0910212	0.735023	0.0911763	0.728656	0.0904346	0.718857	0.0891341	0.728424	0.090808	0.735634	0.0914972	0.734125	0.0914694	0.719895	0.0895789	0.726286	0.0904853	0.737582	0.0918511	0.712778	0.0885781
ConcAge	TRUE	0.7219	0.08904	0.700758	0.0873116	0.717567	0.0889984	0.734542	0.0906878	0.751685	0.0923798	0.768997	0.0940745	0.726676	0.0898416	0.726676	0.0896794	0.726676	0.0900039			0.715713	0.0888856	0.722665	0.0900438	0.721414	0.0900253	0.727939	0.0905833	0.731561	0.0907219	0.725199	0.0899793	0.716453	0.0887441	0.724998	0.0903559	0.73221	0.0910456	0.730598	0.0910106	0.716349	0.0891111	0.722774	0.0900223	0.734104	0.0913921	0.70951	0.088147
ConcSwap	FALSE	0.7377	0.09052	0.701039	0.0872859	0.717856	0.0889722	0.734839	0.0906611	0.75199	0.0923526	0.769311	0.0940468	0.729768	0.0901488	0.729768	0.089986	0.729768	0.0903116			0.712665	0.0884634	0.719677	0.0896284	0.718461	0.0896146	0.724967	0.0901709	0.728457	0.0902896	0.722099	0.0895516	0.714973	0.0884527	0.721927	0.0899261	0.72914	0.0906176	0.727436	0.0905687	0.713169	0.0886681	0.719626	0.0895821	0.730985	0.0909567	0.70658	0.0877403
1st Symbol-row	1	0.7224	0.08896	0.7014	0.0872675	0.718227	0.0889535	0.735221	0.090642	0.752382	0.0923332	0.769714	0.0940269	0.732865	0.090456	0.732865	0.0902926	0.732865	0.0906194			0.710052	0.0880788	0.717115	0.0892498	0.715928	0.0892408	0.72242	0.0897954	0.725797	0.0898911	0.719441	0.0891631	0.714482	0.0882727	0.719294	0.0895302	0.726508	0.0902248	0.724726	0.0901557	0.710444	0.088262	0.716928	0.0891769	0.728312	0.0905568	0.704068	0.087369
		0.7275	0.08987	0.701811	0.087258	0.71865	0.0889437	0.735656	0.0906321	0.75283	0.092323	0.770174	0.0940166	0.735969	0.0907634	0.735969	0.0905994	0.735969	0.0909274			0.707944	0.0877422	0.715049	0.0889184	0.713886	0.0889142	0.720366	0.0894668	0.723652	0.0895373	0.717298	0.0888245	0.715001	0.0882119	0.717171	0.089179	0.724386	0.0898781	0.722541	0.089783	0.708246	0.0879039	0.714752	0.0888175	0.726156	0.0902034	0.702043	0.0870433
		0.727	0.08929	0.70224	0.087258	0.719091	0.0889437	0.736109	0.0906321	0.753296	0.092323	0.770653	0.0940166	0.739077	0.0910708	0.739077	0.0909062	0.739077	0.0912354			0.7064	0.0874628	0.713535	0.0886433	0.71239	0.0886436	0.71886	0.0891943	0.722081	0.0892379	0.715727	0.0885449	0.716508	0.0882729	0.715616	0.0888821	0.722831	0.0895867	0.720942	0.0894606	0.706636	0.0876035	0.713159	0.0885138	0.724578	0.0899062	0.700559	0.0867721
		0.7269	0.08949	0.702651	0.0872675	0.719514	0.0889535	0.736545	0.090642	0.753743	0.0923332	0.771113	0.0940269	0.742191	0.0913783	0.742191	0.0912132	0.742191	0.0915435			0.705462	0.0872482	0.712615	0.0884319	0.71148	0.0884366	0.717946	0.0889852	0.721127	0.089001	0.714772	0.088332	0.718937	0.0884531	0.714672	0.0886476	0.721887	0.0893587	0.719972	0.0891974	0.705658	0.087369	0.712191	0.0882741	0.723619	0.0896731	0.699657	0.0865627
		0.7398	0.09127	0.703012	0.0872859	0.719886	0.0889722	0.736926	0.0906611	0.754136	0.0923526	0.771516	0.0940468	0.745311	0.0916859	0.745311	0.0915202	0.745311	0.0918516			0.705154	0.0871044	0.712314	0.08829	0.711183	0.0882986	0.717646	0.0888453	0.720816	0.0888331	0.714459	0.0881916	0.722182	0.0887446	0.714365	0.0884819	0.721579	0.0892004	0.719658	0.0890006	0.705339	0.0872068	0.711876	0.088105	0.723306	0.0895106	0.699362	0.0864209
		0.7361	0.09035	0.703293	0.0873116	0.720174	0.0889984	0.737223	0.0906878	0.754441	0.0923798	0.771829	0.0940745	0.748437	0.0919936	0.748437	0.0918273	0.748437	0.0921599			0.705486	0.0870352	0.71264	0.0882215	0.711504	0.0882335	0.71797	0.0887783	0.721156	0.0887387	0.714796	0.0881276	0.7261	0.0891347	0.714702	0.0883896	0.721915	0.0891159	0.720007	0.0888755	0.705687	0.0871213	0.712221	0.088011	0.723648	0.089423	0.699682	0.0863506
		0.7392	0.09095	0.703471	0.0873424	0.720358	0.0890299	0.737412	0.0907199	0.754635	0.0924126	0.772028	0.0941079	0.751568	0.0923014	0.751568	0.0921345	0.751568	0.0924683			0.706449	0.0870424	0.713584	0.0882282	0.712437	0.088243	0.718908	0.0887861	0.722139	0.0887205	0.715775	0.0881416	0.730521	0.0896063	0.715674	0.0883731	0.722886	0.0891076	0.721011	0.0888255	0.706692	0.0871149	0.713218	0.0879948	0.724634	0.0894129	0.700607	0.0863536
		0.746	0.09143	0.703532	0.087376	0.72042	0.0890642	0.737476	0.0907549	0.754701	0.0924482	0.772097	0.0941442	0.754704	0.0926093	0.754704	0.0924418	0.754704	0.0927767			0.708016	0.087126	0.71512	0.08831	0.713955	0.088327	0.720436	0.0888685	0.723737	0.0887789	0.717367	0.0882333	0.735251	0.0901388	0.717256	0.0884329	0.724466	0.0891758	0.722642	0.0888521	0.708328	0.0871878	0.714838	0.0880566	0.726239	0.0894804	0.702114	0.0864299
		0.7393	0.09166	ConcTikEll	ConcTikEll	ConcTikEll	ConcTikEll	ConcTikEll	ConcTikEll	ConcTikEll	ConcTikEll	ConcTikEll	ConcTikEll	0.757846	0.0929172	0.757846	0.0927492	0.757846	0.0930852			0.710144	0.0872836	0.717207	0.0884646	0.716017	0.088483	0.72251	0.0890232	0.725907	0.0889124	0.719531	0.0884002	0.740084	0.090709	0.719403	0.0885673	0.726612	0.0893186	0.724855	0.0889544	0.71055	0.0873379	0.717039	0.088195	0.728419	0.0896238	0.70416	0.0865774
		0.7472	0.09179											0.760994	0.0932252	0.760994	0.0930566	0.760994	0.0933939			0.712776	0.087511	0.719787	0.0886878	0.718567	0.0887069	0.725076	0.089246	0.72859	0.0891172	0.722207	0.0886378	0.744809	0.0912919	0.722058	0.0887727	0.729264	0.089532	0.727591	0.0891297	0.713297	0.0875612	0.71976	0.0884061	0.731113	0.089839	0.70669	0.086792
		IsoLine	IsoLine											0.764148	0.0935334	0.764148	0.0933642	0.764148	0.0937026			0.71584	0.0878019	0.722791	0.0889736	0.721535	0.0889925	0.728062	0.0895309	0.731712	0.0893879	0.725321	0.0889395	0.749218	0.091862	0.725147	0.0890436	0.732351	0.0898104	0.730774	0.0893731	0.716493	0.0878515	0.722927	0.088684	0.734249	0.0901203	0.709635	0.087068
														0.767307	0.0938416	0.767307	0.0936718	0.767307	0.0940114			0.719251	0.0881483	0.726135	0.0893141	0.724841	0.089332	0.731387	0.08987	0.735188	0.089717	0.72879	0.0892972	0.75312	0.0923944	0.728587	0.0893724	0.735789	0.090146	0.734319	0.0896782	0.720053	0.088201	0.726452	0.0890214	0.737741	0.09046	0.712915	0.0873978
														0.770472	0.0941499	0.770472	0.0939795	0.770472	0.0943202			0.722918	0.088541	0.72973	0.0897	0.728394	0.0897162	0.734961	0.0902541	0.738924	0.0900956	0.732518	0.089701	0.756343	0.0928659	0.732284	0.0897503	0.739483	0.0905297	0.738127	0.0900365	0.723879	0.0886001	0.730241	0.0894089	0.741494	0.0908487	0.71644	0.0877723
														0.773642	0.0944583	0.773642	0.0942873	0.773642	0.0946292			0.726739	0.088969	0.733476	0.0901209	0.732096	0.0901346	0.738686	0.0906727	0.742817	0.0905133	0.736404	0.09014	0.758747	0.0932559	0.736137	0.0901669	0.743334	0.090951	0.742095	0.0904382	0.727866	0.089038	0.73419	0.0898359	0.745405	0.091276	0.720113	0.0881815
														0.776818	0.0947667	0.776818	0.0945952	0.776818	0.0949383			0.730611	0.0894208	0.737273	0.0905651	0.735848	0.0905758	0.742461	0.0911145	0.746762	0.0909587	0.740341	0.0906022	0.760227	0.0935473	0.740041	0.0906108	0.747235	0.0913985	0.746115	0.0908725	0.731906	0.0895026	0.738191	0.090291	0.749368	0.0917301	0.723836	0.0886141
														0.78	0.0950753	0.78	0.0949032	0.78	0.0952474			0.734429	0.0898841	0.741015	0.0910207	0.739547	0.0910278	0.746182	0.0915673	0.75065	0.0914197	0.744223	0.0910749	0.760718	0.0937273	0.743889	0.0910701	0.751081	0.09186	0.750078	0.0913274	0.735889	0.0899813	0.742135	0.0907615	0.753275	0.0921986	0.727505	0.0890582
														0.78	0.0950753	0.78	0.0949032	0.78	0.0952474			0.738087	0.0903461	0.744602	0.0914752	0.743092	0.0914782	0.749748	0.0920188	0.754377	0.0918837	0.747944	0.0915454	Black	Black	0.747576	0.091532	0.754766	0.0923228	0.753875	0.0917906	0.739705	0.0904611	0.745914	0.0912347	0.757018	0.0926689	0.731022	0.0895019
														IsoLine	IsoLine	ConcBand	ConcBand	ConcBand	ConcBand			0.741487	0.0907944	0.747935	0.0919162	0.746386	0.0919147	0.753061	0.0924567	0.757839	0.0923381	0.751401	0.0920007			0.751002	0.0919841	0.75819	0.0927744	0.757402	0.0922494	0.743251	0.0909289	0.749426	0.0916977	0.760496	0.0931279	0.73429	0.089933
																						0.744535	0.0912166	0.750923	0.0923316	0.749339	0.0923254	0.756033	0.0928691	0.760943	0.0927704	0.754501	0.0924284			0.754073	0.0924139	0.76126	0.0932024	0.760564	0.0926913	0.746431	0.0913719	0.752574	0.0921379	0.763615	0.0935633	0.73722	0.0903397
																						0.747148	0.0916012	0.753485	0.0927102	0.751872	0.0926992	0.75858	0.0932446	0.763603	0.0931689	0.757159	0.0928169			0.756706	0.0928098	0.763892	0.0935952	0.763274	0.0931043	0.749156	0.091778	0.755272	0.0925431	0.766288	0.0939632	0.739732	0.090711
																						0.749256	0.0919378	0.755551	0.0930416	0.753914	0.0930258	0.760634	0.0935732	0.765748	0.0935227	0.759302	0.0931555			0.758829	0.093161	0.766014	0.0939419	0.765459	0.093477	0.751354	0.0921361	0.757448	0.0929025	0.768444	0.0943166	0.741757	0.0910367
																						0.7508	0.0922172	0.757065	0.0933167	0.75541	0.0932964	0.76214	0.0938457	0.767319	0.0938221	0.760873	0.0934351			0.760384	0.0934579	0.767569	0.0942333	0.767058	0.0937994	0.752964	0.0924365	0.759041	0.0932062	0.770022	0.0946138	0.743241	0.0913079
																						0.751738	0.0924318	0.757985	0.0935281	0.75632	0.0935034	0.763054	0.0940548	0.768273	0.094059	0.761828	0.093648			0.761328	0.0936924	0.768513	0.0944613	0.768028	0.0940626	0.753942	0.092671	0.760009	0.0934459	0.770981	0.0948469	0.744143	0.0915173
																						0.752046	0.0925756	0.758286	0.09367	0.756617	0.0936414	0.763354	0.0941947	0.768584	0.0942269	0.762141	0.0937884			0.761635	0.0938581	0.768821	0.0946196	0.768342	0.0942594	0.754261	0.0928332	0.760324	0.093615	0.771294	0.0950094	0.744438	0.0916591
																						Black	Black	Black	Black	Black	Black	Black	Black	Black	Black	Black	Black			Black	Black	Black	Black	Black	Black	Black	Black	Black	Black	Black	Black	Black	Black
[truncated: 24 more columns]

## Sheet: PlotDat3
Source sheet	Table S2	0.8156	0.09856	0.789665	0.0958428	0.798514	0.0966931	0.807407	0.097544	0.816344	0.0983957	0.825325	0.0992479	0.83435	0.100101	0.843421	0.100954	0.78	0.0950753	0.78	0.0949032	0.78	0.0952474	0.787935	0.0958428	0.830439	0.10005	0.832282	0.0998039	0.828171	0.0990933	0.828272	0.0993349	0.837064	0.100731	0.826271	0.0995374	0.830159	0.0998371	0.830152	0.099897	0.832276	0.100159	0.824856	0.0992349	0.823951	0.0987157	0.833227	0.099705
Plot name	Concordia0	0.8167	0.09814	0.789594	0.0958798	0.798443	0.0967304	0.807335	0.0975817	0.816271	0.0984337	0.825251	0.0992863	0.834276	0.10014	0.843345	0.100994	0.78	0.0950753	0.78	0.0949032	0.78	0.0952474	0.796761	0.0966931	0.830225	0.10014	0.832059	0.0998775	0.827971	0.0991516	0.828046	0.099437	0.836859	0.100803	0.826063	0.0996189	0.829938	0.0999268	0.829938	0.099979	0.832051	0.100249	0.824629	0.0993424	0.823729	0.0988012	0.833003	0.0997994
Plot Type	1	0.8141	0.09756	0.78939	0.0959138	0.798236	0.0967648	0.807125	0.0976164	0.816058	0.0984686	0.825035	0.0993216	0.834057	0.100175	0.843123	0.101029	0.782369	0.0953047	0.782369	0.0951322	0.782369	0.0954773	0.805631	0.097544	0.829613	0.100186	0.831418	0.0999038	0.827392	0.0991665	0.827399	0.099495	0.836272	0.100831	0.825466	0.0996577	0.829304	0.0999716	0.829321	0.100017	0.831404	0.100293	0.823979	0.0994062	0.823092	0.0988411	0.832358	0.0998488
1st free col	85	0.8126	0.09782	0.789068	0.0959421	0.797909	0.0967933	0.806794	0.0976451	0.815723	0.0984977	0.824695	0.0993509	0.833713	0.100205	0.842775	0.101059	0.784741	0.0955342	0.784741	0.0953613	0.784741	0.0957072	0.814544	0.0983957	0.828618	0.100189	0.830374	0.0998819	0.82645	0.0991375	0.826348	0.0995074	0.835316	0.100815	0.824496	0.0996525	0.828275	0.0999703	0.828319	0.100009	0.830353	0.10029	0.822922	0.0994246	0.822057	0.0988344	0.831311	0.0998519
Sigma Level	2	0.8228	0.09922	0.788654	0.0959623	0.797489	0.0968137	0.806369	0.0976657	0.815292	0.0985185	0.824259	0.0993718	0.83327	0.100226	0.842326	0.101081	0.787117	0.0957638	0.787117	0.0955904	0.787117	0.0959372	0.823501	0.0992479	0.827269	0.100146	0.828958	0.0998126	0.825172	0.0990655	0.824923	0.0994737	0.83402	0.100755	0.82318	0.0996037	0.826878	0.0999228	0.82696	0.0999556	0.828928	0.10024	0.821489	0.0993969	0.820652	0.0987811	0.829889	0.0998085
Absolute Errs	FALSE	0.8118	0.09805	0.788181	0.0959728	0.797011	0.0968243	0.805884	0.0976765	0.8148	0.0985293	0.823761	0.0993828	0.832766	0.100237	0.841815	0.101092	0.789495	0.0959934	0.789495	0.0958195	0.789495	0.0961672	0.832503	0.100101	0.825601	0.100061	0.827207	0.0996976	0.823591	0.0989524	0.823161	0.0993949	0.832417	0.100654	0.821554	0.0995124	0.825152	0.0998306	0.825279	0.0998587	0.827166	0.100143	0.819717	0.0993241	0.818915	0.0986828	0.828133	0.0997199
Symbol Type	1	0.8148	0.09828	0.787689	0.0959728	0.796512	0.0968243	0.805378	0.0976765	0.814288	0.0985293	0.823242	0.0993828	0.83224	0.100237	0.841283	0.101092	0.791877	0.096223	0.791877	0.0960487	0.791877	0.0963973	0.841549	0.100954	0.82366	0.0999342	0.82517	0.0995401	0.821752	0.0988014	0.821111	0.0992731	0.830552	0.100514	0.819661	0.0993813	0.823143	0.099696	0.823324	0.0997206	0.825116	0.100004	0.817656	0.0992081	0.816895	0.0985422	0.826089	0.0995885
Inverse Plot	FALSE	0.8152	0.09835	0.787217	0.0959623	0.796033	0.0968137	0.804893	0.0976657	0.813797	0.0985185	0.822744	0.0993718	0.831735	0.100226	0.840771	0.101081	0.794262	0.0964527	0.794262	0.096278	0.794262	0.0966274	IsoLine	IsoLine	0.821499	0.0997702	0.822902	0.0993444	0.819704	0.0986165	0.818829	0.0991117	0.828476	0.100338	0.817555	0.0992139	0.820907	0.0995229	0.821147	0.0995452	0.822833	0.0998254	0.815362	0.099052	0.814645	0.098363	0.823813	0.0994178
Color Plot	TRUE	0.8166	0.09856	0.786803	0.0959421	0.795614	0.0967933	0.804468	0.0976451	0.813366	0.0984977	0.822307	0.0993509	0.831293	0.100205	0.840323	0.101059	0.79665	0.0966824	0.79665	0.0965073	0.79665	0.0968576			0.819178	0.0995731	0.820465	0.0991159	0.817503	0.0984028	0.816377	0.0989151	0.826244	0.100132	0.815291	0.0990147	0.818504	0.0993158	0.818808	0.0993371	0.820381	0.0996121	0.812897	0.0988602	0.812228	0.0981503	0.821369	0.0992126
3D plot	FALSE	0.8091	0.09774	0.786481	0.0959138	0.795287	0.0967648	0.804137	0.0976164	0.81303	0.0984686	0.821967	0.0993216	0.830949	0.100175	0.839974	0.101029	0.799041	0.0969122	0.799041	0.0967366	0.799041	0.0970878			0.816759	0.0993485	0.817924	0.0988608	0.81521	0.0981661	0.813822	0.0986885	0.823919	0.0999009	0.812932	0.0987892	0.816	0.0990804	0.81637	0.0991022	0.817825	0.0993701	0.810328	0.0986378	0.809709	0.0979096	0.818821	0.0989784
Linear	FALSE	0.8085	0.09713	0.786276	0.0958798	0.79508	0.0967304	0.803927	0.0975817	0.812817	0.0984337	0.821752	0.0992863	0.83073	0.10014	0.839753	0.100994	0.801436	0.097142	0.801436	0.096966	0.801436	0.097318			0.814308	0.0991023	0.815351	0.098586	0.812886	0.0979128	0.811234	0.0984383	0.821563	0.0996513	0.810542	0.0985435	0.813464	0.0988233	0.813901	0.0988467	0.815236	0.099106	0.807725	0.0983909	0.807158	0.0976477	0.81624	0.0987215
Data Range	AC503:AG530	0.8176	0.09815	0.786206	0.0958428	0.795009	0.0966931	0.803855	0.097544	0.812745	0.0983957	0.821678	0.0992479	0.830656	0.100101	0.839677	0.100954	0.803834	0.0973719	0.803834	0.0971955	0.803834	0.0975484			0.811892	0.0988414	0.812814	0.098299	0.810595	0.09765	0.808683	0.0981713	0.819241	0.0993899	0.808186	0.0982844	0.810963	0.0985513	0.811467	0.0985776	0.812685	0.0988271	0.805161	0.0981262	0.804642	0.0973717	0.813696	0.0984491
Filled Symbols	FALSE	0.815	0.09859	0.786276	0.0958058	0.79508	0.0966557	0.803927	0.0975064	0.812817	0.0983576	0.821752	0.0992096	0.83073	0.100062	0.839753	0.100915	0.806234	0.0976018	0.806234	0.0974249	0.806234	0.0977787			0.809578	0.0985728	0.810383	0.0980077	0.8084	0.0973846	0.806239	0.0978946	0.817016	0.0991239	0.805929	0.0980189	0.808568	0.0982719	0.809134	0.0983024	0.81024	0.0985408	0.802703	0.097851	0.802232	0.0970891	0.811259	0.0981686
ConcAge	TRUE	0.815	0.09831	0.786481	0.0957718	0.795287	0.0966214	0.804137	0.0974717	0.81303	0.0983227	0.821967	0.0991743	0.830949	0.100027	0.839974	0.100879	0.808638	0.0978318	0.808638	0.0976545	0.808638	0.0980091			0.807428	0.0983038	0.808125	0.09772	0.80636	0.0971241	0.803968	0.0976159	0.814949	0.0988605	0.803832	0.0977542	0.806342	0.0979927	0.806968	0.0980284	0.807968	0.0982551	0.80042	0.0975728	0.799993	0.0968076	0.808994	0.0978875
ConcSwap	FALSE	0.8206	0.09926	0.786803	0.0957435	0.795614	0.0965929	0.804468	0.0974429	0.813366	0.0982936	0.822307	0.099145	0.831293	0.099997	0.840323	0.10085	0.811046	0.0980618	0.811046	0.0978841	0.811046	0.0982396			0.805501	0.0980418	0.806101	0.0974438	0.804531	0.0968755	0.801933	0.0973428	0.813096	0.0986069	0.801953	0.0974976	0.804348	0.0977214	0.805025	0.0977632	0.805932	0.0979777	0.798374	0.0972992	0.797986	0.0965349	0.806964	0.0976136
1st Symbol-row	1	0.8156	0.09876	0.787217	0.0957233	0.796033	0.0965725	0.804893	0.0974224	0.813797	0.0982729	0.822744	0.099124	0.831735	0.0999759	0.840771	0.100828	0.813456	0.0982919	0.813456	0.0981137	0.813456	0.0984701			0.803849	0.097794	0.804365	0.0971865	0.802964	0.0966455	0.800189	0.0970827	0.811508	0.09837	0.800342	0.0972561	0.802638	0.0974653	0.803361	0.0975141	0.804187	0.0977161	0.796621	0.0970375	0.796266	0.0962785	0.805225	0.0973543
		0.8031	0.0971	0.787689	0.0957128	0.796512	0.0965619	0.805378	0.0974116	0.814288	0.098262	0.823242	0.0991131	0.83224	0.0999648	0.841283	0.100817	0.81587	0.098522	0.81587	0.0983434	0.81587	0.0987006			0.802518	0.097567	0.802966	0.0969553	0.8017	0.0964405	0.798783	0.0968427	0.810227	0.0981564	0.799043	0.0970362	0.80126	0.0972315	0.802019	0.0972877	0.80278	0.0974776	0.795208	0.0967951	0.79488	0.0960452	0.803823	0.0971167
		0.8068	0.09707	0.788181	0.0957128	0.797011	0.0965619	0.805884	0.0974116	0.8148	0.098262	0.823761	0.0991131	0.832766	0.0999648	0.841815	0.100817	0.818287	0.0987522	0.818287	0.0985731	0.818287	0.0989312			0.801543	0.0973672	0.801942	0.0967564	0.800774	0.096266	0.797754	0.0966294	0.80929	0.0979717	0.798093	0.096844	0.800251	0.0970262	0.801037	0.0970903	0.801751	0.0972686	0.794173	0.0965784	0.793865	0.0958416	0.802797	0.0969073
		0.8201	0.0994	0.788654	0.0957233	0.797489	0.0965725	0.806369	0.0974224	0.815292	0.0982729	0.824259	0.099124	0.83327	0.0999759	0.842326	0.100828	0.820707	0.0989824	0.820707	0.0988029	0.820707	0.0991619			0.800953	0.0971998	0.80132	0.0965952	0.800212	0.0961268	0.79713	0.0964485	0.808721	0.0978211	0.797516	0.0966846	0.79964	0.0968551	0.800441	0.0969272	0.801127	0.0970949	0.793546	0.0963933	0.793249	0.0956731	0.802174	0.0967318
		0.8174	0.09863	0.789068	0.0957435	0.797909	0.0965929	0.806794	0.0974429	0.815723	0.0982936	0.824695	0.099145	0.833713	0.099997	0.842775	0.10085	0.82313	0.0992127	0.82313	0.0990327	0.82313	0.0993926			0.800761	0.0970696	0.801118	0.0964761	0.800029	0.0960267	0.796928	0.0963051	0.808536	0.0977086	0.797329	0.0965626	0.799441	0.0967229	0.800248	0.096803	0.800924	0.0969611	0.793344	0.0962451	0.793049	0.0955443	0.801973	0.096595
		0.8051	0.09772	0.78939	0.0957718	0.798236	0.0966214	0.807125	0.0974717	0.816058	0.0983227	0.825035	0.0991743	0.834057	0.100027	0.843123	0.100879	0.825556	0.099443	0.825556	0.0992626	0.825556	0.0996233			0.800975	0.09698	0.801341	0.0964025	0.800229	0.0959684	0.797154	0.096203	0.808741	0.0976374	0.797537	0.0964811	0.799662	0.0966332	0.800462	0.096721	0.801149	0.0968709	0.793571	0.0961376	0.793271	0.0954588	0.802197	0.0965006
		0.8059	0.09741	0.789594	0.0958058	0.798443	0.0966557	0.807335	0.0975064	0.816271	0.0983576	0.825251	0.0992096	0.834276	0.100062	0.843345	0.100915	0.827986	0.0996733	0.827986	0.0994925	0.827986	0.0998541			0.801587	0.0969335	0.801982	0.0963762	0.800808	0.0959535	0.797801	0.096145	0.809328	0.0976093	0.798134	0.0964423	0.800296	0.0965884	0.801079	0.0966834	0.801796	0.0968268	0.794221	0.0960738	0.793908	0.0954189	0.802842	0.0964512
		0.8178	0.09868	0.789665	0.0958428	0.798514	0.0966931	0.807407	0.097544	0.816344	0.0983957	0.825325	0.0992479	0.83435	0.100101	0.843421	0.100954	0.830419	0.0999037	0.830419	0.0997225	0.830419	0.100085			0.802582	0.0969314	0.803026	0.0963981	0.80175	0.0959825	0.798852	0.0961326	0.810284	0.0976252	0.799104	0.0964475	0.801325	0.0965897	0.802081	0.0966913	0.802847	0.09683	0.795278	0.0960554	0.794943	0.0954256	0.803889	0.0964481
		0.8154	0.09855	ConcTikEll	ConcTikEll	ConcTikEll	ConcTikEll	ConcTikEll	ConcTikEll	ConcTikEll	ConcTikEll	ConcTikEll	ConcTikEll	ConcTikEll	ConcTikEll	ConcTikEll	ConcTikEll	0.832855	0.100134	0.832855	0.0999525	0.832855	0.100316			0.803931	0.0969737	0.804442	0.0964674	0.803028	0.0960545	0.800277	0.0961663	0.81158	0.0976846	0.80042	0.0964963	0.802722	0.0966372	0.80344	0.0967444	0.804272	0.0968803	0.796711	0.0960831	0.796348	0.0954789	0.805311	0.0964915
		0.8146	0.09805															0.835295	0.100365	0.835295	0.100183	0.835295	0.100547			0.805599	0.0970593	0.806193	0.0965824	0.804609	0.0961676	0.802039	0.0962451	0.813183	0.0977858	0.802046	0.0965876	0.804448	0.0967294	0.805121	0.0968413	0.806034	0.0969765	0.798483	0.0961559	0.798085	0.0955772	0.807067	0.0965801
		0.8132	0.09804															0.837738	0.100595	0.837738	0.100413	0.837738	0.100778			0.80754	0.0971858	0.80823	0.0967399	0.806448	0.0963186	0.804089	0.0963669	0.815048	0.0979262	0.803939	0.0967187	0.806457	0.096864	0.807076	0.0969794	0.808084	0.0971159	0.800544	0.0962719	0.800105	0.0957178	0.809111	0.0967115
		0.8085	0.09786															0.840184	0.100826	0.840184	0.100643	0.840184	0.101009			0.809701	0.0973498	0.810498	0.0969356	0.808496	0.0965035	0.806371	0.0965283	0.817124	0.0981019	0.806045	0.0968861	0.808693	0.0970371	0.809253	0.0971548	0.810367	0.0972946	0.802838	0.096428	0.802355	0.095897	0.811387	0.0968822
		0.8231	0.09861															0.842633	0.101057	0.842633	0.100873	0.842633	0.10124			0.812022	0.0975469	0.812935	0.0971641	0.810697	0.0967172	0.808823	0.0967249	0.819356	0.098308	0.808309	0.0970853	0.811096	0.0972442	0.811592	0.0973629	0.812819	0.0975079	0.805303	0.0966198	0.804772	0.0961097	0.813831	0.0970874
		IsoLine	IsoLine															0.845085	0.101287	0.845085	0.101103	0.845085	0.101471			0.814441	0.0977715	0.815476	0.0974192	0.81299	0.0969539	0.811378	0.0969515	0.821681	0.0985391	0.810668	0.0973108	0.8136	0.0974796	0.81403	0.0975978	0.815375	0.0977499	0.807872	0.0968422	0.807291	0.0963504	0.816379	0.0973216
																		0.847541	0.101518	0.847541	0.101334	0.847541	0.101702			0.816892	0.0980177	0.818049	0.097694	0.815314	0.0972072	0.813966	0.0972017	0.824037	0.0987887	0.813058	0.0975565	0.816136	0.0977367	0.816499	0.0978533	0.817964	0.098014	0.810475	0.0970891	0.809842	0.0966123	0.81896	0.0975785
																		0.85	0.101749	0.85	0.101564	0.85	0.101933			0.819308	0.0982786	0.820586	0.097981	0.817605	0.09747	0.816517	0.0974687	0.826359	0.0990501	0.815414	0.0978156	0.818637	0.0980087	0.818933	0.0981224	0.820515	0.0982929	0.813039	0.0973538	0.812358	0.0968883	0.821504	0.0978509
																		0.85	0.101749	0.85	0.101564	0.85	0.101933			0.821622	0.0985472	0.823017	0.0982723	0.8198	0.0977354	0.818961	0.0977454	0.828584	0.0993161	0.817671	0.0980811	0.821032	0.0982881	0.821266	0.0983976	0.82296	0.0985792	0.815497	0.097629	0.814768	0.0971709	0.823941	0.0981314
																		IsoLine	IsoLine	ConcBand	ConcBand	ConcBand	ConcBand			0.823772	0.0988162	0.825275	0.09856	0.82184	0.0979959	0.821232	0.0980241	0.830651	0.0995795	0.819768	0.0983458	0.823258	0.0985673	0.823432	0.0986716	0.825232	0.0988649	0.81778	0.0979072	0.817007	0.0974524	0.826206	0.0984125
																										0.825699	0.0990782	0.827299	0.0988362	0.823669	0.0982445	0.823267	0.0982972	0.832504	0.0998331	0.821647	0.0986024	0.825252	0.0988386	0.825375	0.0989368	0.827268	0.0991423	0.819826	0.0981808	0.819014	0.0977251	0.828236	0.0986864
																										0.827351	0.099326	0.829035	0.0990935	0.825236	0.0984745	0.825011	0.0985573	0.834092	0.10007	0.823258	0.0988439	0.826962	0.0990947	0.827039	0.0991859	0.829013	0.0994039	0.821579	0.0984425	0.820734	0.0979815	0.829975	0.0989457
																										0.828682	0.099553	0.830434	0.0993247	0.8265	0.0986795	0.826417	0.0987973	0.835373	0.100284	0.824557	0.0990638	0.82834	0.0993285	0.828381	0.0994123	0.83042	0.0996424	0.822992	0.0986849	0.82212	0.0982148	0.831377	0.0991833
																										0.829657	0.0997528	0.831458	0.0995236	0.827426	0.098854	0.827446	0.0990106	0.83631	0.100468	0.825507	0.099256	0.829349	0.0995338	0.829363	0.0996097	0.831449	0.0998514	0.824027	0.0989016	0.823135	0.0984184	0.832403	0.0993927
																										0.830247	0.0999202	0.83208	0.0996848	0.827988	0.0989932	0.82807	0.0991915	0.836879	0.100619	0.826084	0.0994154	0.82996	0.0997049	0.829959	0.0997728	0.832073	0.100025	0.824654	0.0990867	0.823751	0.0985869	0.833026	0.0995682
																										0.830439	0.10005	0.832282	0.0998039	0.828171	0.0990933	0.828272	0.0993349	0.837064	0.100731	0.826271	0.0995374	0.830159	0.0998371	0.830152	0.099897	0.832276	0.100159	0.824856	0.0992349	0.823951	0.0987157	0.833227	0.099705
																										Black	Black	Black	Black	Black	Black	Black	Black	Black	Black	Black	Black	Black	Black	Black	Black	Black	Black	Black	Black	Black	Black	Black	Black
[truncated: 34 more columns]

## Sheet: PlotDat4
Source sheet	Table S2	0.8125	0.09838	0.789665	0.0958428	0.798514	0.0966931	0.807407	0.097544	0.816344	0.0983957	0.825325	0.0992479	0.83435	0.100101	0.843421	0.100954	0.78	0.0950753	0.781002	0.095	0.78	0.0952474	0.787935	0.0958428	0.824685	0.0996561	0.822734	0.0989913	0.830789	0.100428	0.832175	0.100248	0.81433	0.0982017	0.827455	0.0992262	0.828076	0.100128	0.822115	0.0992297	0.835997	0.099948	0.823661	0.0992622	0.813624	0.0989326	0.822511	0.0991424
Plot name	Concordia0	0.8099	0.09783	0.789627	0.0958701	0.798475	0.0967207	0.807368	0.0975719	0.816304	0.0984237	0.825285	0.0992763	0.83431	0.100129	0.84338	0.100983	0.78	0.0950753	0.782104	0.0951066	0.78	0.0952474	0.796761	0.0966931	0.82451	0.0997212	0.8226	0.0990731	0.830585	0.100497	0.832043	0.100322	0.814202	0.0982761	0.827321	0.0993107	0.827945	0.100201	0.821982	0.0993145	0.835864	0.100022	0.823484	0.0993435	0.813492	0.0990069	0.82238	0.0992169
Plot Type	1	0.8108	0.0982	0.789515	0.0958962	0.798362	0.096747	0.807253	0.0975985	0.816188	0.0984506	0.825167	0.0993033	0.834191	0.100157	0.843259	0.101011	0.782104	0.0952791	0.78421	0.09531	0.782104	0.0954516	0.805631	0.097544	0.824008	0.0997497	0.82222	0.0991306	0.829995	0.100521	0.831668	0.100371	0.813836	0.0983264	0.82694	0.0993716	0.827572	0.100248	0.821602	0.0993756	0.835485	0.100071	0.822978	0.0993904	0.813118	0.0990559	0.822006	0.0992665
1st free col	61	0.8195	0.09903	0.789334	0.09592	0.798179	0.096771	0.807068	0.0976227	0.816	0.098475	0.824977	0.099328	0.833998	0.100182	0.843063	0.101036	0.78421	0.0954829	0.786319	0.0955134	0.78421	0.0956557	0.814544	0.0983957	0.823192	0.0997408	0.8216	0.0991628	0.829032	0.1005	0.831055	0.100393	0.81324	0.0983517	0.826319	0.0994078	0.826964	0.10027	0.820982	0.0994119	0.834867	0.100094	0.822156	0.0994015	0.812508	0.0990788	0.821397	0.0992903
Sigma Level	2	0.802	0.09704	0.789092	0.0959404	0.797934	0.0967916	0.806819	0.0976435	0.815748	0.098496	0.824721	0.0993492	0.833739	0.100203	0.842801	0.101058	0.786319	0.0956867	0.78843	0.0957169	0.786319	0.09586	0.823501	0.0992479	0.822084	0.0996948	0.820752	0.0991691	0.827713	0.100435	0.830218	0.100389	0.812426	0.0983515	0.82547	0.0994184	0.826133	0.100265	0.820136	0.0994227	0.834021	0.10009	0.82104	0.0993765	0.811674	0.099075	0.820563	0.0992879
Absolute Errs	FALSE	0.8146	0.0981	0.7888	0.0959565	0.797638	0.0968079	0.806519	0.0976599	0.815444	0.0985126	0.824413	0.0993659	0.833427	0.10022	0.842485	0.101075	0.78843	0.0958906	0.790544	0.0959205	0.78843	0.0960642	0.832503	0.100101	0.820714	0.099613	0.819692	0.0991493	0.826066	0.100325	0.829172	0.100358	0.811408	0.0983258	0.824409	0.0994035	0.825096	0.100234	0.819078	0.0994077	0.832965	0.10006	0.819662	0.0993162	0.810632	0.0990446	0.819523	0.0992592
Symbol Type	1	0.8155	0.09891	0.78847	0.0959677	0.797303	0.0968192	0.80618	0.0976713	0.8151	0.098524	0.824065	0.0993775	0.833074	0.100232	0.842127	0.101086	0.790544	0.0960945	0.792661	0.0961241	0.790544	0.0962685	0.841549	0.100954	0.819121	0.0994975	0.818442	0.0991038	0.824121	0.100175	0.827937	0.100302	0.810207	0.098275	0.823157	0.0993631	0.823871	0.100177	0.81783	0.0993673	0.831719	0.100004	0.818058	0.0992222	0.809402	0.0989882	0.818294	0.0992048
Inverse Plot	FALSE	0.8093	0.0981	0.788116	0.0959734	0.796944	0.0968249	0.805816	0.0976771	0.814732	0.0985299	0.823692	0.0993834	0.832696	0.100238	0.841745	0.101092	0.792661	0.0962985	0.794779	0.0963277	0.792661	0.0964729	IsoLine	IsoLine	0.817347	0.0993516	0.817026	0.0990335	0.821918	0.0999856	0.826539	0.100221	0.808847	0.0982002	0.821739	0.0992982	0.822483	0.100095	0.816416	0.0993022	0.830307	0.0999232	0.816273	0.099097	0.808009	0.098907	0.816903	0.0991258
Color Plot	TRUE	0.8232	0.09873	0.787755	0.0959734	0.796578	0.0968249	0.805445	0.0976771	0.814356	0.0985299	0.823311	0.0993834	0.83231	0.100238	0.841353	0.101092	0.794779	0.0965025	0.796901	0.0965313	0.794779	0.0966773			0.81544	0.0991791	0.815472	0.0989398	0.819497	0.0997617	0.825003	0.100116	0.807353	0.0981028	0.820181	0.09921	0.82096	0.0999906	0.814863	0.0992137	0.828757	0.0998191	0.814355	0.098944	0.80648	0.0988025	0.815375	0.0990237
3D plot	FALSE	0.8114	0.09808	0.787401	0.0959677	0.79622	0.0968192	0.805082	0.0976713	0.813988	0.098524	0.822938	0.0993775	0.831932	0.100232	0.840971	0.101086	0.796901	0.0967065	0.799025	0.096735	0.796901	0.0968817			0.813454	0.0989848	0.813808	0.0988245	0.816908	0.0995075	0.823361	0.0999907	0.805755	0.0979847	0.818515	0.0991001	0.81933	0.0998649	0.813202	0.0991036	0.827099	0.0996938	0.812356	0.0987675	0.804844	0.0986767	0.813741	0.0989005
Linear	FALSE	0.801	0.09771	0.787071	0.0959565	0.795885	0.0968079	0.804743	0.0976599	0.813644	0.0985126	0.82259	0.0993659	0.831579	0.10022	0.840613	0.101075	0.799025	0.0969106	0.801151	0.0969387	0.799025	0.0970861			0.811441	0.0987741	0.812069	0.0986899	0.8142	0.0992278	0.821643	0.0998465	0.804084	0.0978482	0.816773	0.0989708	0.817626	0.0997206	0.811466	0.0989739	0.825364	0.0995498	0.810331	0.0985723	0.803133	0.0985321	0.812032	0.0987586
Data Range	AC580:AG595	0.8099	0.09794	0.786778	0.0959404	0.795589	0.0967916	0.804442	0.0976435	0.81334	0.098496	0.822281	0.0993492	0.831267	0.100203	0.840297	0.101058	0.801151	0.0971147	0.80328	0.0971425	0.801151	0.0972906			0.809458	0.0985526	0.810287	0.0985385	0.811425	0.0989281	0.819883	0.0996864	0.802372	0.097696	0.814989	0.0988246	0.81588	0.0995605	0.809687	0.0988272	0.823588	0.0993898	0.808335	0.0983636	0.801381	0.0983715	0.810281	0.0986008
Filled Symbols	FALSE	0.8118	0.09831	0.786536	0.09592	0.795343	0.096771	0.804194	0.0976227	0.813088	0.098475	0.822026	0.099328	0.831008	0.100182	0.840035	0.101036	0.80328	0.0973188	0.805411	0.0973463	0.80328	0.0974952			0.807557	0.0983263	0.808498	0.0983733	0.808638	0.0986142	0.818116	0.0995135	0.800653	0.0975311	0.813197	0.0986642	0.814127	0.0993877	0.8079	0.0986663	0.821804	0.0992169	0.806423	0.0981472	0.799621	0.098198	0.808523	0.0984302
ConcAge	TRUE	0.8193	0.09879	0.786356	0.0958962	0.79516	0.096747	0.804008	0.0975985	0.8129	0.0984506	0.821836	0.0993033	0.830815	0.100157	0.839839	0.101011	0.805411	0.097523	0.807545	0.0975501	0.805411	0.0976998			0.805791	0.0981016	0.806737	0.0981976	0.805894	0.0982923	0.816376	0.0993313	0.798961	0.0973565	0.811432	0.0984928	0.812401	0.0992056	0.806141	0.0984944	0.820047	0.0990346	0.804646	0.0979289	0.797888	0.098015	0.806792	0.0982499
ConcSwap	FALSE	0.8147	0.09761	0.786244	0.0958701	0.795047	0.0967207	0.803894	0.0975719	0.812784	0.0984237	0.821718	0.0992763	0.830696	0.100129	0.839718	0.100983	0.807545	0.0977272	0.809681	0.097754	0.807545	0.0979044			0.804209	0.0978844	0.805036	0.0980147	0.803245	0.0979685	0.814697	0.0991431	0.797327	0.0971758	0.809729	0.0983139	0.810734	0.0990178	0.804443	0.0983149	0.818352	0.0988464	0.803054	0.0977148	0.796215	0.0978261	0.805121	0.0980637
1st Symbol-row	1	0.8066	0.09847	0.786206	0.0958428	0.795009	0.0966931	0.803855	0.097544	0.812745	0.0983957	0.821678	0.0992479	0.830656	0.100101	0.839677	0.100954	0.809681	0.0979315	0.81182	0.0979579	0.809681	0.098109			0.802852	0.0976808	0.803431	0.0978282	0.800743	0.0976493	0.813111	0.0989528	0.795785	0.0969925	0.80812	0.0981307	0.809161	0.0988279	0.80284	0.0981311	0.816751	0.0986559	0.801689	0.0975106	0.794636	0.0976349	0.803543	0.0978751
		IsoLine	IsoLine	0.786244	0.0958155	0.795047	0.0966655	0.803894	0.0975162	0.812784	0.0983676	0.821718	0.0992196	0.830696	0.100072	0.839718	0.100926	0.81182	0.0981358	0.813962	0.0981619	0.81182	0.0983137			0.801758	0.0974962	0.801951	0.0976417	0.798436	0.0973408	0.81165	0.0987639	0.794363	0.0968101	0.806638	0.0979469	0.807711	0.0986396	0.801362	0.0979468	0.815275	0.0984668	0.80059	0.097322	0.793181	0.0974452	0.802089	0.0976877
				0.786356	0.0957894	0.79516	0.0966392	0.804008	0.0974896	0.8129	0.0983408	0.821836	0.0991925	0.830815	0.100045	0.839839	0.100898	0.813962	0.0983401	0.816106	0.0983659	0.813962	0.0985184			0.800958	0.0973358	0.800626	0.0974589	0.796371	0.097049	0.810341	0.0985803	0.79309	0.0966322	0.805311	0.0977662	0.806413	0.0984565	0.80004	0.0977654	0.813954	0.0982829	0.799785	0.097154	0.791878	0.0972606	0.800788	0.0975052
				0.786536	0.0957656	0.795343	0.0966152	0.804194	0.0974654	0.813088	0.0983163	0.822026	0.0991679	0.831008	0.10002	0.840035	0.100873	0.816106	0.0985445	0.818252	0.0985699	0.816106	0.0987232			0.800472	0.0972038	0.799482	0.0972833	0.794586	0.0967796	0.809211	0.0984054	0.791991	0.0964622	0.804165	0.0975919	0.805292	0.0982823	0.798897	0.0975906	0.812813	0.0981077	0.799297	0.0970113	0.790752	0.0970848	0.799663	0.0973312
				0.786778	0.0957452	0.795589	0.0965946	0.804442	0.0974446	0.81334	0.0982953	0.822281	0.0991467	0.831267	0.0999987	0.840297	0.100851	0.818252	0.0987489	0.820402	0.0987739	0.818252	0.098928			0.800315	0.0971039	0.79854	0.0971184	0.793117	0.0965379	0.808281	0.0982426	0.791086	0.0963034	0.803222	0.0974275	0.804369	0.0981203	0.797957	0.0974256	0.811873	0.0979445	0.799139	0.0968978	0.789826	0.0969212	0.798738	0.097169
				0.787071	0.0957291	0.795885	0.0965783	0.804743	0.0974282	0.813644	0.0982788	0.82259	0.09913	0.831579	0.0999818	0.840613	0.100834	0.820402	0.0989534	0.822553	0.098978	0.820402	0.0991328			0.80049	0.0970388	0.79782	0.0969673	0.791991	0.0963285	0.807569	0.0980952	0.790394	0.096159	0.8025	0.0972762	0.803663	0.0979737	0.797237	0.0972738	0.811155	0.0977967	0.799316	0.0968165	0.789117	0.0967729	0.798029	0.0970219
				0.787401	0.0957179	0.79622	0.096567	0.805082	0.0974168	0.813988	0.0982673	0.822938	0.0991184	0.831932	0.0999702	0.840971	0.100823	0.822553	0.0991579	0.824707	0.0991822	0.822553	0.0993377			0.800992	0.0970103	0.797334	0.096833	0.791233	0.0961556	0.80709	0.0979659	0.789927	0.0960318	0.802013	0.0971409	0.803187	0.0978453	0.796752	0.0971381	0.810671	0.097667	0.799822	0.0967696	0.78864	0.0966428	0.797552	0.0968926
				0.787755	0.0957122	0.796578	0.0965613	0.805445	0.097411	0.814356	0.0982614	0.823311	0.0991125	0.83231	0.0999642	0.841353	0.100817	0.824707	0.0993624	0.826864	0.0993864	0.824707	0.0995426			0.801808	0.0970192	0.797093	0.0967181	0.790854	0.0960224	0.806852	0.0978574	0.789696	0.0959241	0.801772	0.0970243	0.802951	0.0977376	0.796512	0.0970211	0.81043	0.0975581	0.800644	0.0967585	0.788403	0.0965335	0.797316	0.0967837
				0.788116	0.0957122	0.796944	0.0965613	0.805816	0.097411	0.814732	0.0982614	0.823692	0.0991125	0.832696	0.0999642	0.841745	0.100817	0.826864	0.099567	0.829023	0.0995906	0.826864	0.0997476			0.802916	0.0970652	0.797102	0.0966249	0.790865	0.0959316	0.80686	0.0977717	0.789704	0.0958382	0.801781	0.0969287	0.802959	0.0976527	0.79652	0.0969251	0.810438	0.0974719	0.80176	0.0967835	0.788411	0.0964472	0.797324	0.0966973
				0.78847	0.0957179	0.797303	0.096567	0.80618	0.0974168	0.8151	0.0982673	0.824065	0.0991184	0.833074	0.0999702	0.842127	0.100823	0.829023	0.0997716	0.831185	0.0997948	0.829023	0.0999526			0.804286	0.097147	0.797359	0.0965551	0.791263	0.095885	0.807114	0.0977105	0.789952	0.0957757	0.802038	0.0968558	0.803212	0.0975923	0.796778	0.0968519	0.810695	0.0974102	0.803138	0.0968438	0.788665	0.0963854	0.797577	0.0966351
				0.7888	0.0957291	0.797638	0.0965783	0.806519	0.0974282	0.815444	0.0982788	0.824413	0.09913	0.833427	0.0999818	0.842485	0.100834	0.831185	0.0999762	0.833349	0.0999991	0.831185	0.100158			0.805879	0.0972625	0.797861	0.0965101	0.792041	0.0958834	0.80761	0.097675	0.790433	0.0957377	0.802541	0.0968072	0.803703	0.0975576	0.797279	0.0968031	0.811195	0.0973742	0.804742	0.0969378	0.789158	0.0963493	0.79807	0.0965983
				0.789092	0.0957452	0.797934	0.0965946	0.806819	0.0974446	0.815748	0.0982953	0.824721	0.0991467	0.833739	0.0999987	0.842801	0.100851	0.833349	0.100181	0.835516	0.100203	0.833349	0.100363			0.807653	0.0974084	0.798597	0.0964908	0.793185	0.0959269	0.808336	0.0976658	0.791141	0.0957252	0.803278	0.0967837	0.804424	0.0975491	0.798014	0.0967795	0.811929	0.0973646	0.806527	0.097063	0.789882	0.0963398	0.798793	0.0965876
				0.789334	0.0957656	0.798179	0.0966152	0.807068	0.0974654	0.816	0.0983163	0.824977	0.0991679	0.833998	0.10002	0.843063	0.100873	0.835516	0.100386	0.837686	0.100408	0.835516	0.100568			0.80956	0.0975809	0.799553	0.0964976	0.794671	0.0960147	0.80928	0.0976832	0.792059	0.0957382	0.804235	0.0967858	0.805361	0.0975672	0.798968	0.0967816	0.812882	0.0973816	0.808445	0.097216	0.790823	0.0963569	0.799732	0.0966032
				0.789515	0.0957894	0.798362	0.0966392	0.807253	0.0974896	0.816188	0.0983408	0.825167	0.0991925	0.834191	0.100045	0.843259	0.100898	0.837686	0.10059	0.839858	0.100612	0.837686	0.100773			0.811546	0.0977752	0.80071	0.0965303	0.796471	0.096145	0.810423	0.0977269	0.793171	0.0957765	0.805395	0.0968135	0.806495	0.0976114	0.800124	0.0968093	0.814036	0.0974248	0.810444	0.0973925	0.791961	0.0964004	0.80087	0.0966449
				0.789627	0.0958155	0.798475	0.0966655	0.807368	0.0975162	0.816304	0.0983676	0.825285	0.0992196	0.83431	0.100072	0.84338	0.100926	0.839858	0.100795	0.842032	0.100817	0.839858	0.100978			0.813559	0.0979859	0.802046	0.0965883	0.798551	0.0963153	0.811743	0.0977958	0.794455	0.0958395	0.806733	0.0968663	0.807804	0.0976809	0.801458	0.0968622	0.815368	0.0974934	0.812469	0.0975877	0.793275	0.0964694	0.802183	0.0967117
				0.789665	0.0958428	0.798514	0.0966931	0.807407	0.097544	0.816344	0.0983957	0.825325	0.0992479	0.83435	0.100101	0.843421	0.100954	0.842032	0.101	0.843984	0.101	0.84009	0.101			0.815542	0.0982074	0.803536	0.0966705	0.800868	0.0965223	0.813214	0.0978888	0.795885	0.0959258	0.808225	0.0969431	0.809263	0.0977743	0.802945	0.0969392	0.816852	0.0975861	0.814465	0.0977964	0.79474	0.0965625	0.803646	0.0968025
				ConcTikEll	ConcTikEll	ConcTikEll	ConcTikEll	ConcTikEll	ConcTikEll	ConcTikEll	ConcTikEll	ConcTikEll	ConcTikEll	ConcTikEll	ConcTikEll	ConcTikEll	ConcTikEll	0.842032	0.101	ConcBand	ConcBand	ConcBand	ConcBand			0.817443	0.0984337	0.805148	0.0967752	0.803379	0.0967619	0.814807	0.098004	0.797435	0.0960338	0.80984	0.0970424	0.810844	0.0978898	0.804556	0.0970388	0.818461	0.0977011	0.816377	0.0980128	0.796327	0.0966779	0.805231	0.0969154
																		IsoLine	IsoLine							0.819209	0.0986584	0.806854	0.0969005	0.806035	0.0970295	0.816491	0.0981392	0.799073	0.0961614	0.811548	0.0971622	0.812515	0.0980251	0.806259	0.097159	0.820161	0.097836	0.818154	0.0982311	0.798004	0.0968134	0.806906	0.0970483
																										0.820791	0.0988756	0.808619	0.0970439	0.808783	0.0973199	0.818234	0.0982917	0.800769	0.0963061	0.813316	0.0973004	0.814244	0.0981777	0.808021	0.0972975	0.821921	0.0979884	0.819746	0.0984452	0.79974	0.0969664	0.808641	0.0971985
																										0.822148	0.0990792	0.810408	0.0972026	0.81157	0.0976275	0.820001	0.0984586	0.802488	0.0964651	0.815109	0.097454	0.815998	0.0983445	0.809808	0.0974517	0.823705	0.0981552	0.821111	0.0986494	0.8015	0.0971339	0.810399	0.0973631
																										0.823242	0.0992638	0.812188	0.0973734	0.814343	0.0979462	0.821759	0.0986366	0.804198	0.0966352	0.816891	0.0976203	0.817742	0.0985224	0.811585	0.0976185	0.82548	0.0983332	0.82221	0.098838	0.803251	0.0973125	0.812148	0.097539
																										0.824042	0.0994242	0.813923	0.0975532	0.817046	0.0982698	0.823473	0.0988223	0.805865	0.0968133	0.81863	0.0977959	0.819442	0.0987078	0.813318	0.0977946	0.82721	0.098519	0.823015	0.099006	0.804958	0.097499	0.813853	0.0977226
																										0.824528	0.0995562	0.81558	0.0977384	0.819628	0.098592	0.825109	0.099012	0.807457	0.0969957	0.820289	0.0979774	0.821066	0.0988971	0.814972	0.0979767	0.828863	0.0987088	0.823503	0.0991487	0.806588	0.0976895	0.815481	0.0979105
																										0.824685	0.0996561	0.817127	0.0979253	0.822038	0.0989067	0.826637	0.0992021	0.808943	0.097179	0.821838	0.0981613	0.822581	0.0990867	0.816516	0.0981612	0.830405	0.098899	0.823661	0.0992622	0.808109	0.0978804	0.817001	0.098099
																										Black	Black	0.818532	0.0981104	0.824229	0.0992076	0.828025	0.0993888	0.810293	0.0973596	0.823246	0.098344	0.823958	0.0992728	0.81792	0.0983445	0.831806	0.099086	Black	Black	0.809491	0.098068	0.818382	0.0982844
																												0.81977	0.09829	0.826159	0.0994888	0.829248	0.0995685	0.811483	0.097534	0.824486	0.098522	0.825171	0.0994519	0.819156	0.098523	0.833041	0.099266			0.810709	0.0982486	0.819598	0.0984631
																												0.820816	0.0984607	0.82779	0.099745	0.83028	0.0997377	0.812487	0.0976988	0.825533	0.0986917	0.826196	0.0996204	0.8202	0.0986934	0.834084	0.0994356			0.811737	0.0984187	0.820626	0.0986316
																												0.821649	0.0986191	0.829091	0.0999711	0.831103	0.0998932	0.813288	0.0978508	0.826368	0.09885	0.827012	0.0997751	0.821032	0.0988521	0.834914	0.0995915			0.812557	0.0985751	0.821445	0.0987866
																												0.822253	0.0987621	0.830035	0.100163	0.8317	0.100032	0.813868	0.0979869	0.826974	0.0989936	0.827605	0.099913	0.821635	0.0989962	0.835517	0.0997306			0.813151	0.0987146	0.822039	0.0989252
																												0.822617	0.098887	0.830605	0.100316	0.83206	0.100151	0.814218	0.0981047	0.827338	0.0991198	0.827961	0.100031	0.821999	0.0991229	0.835881	0.0998502			0.813509	0.0988346	0.822396	0.0990446
																												0.822734	0.0989913	0.830789	0.100428	0.832175	0.100248	0.81433	0.0982017	0.827455	0.0992262	0.828076	0.100128	0.822115	0.0992297	0.835997	0.099948			0.813624	0.0989326	0.822511	0.0991424
																												Black	Black	Black	Black	Black	Black	Black	Black	Black	Black	Black	Black	Black	Black	Black	Black			Black	Black	Black	Black
[truncated: 10 more columns]

## Sheet: PlotDat5
Source sheet	Table S2	0.8103	0.09804	0.754701	0.0924482	0.772097	0.0941442	0.789665	0.0958428	0.807407	0.097544	0.825325	0.0992479	0.843421	0.100954	0.861696	0.102664	0.880152	0.104375	0.75	0.0921474	0.75	0.0919808	0.75	0.0923139	0.735883	0.0907549	0.835247	0.100883	0.837461	0.100976	0.841906	0.101789	0.842848	0.101789	0.827559	0.099571	0.832693	0.1005	0.836806	0.0999163	0.835233	0.100571	0.858921	0.103273	0.811835	0.0988033	0.824924	0.0992506
Plot name	Concordia0	0.8127	0.09812	0.754635	0.0924839	0.772028	0.0941805	0.789594	0.0958798	0.807335	0.0975817	0.825251	0.0992863	0.843345	0.100994	0.861618	0.102703	0.880072	0.104416	0.75	0.0921474	0.75	0.0919808	0.75	0.0923139	0.753063	0.0924482	0.834894	0.10096	0.836905	0.101041	0.841346	0.101869	0.842287	0.101861	0.827007	0.0996382	0.832342	0.100577	0.83643	0.100065	0.834875	0.100664	0.858555	0.103366	0.811493	0.0988807	0.824372	0.0993297
Plot Type	1	0.817	0.09894	0.754441	0.0925166	0.771829	0.0942139	0.78939	0.0959138	0.807125	0.0976164	0.825035	0.0993216	0.843123	0.101029	0.861391	0.10274	0.879839	0.104453	0.754329	0.0925725	0.754329	0.0924051	0.754329	0.0927399	0.770413	0.0941442	0.833869	0.100957	0.835292	0.100978	0.839721	0.101821	0.840661	0.101804	0.825407	0.0995791	0.831324	0.100576	0.835349	0.100136	0.833842	0.100679	0.857498	0.103377	0.810501	0.0988806	0.822773	0.0992834
1st free col	85	0.8179	0.09892	0.754136	0.0925438	0.771516	0.0942416	0.789068	0.0959421	0.806794	0.0976451	0.824695	0.0993509	0.842775	0.101059	0.861033	0.10277	0.879472	0.104484	0.75867	0.0929978	0.75867	0.0928296	0.75867	0.093166	0.787935	0.0958428	0.832202	0.100874	0.83269	0.100791	0.837103	0.101648	0.83804	0.101622	0.822827	0.0993964	0.829667	0.100495	0.833593	0.100129	0.832161	0.100615	0.855778	0.103308	0.808888	0.098803	0.820195	0.0991137
Sigma Level	2	0.803	0.09675	0.753743	0.0925633	0.771113	0.0942615	0.788654	0.0959623	0.806369	0.0976657	0.824259	0.0993718	0.842326	0.101081	0.860573	0.102792	0.879	0.104506	0.76302	0.0934233	0.76302	0.0932543	0.76302	0.0935923	0.805631	0.097544	0.829938	0.100714	0.829216	0.100487	0.833607	0.101356	0.834538	0.101321	0.81938	0.0990981	0.827416	0.100337	0.83121	0.100043	0.829878	0.100473	0.853442	0.103159	0.806697	0.09865	0.816753	0.098828
Absolute Errs	FALSE	0.8079	0.09768	0.753296	0.0925734	0.770653	0.0942718	0.788181	0.0959728	0.805884	0.0976765	0.823761	0.0993828	0.841815	0.101092	0.860048	0.102803	0.878462	0.104518	0.767382	0.0938489	0.767382	0.0936791	0.767382	0.0940187	0.823501	0.0992479	0.827137	0.100481	0.825019	0.10008	0.829385	0.100958	0.83031	0.100916	0.815218	0.0986971	0.824633	0.100107	0.828265	0.0998811	0.827056	0.100257	0.850554	0.102935	0.803987	0.0984259	0.812596	0.0984388
Symbol Type	1	0.8106	0.09725	0.75283	0.0925734	0.770174	0.0942718	0.787689	0.0959728	0.805378	0.0976765	0.823242	0.0993828	0.841283	0.101092	0.859502	0.102803	0.877901	0.104518	0.771754	0.0942747	0.771754	0.0941041	0.771754	0.0944453	0.841549	0.100954	0.823878	0.100182	0.820284	0.0995865	0.824622	0.100472	0.825539	0.100423	0.810521	0.098211	0.821394	0.0998106	0.824838	0.0996474	0.823771	0.0999731	0.847193	0.102642	0.800834	0.0981366	0.807905	0.0979631
Inverse Plot	FALSE	0.8101	0.09777	0.752382	0.0925633	0.769714	0.0942615	0.787217	0.0959623	0.804893	0.0976657	0.822744	0.0993718	0.840771	0.101081	0.858977	0.102792	0.877363	0.104506	0.776138	0.0947007	0.776138	0.0945293	0.776138	0.0948721	0.859775	0.102664	0.820248	0.099824	0.815218	0.0990292	0.819525	0.0999196	0.820434	0.0998643	0.805496	0.0976611	0.817786	0.0994562	0.821022	0.0993483	0.820114	0.0996293	0.84345	0.102288	0.797322	0.0977902	0.802887	0.0974217
Color Plot	TRUE	0.8332	0.1004	0.75199	0.0925438	0.769311	0.0942416	0.786803	0.0959421	0.804468	0.0976451	0.822307	0.0993509	0.840323	0.101059	0.858517	0.10277	0.876891	0.104484	0.780532	0.0951268	0.780532	0.0949546	0.780532	0.095299	0.878181	0.104375	0.816347	0.0994175	0.810041	0.0984322	0.814319	0.099324	0.815218	0.0992645	0.800362	0.0970713	0.813909	0.0990533	0.816923	0.098992	0.816183	0.0992348	0.839427	0.101882	0.793547	0.0973961	0.79776	0.0968383
3D plot	FALSE	0.7877	0.09604	0.751685	0.0925166	0.768997	0.0942139	0.786481	0.0959138	0.804137	0.0976164	0.821967	0.0993216	0.839974	0.101029	0.858159	0.10274	0.876524	0.104453	0.784937	0.0955531	0.784937	0.0953801	0.784937	0.0957261	IsoLine	IsoLine	0.81228	0.0989734	0.804981	0.0978216	0.809229	0.0987116	0.81012	0.0986497	0.795343	0.0964676	0.809868	0.098613	0.81265	0.0985881	0.812086	0.0988004	0.835235	0.101436	0.789613	0.0969649	0.792749	0.0962384
Linear	FALSE	0.8004	0.09646	0.751491	0.0924839	0.768798	0.0941805	0.786276	0.0958798	0.803927	0.0975817	0.821752	0.0992863	0.839753	0.100994	0.857932	0.102703	0.876291	0.104416	0.789353	0.0959796	0.789353	0.0958058	0.789353	0.0961534			0.80816	0.0985038	0.800258	0.097224	0.804479	0.0981093	0.805361	0.0980467	0.790659	0.0958761	0.805773	0.0981472	0.808322	0.0981478	0.807936	0.0983379	0.830987	0.100961	0.785627	0.0965085	0.788072	0.0956482
Data Range	AC681:AG708	0.8154	0.09896	0.751425	0.0924482	0.76873	0.0941442	0.786206	0.0958428	0.803855	0.097544	0.821678	0.0992479	0.839677	0.100954	0.857854	0.102664	0.876211	0.104375	0.793779	0.0964062	0.793779	0.0962316	0.793779	0.0965808			0.804098	0.0980216	0.796079	0.0966656	0.800276	0.0975432	0.801151	0.0974818	0.786514	0.0953229	0.801736	0.0976686	0.804056	0.0976829	0.803844	0.0978599	0.826799	0.100471	0.781698	0.0960393	0.783933	0.0950934
Filled Symbols	FALSE	0.8219	0.0993	0.751491	0.0924126	0.768798	0.0941079	0.786276	0.0958058	0.803927	0.0975064	0.821752	0.0992096	0.839753	0.100915	0.857932	0.102624	0.876291	0.104335	0.798217	0.096833	0.798217	0.0966576	0.798217	0.0970084			0.800206	0.0975399	0.792626	0.0961707	0.796804	0.0970381	0.797673	0.0969799	0.78309	0.094832	0.797868	0.0971904	0.799969	0.0972063	0.799923	0.0973794	0.822786	0.0999795	0.777932	0.0955702	0.780515	0.0945984
ConcAge	TRUE	0.8079	0.09681	0.751685	0.0923798	0.768997	0.0940745	0.786481	0.0957718	0.804137	0.0974717	0.821967	0.0991743	0.839974	0.100879	0.858159	0.102587	0.876524	0.104298	0.802666	0.09726	0.802666	0.0970837	0.802666	0.0974362			0.796588	0.0970718	0.790051	0.0957611	0.794215	0.0966162	0.795078	0.0965627	0.780536	0.0944249	0.794273	0.0967256	0.796171	0.0967308	0.796279	0.0969096	0.819057	0.0994992	0.774432	0.0951139	0.777965	0.0941847
ConcSwap	FALSE	0.7916	0.09651	0.75199	0.0923526	0.769311	0.0940468	0.786803	0.0957435	0.804468	0.0974429	0.822307	0.099145	0.840323	0.10085	0.858517	0.102557	0.876891	0.104267	0.807125	0.0976871	0.807125	0.0975101	0.807125	0.0978641			0.793345	0.0966301	0.788465	0.0954545	0.792622	0.0962959	0.793482	0.0962485	0.778963	0.0941195	0.791049	0.0962867	0.792767	0.0962695	0.793012	0.0964632	0.815714	0.0990435	0.771295	0.0946828	0.776396	0.0938705
1st Symbol-row	1	0.8292	0.09974	0.752382	0.0923332	0.769714	0.0940269	0.787217	0.0957233	0.804893	0.0974224	0.822744	0.099124	0.840771	0.100828	0.858977	0.102535	0.877363	0.104245	0.811596	0.0981144	0.811596	0.0979365	0.811596	0.0982923			0.790564	0.0962269	0.787939	0.0952644	0.792094	0.0960911	0.792952	0.0960511	0.778441	0.093929	0.788286	0.0958859	0.78985	0.0958349	0.790212	0.0960525	0.812848	0.0986248	0.768605	0.0942887	0.775876	0.0936694
		0.825	0.09911	0.75283	0.092323	0.770174	0.0940166	0.787689	0.0957128	0.805378	0.0974116	0.823242	0.0991131	0.841283	0.100817	0.859502	0.102524	0.877901	0.104233	0.816078	0.0985419	0.816078	0.0983632	0.816078	0.0987205			0.788322	0.0958731	0.788495	0.0951991	0.792654	0.0960108	0.793513	0.095979	0.778993	0.0938618	0.786057	0.095534	0.787498	0.095439	0.787954	0.0956887	0.810537	0.0982545	0.766436	0.0939425	0.776428	0.0935903
		0.8033	0.09844	0.753296	0.092323	0.770653	0.0940166	0.788181	0.0957128	0.805884	0.0974116	0.823761	0.0991131	0.841815	0.100817	0.860048	0.102524	0.878462	0.104233	0.820571	0.0989695	0.820571	0.09879	0.820571	0.099149			0.786679	0.0955785	0.790108	0.0952615	0.794279	0.0960586	0.795139	0.0960355	0.780593	0.0939209	0.784424	0.0952407	0.785777	0.0950924	0.7863	0.0953816	0.808844	0.0979428	0.764847	0.0936534	0.778027	0.0936366
		0.8179	0.09831	0.753743	0.0923332	0.771113	0.0940269	0.788654	0.0957233	0.806369	0.0974224	0.824259	0.099124	0.842326	0.100828	0.860573	0.102535	0.879	0.104245	0.825075	0.0993973	0.825075	0.099217	0.825075	0.0995776			0.78568	0.095351	0.79271	0.0954488	0.796897	0.0962322	0.79776	0.0962181	0.783173	0.0941036	0.783432	0.0950138	0.784733	0.0948047	0.785295	0.0951397	0.807815	0.097698	0.763881	0.0934294	0.780605	0.0938063
		0.8162	0.09819	0.754136	0.0923526	0.771516	0.0940468	0.789068	0.0957435	0.806794	0.0974429	0.824695	0.099145	0.842775	0.10085	0.861033	0.102557	0.879472	0.104267	0.82959	0.0998252	0.82959	0.0996442	0.82959	0.100006			0.785353	0.0951968	0.796184	0.0957529	0.800393	0.0965242	0.801262	0.0965188	0.78662	0.0944019	0.783107	0.0948597	0.784394	0.0945837	0.784967	0.0949695	0.807479	0.097527	0.763565	0.0932767	0.784047	0.094092
		0.8135	0.09799	0.754441	0.0923798	0.771829	0.0940745	0.78939	0.0957718	0.807125	0.0974717	0.825035	0.0991743	0.843123	0.100879	0.861391	0.102587	0.879839	0.104298	0.834116	0.100253	0.834116	0.100071	0.834116	0.100435			0.785706	0.0951202	0.800381	0.0961604	0.804615	0.0969218	0.80549	0.0969244	0.790782	0.0948029	0.783458	0.0947826	0.78477	0.0944355	0.785325	0.0948757	0.807845	0.0974343	0.763907	0.0931993	0.788204	0.0944812
		0.8085	0.098	0.754635	0.0924126	0.772028	0.0941079	0.789594	0.0958058	0.807335	0.0975064	0.825251	0.0992096	0.843345	0.100915	0.861618	0.102624	0.880072	0.104335	0.838654	0.100682	0.838654	0.100499	0.838654	0.100864			0.786731	0.0951233	0.805116	0.0966535	0.809378	0.0974076	0.810261	0.0974172	0.795479	0.095289	0.784476	0.0947845	0.785851	0.094364	0.786358	0.0948608	0.808902	0.0974226	0.764899	0.0931994	0.792895	0.0949569
		0.8	0.09712	0.754701	0.0924482	0.772097	0.0941442	0.789665	0.0958428	0.807407	0.097544	0.825325	0.0992479	0.843421	0.100954	0.861696	0.102664	0.880152	0.104375	0.843203	0.10111	0.843203	0.100927	0.843203	0.101294			0.788398	0.0952059	0.810182	0.0972108	0.814475	0.0979604	0.815366	0.0979757	0.800504	0.0958389	0.786133	0.0948653	0.787607	0.0943712	0.788039	0.0949253	0.810622	0.097492	0.766512	0.093277	0.797913	0.0954983
		0.8161	0.09883	ConcTikEll	ConcTikEll	ConcTikEll	ConcTikEll	ConcTikEll	ConcTikEll	ConcTikEll	ConcTikEll	ConcTikEll	ConcTikEll	ConcTikEll	ConcTikEll	ConcTikEll	ConcTikEll	ConcTikEll	ConcTikEll	0.847763	0.101539	0.847763	0.101354	0.847763	0.101723			0.790662	0.0953658	0.815359	0.0978078	0.819681	0.098556	0.820582	0.0985755	0.805638	0.0964287	0.788384	0.095023	0.78999	0.0944569	0.790322	0.0950675	0.812958	0.0976408	0.768703	0.09343	0.80304	0.0960817
		0.8169	0.09883																	0.852334	0.101968	0.852334	0.101782	0.852334	0.102153			0.793463	0.0955986	0.820419	0.0984184	0.824771	0.0991684	0.82568	0.0991903	0.810657	0.0970324	0.791167	0.0952531	0.792935	0.0946189	0.793144	0.0952833	0.815846	0.0978648	0.771413	0.0936541	0.808051	0.0966816
		0.8074	0.09758																	0.856916	0.102397	0.856916	0.102211	0.856916	0.102582			0.796722	0.0958981	0.825142	0.099016	0.829521	0.0997707	0.830439	0.0997933	0.815341	0.0976239	0.794406	0.0955494	0.796362	0.0948526	0.796429	0.0955669	0.819207	0.098158	0.774566	0.0939434	0.812728	0.0972718
		0.8121	0.09843																	0.86151	0.102826	0.86151	0.102639	0.86151	0.103012			0.800352	0.096256	0.829321	0.0995744	0.833724	0.100337	0.834649	0.100358	0.819486	0.0981771	0.798014	0.0959038	0.800178	0.0951517	0.800086	0.0959107	0.82295	0.0985124	0.778078	0.0942898	0.816867	0.0978266
		IsoLine	IsoLine																	0.866116	0.103255	0.866116	0.103067	0.866116	0.103443			0.804253	0.0966625	0.832774	0.100069	0.837196	0.100842	0.838127	0.10086	0.82291	0.098668	0.801891	0.0963067	0.804277	0.095508	0.804017	0.0963052	0.826973	0.0989182	0.781853	0.0946839	0.820285	0.0983216
																				0.870732	0.103684	0.870732	0.103496	0.870732	0.103873			0.80832	0.0971066	0.835349	0.100479	0.839785	0.101264	0.840722	0.101277	0.825464	0.0990751	0.805932	0.096747	0.80855	0.0959119	0.808114	0.0967396	0.831165	0.0993644	0.785787	0.0951151	0.822835	0.0987353
																				0.87536	0.104114	0.87536	0.103925	0.87536	0.104303			0.81244	0.0975762	0.836935	0.100786	0.841378	0.101584	0.842318	0.101592	0.827037	0.0993805	0.810027	0.0972128	0.812878	0.0963522	0.812264	0.0972021	0.835413	0.0998389	0.789773	0.0955715	0.824404	0.0990495
																				0.88	0.104544	0.88	0.104354	0.88	0.104734			0.816502	0.0980584	0.837461	0.100976	0.841906	0.101789	0.842848	0.101789	0.827559	0.099571	0.814064	0.0976914	0.817144	0.0968171	0.816356	0.0976801	0.839601	0.100329	0.793702	0.0960407	0.824924	0.0992506
																				0.88	0.104544	0.88	0.104354	0.88	0.104734			0.820394	0.0985401	Black	Black	Black	Black	Black	Black	Black	Black	0.817932	0.0981696	0.821231	0.0972937	0.820277	0.0981606	0.843614	0.10082	0.797468	0.0965098	Black	Black
																				IsoLine	IsoLine	ConcBand	ConcBand	ConcBand	ConcBand			0.824012	0.0990082									0.821527	0.0986344	0.825029	0.0977692	0.823921	0.0986304	0.847343	0.101301	0.800968	0.0969661
																												0.827255	0.0994499									0.824751	0.0990733	0.828433	0.0982305	0.827188	0.0990768	0.850686	0.101756	0.804105	0.0973972
																												0.830036	0.0998531									0.827514	0.0994741	0.83135	0.0986651	0.829988	0.0994875	0.853552	0.102175	0.806795	0.0977913
																												0.832278	0.100207									0.829743	0.099826	0.833702	0.099061	0.832246	0.0998513	0.855863	0.102545	0.808964	0.0981375
																												0.833921	0.100502									0.831376	0.100119	0.835423	0.0994076	0.8339	0.100158	0.857556	0.102857	0.810553	0.0984266
																												0.83492	0.100729									0.832368	0.100346	0.836467	0.0996953	0.834905	0.1004	0.858585	0.103102	0.811519	0.0986506
																												0.835247	0.100883									0.832693	0.1005	0.836806	0.0999163	0.835233	0.100571	0.858921	0.103273	0.811835	0.0988033
																												Black	Black									Black	Black	Black	Black	Black	Black	Black	Black	Black	Black
[truncated: 34 more columns]

## Sheet: PlotDat7
Source sheet	Table S2	0.3958	0.05365	0.377967	0.0517081	0.38478	0.0525242	0.391627	0.0533409	0.398508	0.0541582	0.405423	0.0549761	0.412373	0.0557947	0.419356	0.0566139	0.375	0.0514394	0.375	0.0513481	0.375	0.0515306	0.370468	0.0508927	0.409098	0.0554236	0.407619	0.0554455	0.409729	0.0558219	0.408096	0.0555397	0.410905	0.0559465	0.413787	0.0561355	0.411763	0.0561668	0.405499	0.0551629	0.412352	0.0560245	0.409611	0.0557804	0.40214	0.0547134
Plot name	Concordia0	0.3952	0.05379	0.377937	0.0517277	0.38475	0.052544	0.391596	0.053361	0.398477	0.0541787	0.405391	0.0549969	0.41234	0.0558158	0.419323	0.0566354	0.375	0.0514394	0.375	0.0513481	0.375	0.0515306	0.377233	0.0517081	0.408801	0.0554315	0.407341	0.0554588	0.409448	0.055836	0.407811	0.0555559	0.410626	0.0559536	0.413506	0.0561474	0.411477	0.0561801	0.405218	0.0551654	0.412082	0.0560375	0.409322	0.0557885	0.401936	0.0547117
Plot Type	1	0.3972	0.05415	0.37785	0.0517457	0.384661	0.0525623	0.391506	0.0533796	0.398385	0.0541975	0.405297	0.0550161	0.412244	0.0558353	0.419225	0.0566551	0.376528	0.0516233	0.376528	0.0515317	0.376528	0.0517149	0.384031	0.0525242	0.407936	0.0553615	0.406532	0.0553991	0.408632	0.0557764	0.406984	0.0554975	0.409812	0.0558871	0.412686	0.0560856	0.410647	0.0561181	0.404399	0.0550937	0.411297	0.0559798	0.408482	0.0557206	0.401349	0.0546566
1st free col	49	0.3954	0.05385	0.377713	0.0517606	0.384522	0.0525775	0.391364	0.053395	0.398239	0.0542132	0.405149	0.055032	0.412093	0.0558514	0.419071	0.0566715	0.378057	0.0518073	0.378057	0.0517153	0.378057	0.0518992	0.390863	0.0533409	0.406541	0.0552167	0.405229	0.0552691	0.407317	0.0556457	0.405651	0.0553672	0.4085	0.05575	0.411365	0.0559528	0.409307	0.0559837	0.403078	0.0549511	0.410032	0.0558539	0.407128	0.0555796	0.400426	0.0545526
Sigma Level	2	0.3984	0.05427	0.377538	0.0517713	0.384342	0.0525884	0.391181	0.0534061	0.398053	0.0542244	0.404959	0.0550434	0.411899	0.055863	0.418874	0.0566832	0.379588	0.0519912	0.379588	0.051899	0.379588	0.0520835	0.397729	0.0541582	0.404676	0.0550035	0.403486	0.0550745	0.405559	0.0554497	0.40387	0.0551705	0.406746	0.0555481	0.409599	0.0557547	0.407516	0.0557827	0.401311	0.0547438	0.408341	0.0556654	0.405317	0.0553719	0.399241	0.0544082
Absolute Errs	FALSE	0.4012	0.05446	0.377337	0.0517769	0.384138	0.052594	0.390972	0.0534118	0.39784	0.0542302	0.404742	0.0550493	0.411678	0.055869	0.418648	0.0566893	0.381121	0.0521753	0.381121	0.0520827	0.381121	0.0522679	0.404629	0.0549761	0.402423	0.0547311	0.401382	0.0548237	0.403436	0.0551968	0.401718	0.0549161	0.404628	0.0552904	0.407467	0.0555	0.405353	0.0555238	0.399177	0.0544808	0.406299	0.0554224	0.40313	0.0551063	0.397891	0.054235
Symbol Type	1	0.399	0.05446	0.377128	0.0517769	0.383925	0.052594	0.390755	0.0534118	0.397618	0.0542302	0.404516	0.0550493	0.411448	0.055869	0.418413	0.0566893	0.382656	0.0523593	0.382656	0.0522664	0.382656	0.0524522	0.411563	0.0557947	0.399881	0.0544114	0.399008	0.0545278	0.401041	0.0548982	0.399291	0.0546151	0.402237	0.0549882	0.40506	0.0551998	0.402913	0.0552185	0.396769	0.0541737	0.403995	0.0551356	0.400661	0.0547946	0.396485	0.0540471
Inverse Plot	FALSE	0.3929	0.05347	0.376928	0.0517713	0.38372	0.0525884	0.390546	0.0534061	0.397406	0.0542244	0.404299	0.0550434	0.411226	0.055863	0.418188	0.0566832	0.384192	0.0525434	0.384192	0.0524501	0.384192	0.0526367	0.418531	0.0566139	0.39716	0.0540585	0.396467	0.0541996	0.398477	0.0545669	0.396693	0.0542807	0.399679	0.0546545	0.402485	0.0548674	0.400302	0.0548801	0.394192	0.0538357	0.401529	0.0548175	0.39802	0.0544504	0.395137	0.0538597
Color Plot	TRUE	0.4003	0.05442	0.376752	0.0517606	0.383541	0.0525775	0.390363	0.053395	0.397219	0.0542132	0.404109	0.055032	0.411033	0.0558514	0.41799	0.0566715	0.38573	0.0527275	0.38573	0.0526339	0.38573	0.0528211	IsoLine	IsoLine	0.39438	0.0536877	0.39387	0.0538535	0.395858	0.0542173	0.394039	0.0539274	0.397065	0.054304	0.399853	0.0545171	0.397634	0.0545232	0.391558	0.0534818	0.39901	0.0544821	0.395321	0.0540886	0.393955	0.053688
3D plot	FALSE	0.3967	0.05405	0.376616	0.0517457	0.383401	0.0525623	0.390221	0.0533796	0.397074	0.0541975	0.403961	0.0550161	0.410882	0.0558353	0.417836	0.0566551	0.387269	0.0529117	0.387269	0.0528177	0.387269	0.0530056			0.391662	0.0533152	0.391332	0.0535046	0.393298	0.0538649	0.391444	0.0535708	0.394509	0.053952	0.397281	0.0541643	0.395025	0.0541637	0.388983	0.0531274	0.396547	0.054144	0.392682	0.0537252	0.393037	0.0535459
Linear	FALSE	IsoLine	IsoLine	0.376529	0.0517277	0.383313	0.052544	0.390131	0.053361	0.396982	0.0541787	0.403867	0.0549969	0.410786	0.0558158	0.417739	0.0566354	0.388811	0.0530958	0.388811	0.0530016	0.388811	0.0531901			0.389125	0.0529574	0.388963	0.0531682	0.390907	0.0535248	0.389023	0.0532263	0.392123	0.053614	0.394879	0.0538245	0.39259	0.053817	0.386579	0.0527879	0.394248	0.0538179	0.390219	0.0533759	0.392456	0.0534448
Data Range	AC712:AG722			0.376499	0.0517081	0.383283	0.0525242	0.3901	0.0533409	0.39695	0.0541582	0.403835	0.0549761	0.410753	0.0557947	0.417705	0.0566139	0.390354	0.05328	0.390354	0.0531854	0.390354	0.0533747			0.38688	0.0526299	0.386867	0.052859	0.388792	0.0532122	0.38688	0.0529092	0.390012	0.0533046	0.392754	0.0535124	0.390436	0.0534985	0.384451	0.0524783	0.392213	0.0535181	0.388039	0.0530561	0.392259	0.0533931
Filled Symbols	FALSE			0.376529	0.0516886	0.383313	0.0525043	0.390131	0.0533207	0.396982	0.0541377	0.403867	0.0549553	0.410786	0.0557735	0.417739	0.0565924	0.391899	0.0534643	0.391899	0.0533693	0.391899	0.0535592			0.385024	0.052347	0.385134	0.0525904	0.387045	0.0529405	0.385109	0.0526331	0.388267	0.0530373	0.390998	0.0532417	0.388655	0.053222	0.382692	0.052212	0.390532	0.0532578	0.386238	0.0527798	0.392463	0.0533948
ConcAge	TRUE			0.376616	0.0516706	0.383401	0.052486	0.390221	0.0533021	0.397074	0.0541188	0.403961	0.0549361	0.410882	0.0557541	0.417836	0.0565727	0.393445	0.0536486	0.393445	0.0535533	0.393445	0.0537439			0.38364	0.052121	0.383842	0.0523743	0.385741	0.0527216	0.383788	0.0524102	0.386965	0.052824	0.389688	0.0530243	0.387327	0.0529996	0.38138	0.0520007	0.389278	0.0530482	0.384894	0.052559	0.39305	0.0534499
ConcSwap	FALSE			0.376752	0.0516556	0.383541	0.0524708	0.390363	0.0532867	0.397219	0.0541031	0.404109	0.0549202	0.411033	0.055738	0.41799	0.0565563	0.394993	0.0538329	0.394993	0.0537373	0.394993	0.0539285			0.382787	0.0519618	0.383046	0.0522201	0.384938	0.0525652	0.382975	0.0522503	0.386163	0.0526739	0.388881	0.0528697	0.386509	0.052841	0.380571	0.0518536	0.388505	0.0528986	0.384065	0.0524033	0.393973	0.0535539
1st Symbol-row	1			0.376928	0.051645	0.38372	0.05246	0.390546	0.0532756	0.397406	0.0540919	0.404299	0.0549089	0.411226	0.0557264	0.418188	0.0565446	0.396543	0.0540172	0.396543	0.0539213	0.396543	0.0541132			0.382502	0.0518764	0.382781	0.0521345	0.384671	0.0524781	0.382704	0.0521603	0.385895	0.0525935	0.388613	0.0527845	0.386237	0.0527532	0.380301	0.0517771	0.388248	0.0528155	0.383789	0.0523196	0.395158	0.0536983
				0.377128	0.0516394	0.383925	0.0524543	0.390755	0.0532699	0.397618	0.0540861	0.404516	0.0549029	0.411448	0.0557204	0.418413	0.0565385	0.398095	0.0542016	0.398095	0.0541053	0.398095	0.0542979			0.382799	0.0518685	0.383059	0.0521212	0.384952	0.052464	0.382989	0.0521441	0.386174	0.0525864	0.388894	0.0527726	0.386523	0.0527399	0.380582	0.0517746	0.388518	0.0528025	0.384078	0.0523115	0.396508	0.0538715
				0.377337	0.0516394	0.384138	0.0524543	0.390972	0.0532699	0.39784	0.0540861	0.404742	0.0549029	0.411678	0.0557204	0.418648	0.0565385	0.399648	0.054386	0.399648	0.0542894	0.399648	0.0544826			0.383664	0.0519385	0.383868	0.0521809	0.385768	0.0525236	0.383816	0.0522025	0.386988	0.0526529	0.389714	0.0528344	0.387353	0.0528019	0.381401	0.0518463	0.389303	0.0528602	0.384918	0.0523794	0.397914	0.0540594
				0.377538	0.051645	0.384342	0.05246	0.391181	0.0532756	0.398053	0.0540919	0.404959	0.0549089	0.411899	0.0557264	0.418874	0.0565446	0.401203	0.0545704	0.401203	0.0544735	0.401203	0.0546674			0.385059	0.0520833	0.385171	0.0523109	0.387083	0.0526543	0.385149	0.0523328	0.3883	0.05279	0.391035	0.0529672	0.388693	0.0529363	0.382722	0.0519889	0.390568	0.0529861	0.386272	0.0525204	0.399263	0.0542468
				0.377713	0.0516556	0.384522	0.0524708	0.391364	0.0532867	0.398239	0.0541031	0.405149	0.0549202	0.412093	0.055738	0.419071	0.0565563	0.40276	0.0547549	0.40276	0.0546576	0.40276	0.0548522			0.386924	0.0522965	0.386914	0.0525055	0.388841	0.0528503	0.38693	0.0525295	0.390054	0.0529919	0.392801	0.0531653	0.390484	0.0531373	0.384489	0.0521962	0.392259	0.0531746	0.388083	0.0527281	0.400444	0.0544185
				0.37785	0.0516706	0.384661	0.052486	0.391506	0.0533021	0.398385	0.0541188	0.405297	0.0549361	0.412244	0.0557541	0.419225	0.0565727	0.404319	0.0549394	0.404319	0.0548418	0.404319	0.055037			0.389177	0.0525689	0.389018	0.0527563	0.390964	0.0531032	0.389082	0.0527839	0.392172	0.0532496	0.394933	0.05342	0.392647	0.0533962	0.386623	0.0524592	0.394301	0.0534176	0.39027	0.0529937	0.401362	0.0545606
				0.377937	0.0516886	0.38475	0.0525043	0.391596	0.0533207	0.398477	0.0541377	0.405391	0.0549553	0.41234	0.0557735	0.419323	0.0565924	0.405879	0.0551239	0.405879	0.055026	0.405879	0.0552219			0.391719	0.0528886	0.391392	0.0530522	0.393359	0.0534018	0.391509	0.0530849	0.394563	0.0535518	0.39734	0.0537202	0.395087	0.0537015	0.389031	0.0527663	0.396605	0.0537044	0.392739	0.0533054	0.401943	0.0546617
				0.377967	0.0517081	0.38478	0.0525242	0.391627	0.0533409	0.398508	0.0541582	0.405423	0.0549761	0.412373	0.0557947	0.419356	0.0566139	0.407441	0.0553085	0.407441	0.0552102	0.407441	0.0554068			0.39444	0.0532415	0.393933	0.0533804	0.395923	0.0537331	0.394107	0.0534193	0.397121	0.0538855	0.399915	0.0540526	0.397698	0.0540399	0.391608	0.0531043	0.399071	0.0540225	0.39538	0.0536496	0.40214	0.0547134
				ConcTikEll	ConcTikEll	ConcTikEll	ConcTikEll	ConcTikEll	ConcTikEll	ConcTikEll	ConcTikEll	ConcTikEll	ConcTikEll	ConcTikEll	ConcTikEll	ConcTikEll	ConcTikEll	0.409005	0.0554931	0.409005	0.0553945	0.409005	0.0555918			0.39722	0.0536123	0.39653	0.0537265	0.398542	0.0540827	0.396761	0.0537726	0.399735	0.054236	0.402547	0.0544029	0.400366	0.0543968	0.394242	0.0534582	0.40159	0.0543579	0.398079	0.0540114	Cyan	Cyan
																		0.41057	0.0556777	0.41057	0.0555788	0.41057	0.0557767			0.399938	0.0539848	0.399068	0.0540754	0.401102	0.0544351	0.399356	0.0541292	0.402291	0.054588	0.405119	0.0547557	0.402975	0.0547563	0.396817	0.0538126	0.404053	0.054696	0.400718	0.0543748
																		0.412138	0.0558624	0.412138	0.0557631	0.412138	0.0559617			0.402475	0.0543426	0.401437	0.0544118	0.403493	0.0547752	0.401777	0.0544737	0.404677	0.054926	0.407521	0.0550955	0.40541	0.055103	0.399221	0.0541521	0.406352	0.0550221	0.403181	0.0547241
																		0.413707	0.0560471	0.413707	0.0559474	0.413707	0.0561468			0.40472	0.0546701	0.403533	0.054721	0.405608	0.0550878	0.40392	0.0547908	0.406788	0.0552354	0.409646	0.0554076	0.407564	0.0554215	0.401349	0.0544617	0.408387	0.0553219	0.405361	0.0550439
																		0.415277	0.0562318	0.415277	0.0561318	0.415277	0.0563318			0.406576	0.054953	0.405266	0.0549896	0.407355	0.0553595	0.405691	0.0550669	0.408533	0.0555027	0.411402	0.0556783	0.409345	0.055698	0.403108	0.054728	0.410068	0.0555822	0.407162	0.0553202
																		0.41685	0.0564166	0.41685	0.0563163	0.41685	0.0565169			0.40796	0.055179	0.406558	0.0552057	0.408659	0.0555784	0.407012	0.0552898	0.409835	0.055716	0.412712	0.0558957	0.410673	0.0559204	0.40442	0.0549393	0.411322	0.0557918	0.408506	0.055541
																		0.418424	0.0566014	0.418424	0.0565007	0.418424	0.056702			0.408813	0.0553382	0.407354	0.0553599	0.409462	0.0557348	0.407825	0.0554497	0.410637	0.0558661	0.413519	0.0560503	0.411491	0.056079	0.405229	0.0550864	0.412095	0.0559414	0.409335	0.0556967
																		0.42	0.0567862	0.42	0.0566852	0.42	0.0568872			0.409098	0.0554236	0.407619	0.0554455	0.409729	0.0558219	0.408096	0.0555397	0.410905	0.0559465	0.413787	0.0561355	0.411763	0.0561668	0.405499	0.0551629	0.412352	0.0560245	0.409611	0.0557804
																		0.42	0.0567862	0.42	0.0566852	0.42	0.0568872			Black	Black	Black	Black	Black	Black	Black	Black	Black	Black	Black	Black	Black	Black	Black	Black	Black	Black	Black	Black
																		IsoLine	IsoLine	ConcBand	ConcBand	ConcBand	ConcBand

## Sheet: PlotDat6
Source sheet	Table S2	0.3946	0.05379	0.377967	0.0517081	0.38478	0.0525242	0.391627	0.0533409	0.398508	0.0541582	0.405423	0.0549761	0.412373	0.0557947	0.375	0.0514394	0.375	0.0513481	0.375	0.0515306	0.370468	0.0508927	0.404941	0.0550997	0.407052	0.0555616	0.404295	0.0547947	0.408581	0.0551267	0.401078	0.0545626	0.401612	0.0545578	0.404365	0.0547776	0.406214	0.0554356	0.410057	0.0556091	0.402462	0.0543431	0.404232	0.0548664	0.404595	0.0550611	0.399215	0.0543415
Plot name	Concordia0	0.398	0.05446	0.377937	0.0517277	0.38475	0.052544	0.391596	0.053361	0.398477	0.0541787	0.405391	0.0549969	0.41234	0.0558158	0.375	0.0514394	0.375	0.0513481	0.375	0.0515306	0.377233	0.0517081	0.404793	0.0551409	0.40692	0.0556099	0.404151	0.0548497	0.408452	0.0551704	0.400951	0.0546076	0.401473	0.0546034	0.404229	0.0548302	0.406094	0.0554791	0.409918	0.0556634	0.402314	0.0544052	0.404106	0.0549129	0.404469	0.055106	0.399076	0.0543961
Plot Type	1	0.3944	0.05361	0.37785	0.0517457	0.384661	0.0525623	0.391506	0.0533796	0.398385	0.0541975	0.405297	0.0550161	0.412244	0.0558353	0.376446	0.0516135	0.376446	0.0515219	0.376446	0.0517051	0.384031	0.0525242	0.404366	0.0551452	0.406546	0.055627	0.403742	0.0548709	0.408081	0.055183	0.400588	0.0546221	0.401076	0.0546154	0.403842	0.0548509	0.40575	0.0554937	0.409523	0.0556852	0.401893	0.0544333	0.403744	0.0549293	0.40411	0.0551208	0.398678	0.0544179
1st free col	79	0.3996	0.05403	0.377713	0.0517606	0.384522	0.0525775	0.391364	0.053395	0.398239	0.0542132	0.405149	0.055032	0.412093	0.0558514	0.377894	0.0517876	0.377894	0.0516957	0.377894	0.0518795	0.390863	0.0533409	0.403673	0.0551126	0.405938	0.0556122	0.403078	0.0548576	0.407478	0.0551641	0.399999	0.0546057	0.400431	0.0545934	0.403213	0.0548392	0.405192	0.055479	0.408881	0.0556738	0.401211	0.0544267	0.403158	0.0549151	0.403526	0.0551051	0.398032	0.0544061
Sigma Level	2	0.3923	0.05349	0.377538	0.0517713	0.384342	0.0525884	0.391181	0.0534061	0.398053	0.0542244	0.404959	0.0550434	0.411899	0.055863	0.379343	0.0519618	0.379343	0.0518695	0.379343	0.052054	0.397729	0.0541582	0.402733	0.0550439	0.405114	0.0555659	0.402177	0.0548104	0.406661	0.0551143	0.3992	0.0545588	0.399556	0.0545381	0.40236	0.0547952	0.404435	0.0554354	0.408011	0.0556296	0.400285	0.0543855	0.402363	0.0548708	0.402735	0.0550591	0.397156	0.0543612
Absolute Errs	FALSE	0.392	0.05337	0.377337	0.0517769	0.384138	0.052594	0.390972	0.0534118	0.39784	0.0542302	0.404742	0.0550493	0.411678	0.055869	0.380794	0.0521359	0.380794	0.0520434	0.380794	0.0522285	0.404629	0.0549761	0.40157	0.054941	0.404096	0.0554895	0.401063	0.0547304	0.405651	0.0550349	0.398213	0.0544828	0.398476	0.0544508	0.401307	0.0547203	0.4035	0.0553642	0.406936	0.0555538	0.399142	0.0543109	0.401381	0.0547976	0.401757	0.0549843	0.396075	0.0542843
Symbol Type	1	0.395	0.05366	0.377128	0.0517769	0.383925	0.052594	0.390755	0.0534118	0.397618	0.0542302	0.404516	0.0550493	0.411448	0.055869	0.382246	0.0523102	0.382246	0.0522173	0.382246	0.052403	0.411563	0.0557947	0.400218	0.0548067	0.402911	0.0553851	0.399769	0.0546198	0.404476	0.0549282	0.397064	0.0543798	0.397218	0.0543342	0.400081	0.0546165	0.402412	0.0552671	0.405685	0.0554484	0.397812	0.054205	0.400239	0.0546975	0.400619	0.0548827	0.394816	0.0541776
Inverse Plot	FALSE	0.3979	0.05442	0.376928	0.0517713	0.38372	0.0525884	0.390546	0.0534061	0.397406	0.0542244	0.404299	0.0550434	0.411226	0.055863	0.383699	0.0524844	0.383699	0.0523912	0.383699	0.0525776	IsoLine	IsoLine	0.398712	0.0546446	0.401593	0.0552553	0.398327	0.0544817	0.403168	0.0547969	0.395786	0.0542524	0.395818	0.0541912	0.398717	0.0544866	0.401201	0.055147	0.404293	0.0553163	0.396331	0.0540705	0.398967	0.0545731	0.399352	0.0547569	0.393416	0.054044
Color Plot	TRUE	0.4005	0.05447	0.376752	0.0517606	0.383541	0.0525775	0.390363	0.053395	0.397219	0.0542132	0.404109	0.055032	0.411033	0.0558514	0.385155	0.0526587	0.385155	0.0525652	0.385155	0.0527522			0.397095	0.0544593	0.400177	0.0551039	0.396779	0.0543199	0.401763	0.0546447	0.394412	0.0541043	0.394314	0.0540258	0.397251	0.0543341	0.3999	0.055007	0.402797	0.0551611	0.394741	0.0539111	0.3976	0.0544279	0.397992	0.0546105	0.391911	0.053887
3D plot	FALSE	0.3923	0.05316	0.376616	0.0517457	0.383401	0.0525623	0.390221	0.0533796	0.397074	0.0541975	0.403961	0.0550161	0.410882	0.0558353	0.386611	0.052833	0.386611	0.0527392	0.386611	0.0529268			0.395409	0.0542557	0.398701	0.0549349	0.395166	0.0541386	0.400298	0.0544757	0.392981	0.0539394	0.392747	0.0538425	0.395724	0.0541632	0.398544	0.0548511	0.401239	0.0549871	0.393084	0.0537313	0.396176	0.0542658	0.396574	0.0544475	0.390343	0.0537111
Linear	FALSE	0.3955	0.05381	0.376529	0.0517277	0.383313	0.052544	0.390131	0.053361	0.396982	0.0541787	0.403867	0.0549969	0.410786	0.0558158	0.38807	0.0530073	0.38807	0.0529132	0.38807	0.0531014			0.393701	0.0540394	0.397206	0.054753	0.393531	0.0539429	0.398815	0.0542946	0.391531	0.0537623	0.39116	0.0536463	0.394178	0.0539786	0.397171	0.0546833	0.39966	0.054799	0.391406	0.0535359	0.394734	0.0540914	0.395138	0.0542722	0.388755	0.0535209
Data Range	AC535:AG560	0.3959	0.054	0.376499	0.0517081	0.383283	0.0525242	0.3901	0.0533409	0.39695	0.0541582	0.403835	0.0549761	0.410753	0.0557947	0.38953	0.0531817	0.38953	0.0530872	0.38953	0.0532761			0.392017	0.0538163	0.395733	0.0545631	0.391921	0.0537382	0.397353	0.0541062	0.390102	0.0535777	0.389596	0.0534426	0.392653	0.0537854	0.395818	0.0545084	0.398105	0.0546019	0.389752	0.0533303	0.393313	0.0539092	0.393723	0.0540896	0.38719	0.0533217
Filled Symbols	FALSE	0.3896	0.05319	0.376529	0.0516886	0.383313	0.0525043	0.390131	0.0533207	0.396982	0.0541377	0.403867	0.0549553	0.410786	0.0557735	0.390991	0.0533561	0.390991	0.0532613	0.390991	0.0534508			0.390404	0.0535924	0.394321	0.0543704	0.390378	0.05353	0.395952	0.0539158	0.388733	0.0533907	0.388097	0.0532369	0.391193	0.0535887	0.394521	0.0543311	0.396615	0.0544012	0.388167	0.05312	0.391951	0.0537244	0.392367	0.0539045	0.385691	0.0531189
ConcAge	TRUE	0.3947	0.05319	0.376616	0.0516706	0.383401	0.052486	0.390221	0.0533021	0.397074	0.0541188	0.403961	0.0549361	0.410882	0.0557541	0.392454	0.0535305	0.392454	0.0534354	0.392454	0.0536255			0.388906	0.053374	0.39301	0.0541801	0.388945	0.0533239	0.394651	0.0537285	0.387462	0.0532065	0.386704	0.0530349	0.389837	0.0533939	0.393317	0.0541562	0.39523	0.0542024	0.386696	0.0529108	0.390687	0.0535418	0.391107	0.0537219	0.384298	0.052918
ConcSwap	FALSE	0.3997	0.05394	0.376752	0.0516556	0.383541	0.0524708	0.390363	0.0532867	0.397219	0.0541031	0.404109	0.0549202	0.411033	0.055738	0.393918	0.0537049	0.393918	0.0536095	0.393918	0.0538003			0.387563	0.0531669	0.391835	0.0539974	0.38766	0.0531257	0.393485	0.0535494	0.386322	0.0530299	0.385456	0.052842	0.388621	0.0532064	0.392238	0.0539885	0.39399	0.0540108	0.385377	0.0527084	0.389553	0.0533666	0.389978	0.053547	0.38305	0.0527246
1st Symbol-row	1	0.3944	0.0539	0.376928	0.051645	0.38372	0.05246	0.390546	0.0532756	0.397406	0.0540919	0.404299	0.0549089	0.411226	0.0557264	0.395384	0.0538794	0.395384	0.0537837	0.395384	0.0539751			0.386411	0.0529768	0.390828	0.0538274	0.38656	0.0529406	0.392486	0.0533834	0.385346	0.0528659	0.384387	0.0526634	0.387579	0.0530313	0.391313	0.0538326	0.392927	0.0538319	0.384247	0.0525183	0.388582	0.0532035	0.389011	0.0533845	0.381981	0.0525439
		0.3927	0.05364	0.377128	0.0516394	0.383925	0.0524543	0.390755	0.0532699	0.397618	0.0540861	0.404516	0.0549029	0.411448	0.0557204	0.396852	0.0540539	0.396852	0.0539579	0.396852	0.0541499			0.385484	0.0528089	0.390017	0.0536746	0.385673	0.0527738	0.39168	0.0532351	0.384559	0.052719	0.383525	0.0525042	0.38674	0.0528733	0.390568	0.0536927	0.392071	0.0536703	0.383337	0.0523457	0.387799	0.0530569	0.388232	0.0532387	0.381119	0.0523807
		0.3983	0.05418	0.377337	0.0516394	0.384138	0.0524543	0.390972	0.0532699	0.39784	0.0540861	0.404742	0.0549029	0.411678	0.0557204	0.398321	0.0542284	0.398321	0.0541321	0.398321	0.0543248			0.384804	0.0526678	0.389424	0.0535432	0.385025	0.0526299	0.391091	0.0531084	0.383983	0.0525931	0.382894	0.0523686	0.386126	0.0527368	0.390023	0.0535726	0.391444	0.0535305	0.382671	0.0521953	0.387227	0.0529309	0.387662	0.0531137	0.380489	0.0522397
		0.3999	0.05425	0.377538	0.051645	0.384342	0.05246	0.391181	0.0532756	0.398053	0.0540919	0.404959	0.0549089	0.411899	0.0557264	0.399792	0.054403	0.399792	0.0543063	0.399792	0.0544997			0.384392	0.0525572	0.389064	0.0534369	0.384632	0.0525126	0.390734	0.0530069	0.383635	0.0524916	0.382512	0.0522603	0.385755	0.0526255	0.389692	0.0534756	0.391065	0.0534163	0.382268	0.0520713	0.38688	0.0528289	0.387316	0.0530128	0.380107	0.0521246
		0.392	0.0535	0.377713	0.0516556	0.384522	0.0524708	0.391364	0.0532867	0.398239	0.0541031	0.405149	0.0549202	0.412093	0.055738	0.401264	0.0545776	0.401264	0.0544806	0.401264	0.0546746			0.384259	0.0524803	0.388948	0.0533584	0.384505	0.0524253	0.390619	0.0529333	0.383522	0.0524174	0.382388	0.0521822	0.385635	0.0525424	0.389586	0.0534044	0.390943	0.0533309	0.382138	0.0519769	0.386768	0.0527536	0.387205	0.0529389	0.379985	0.0520385
		0.3989	0.05445	0.37785	0.0516706	0.384661	0.052486	0.391506	0.0533021	0.398385	0.0541188	0.405297	0.0549361	0.412244	0.0557541	0.402738	0.0547522	0.402738	0.0546549	0.402738	0.0548495			0.384407	0.0524391	0.38908	0.0533101	0.384649	0.0523703	0.390748	0.0528896	0.383649	0.0523724	0.382527	0.0521366	0.385771	0.0524898	0.389706	0.0533609	0.391082	0.0532766	0.382286	0.0519148	0.386894	0.0527071	0.387331	0.052894	0.380124	0.0519839
		0.3904	0.05335	0.377937	0.0516886	0.38475	0.0525043	0.391596	0.0533207	0.398477	0.0541377	0.405391	0.0549553	0.41234	0.0557735	0.404213	0.0549269	0.404213	0.0548292	0.404213	0.0550245			0.384834	0.0524348	0.389454	0.053293	0.385058	0.0523491	0.391119	0.052877	0.384012	0.0523579	0.382924	0.0521246	0.386158	0.0524691	0.39005	0.0533463	0.391477	0.0532548	0.382707	0.0518867	0.387256	0.0526907	0.38769	0.0528792	0.380522	0.0519621
		0.3929	0.0533	0.377967	0.0517081	0.38478	0.0525242	0.391627	0.0533409	0.398508	0.0541582	0.405423	0.0549761	0.412373	0.0557947	0.40569	0.0551015	0.40569	0.0550036	0.40569	0.0551995			0.385527	0.0524674	0.390062	0.0533078	0.385722	0.0523624	0.391722	0.0528959	0.384601	0.0523743	0.383569	0.0521466	0.386787	0.0524808	0.390608	0.053361	0.392119	0.0532662	0.383389	0.0518933	0.387842	0.0527049	0.388274	0.0528949	0.381168	0.0519739
		0.3894	0.0532	ConcTikEll	ConcTikEll	ConcTikEll	ConcTikEll	ConcTikEll	ConcTikEll	ConcTikEll	ConcTikEll	ConcTikEll	ConcTikEll	ConcTikEll	ConcTikEll	0.407168	0.0552762	0.407168	0.055178	0.407168	0.0553745			0.386467	0.0525361	0.390886	0.0533541	0.386623	0.0524096	0.392539	0.0529457	0.3854	0.0524212	0.384444	0.0522019	0.38764	0.0525248	0.391365	0.0534046	0.392989	0.0533104	0.384315	0.0519345	0.388637	0.0527492	0.389065	0.0529409	0.382044	0.0520188
		0.3926	0.05358													0.408648	0.055451	0.408648	0.0553524	0.408648	0.0555495			0.38763	0.052639	0.391904	0.0534305	0.387737	0.0524896	0.393549	0.0530251	0.386387	0.0524972	0.385524	0.0522892	0.388693	0.0525997	0.3923	0.0534758	0.394064	0.0533862	0.385458	0.0520091	0.389619	0.0528224	0.390043	0.0530157	0.383125	0.0520957
		0.3955	0.0539													0.410129	0.0556257	0.410129	0.0555269	0.410129	0.0557246			0.388982	0.0527733	0.393089	0.0535349	0.389031	0.0526002	0.394724	0.0531318	0.387536	0.0526002	0.386782	0.0524058	0.389919	0.0527035	0.393388	0.0535729	0.395315	0.0534916	0.386788	0.052115	0.390761	0.0529225	0.391181	0.0531173	0.384384	0.0522024
		IsoLine	IsoLine													0.411612	0.0558005	0.411612	0.0557013	0.411612	0.0558997			0.390488	0.0529354	0.394407	0.0536647	0.390473	0.0527383	0.396032	0.0532631	0.388814	0.0527276	0.388182	0.0525488	0.391283	0.0528334	0.394599	0.053693	0.396707	0.0536237	0.388269	0.0522495	0.392033	0.0530469	0.392448	0.0532431	0.385784	0.052336
																0.413097	0.0559754	0.413097	0.0558758	0.413097	0.0560749			0.392105	0.0531207	0.395823	0.0538161	0.392021	0.0529001	0.397437	0.0534153	0.390188	0.0528757	0.389686	0.0527142	0.392749	0.0529859	0.3959	0.053833	0.398203	0.0537789	0.389859	0.0524089	0.3934	0.0531921	0.393808	0.0533895	0.387289	0.052493
																0.414583	0.0561502	0.414583	0.0560504	0.414583	0.0562501			0.393791	0.0533243	0.397299	0.0539851	0.393634	0.0530814	0.398902	0.0535843	0.391619	0.0530406	0.391253	0.0528975	0.394276	0.0531568	0.397256	0.0539889	0.399761	0.0539529	0.391516	0.0525887	0.394824	0.0533542	0.395226	0.0535525	0.388857	0.0526689
																0.416071	0.0563251	0.416071	0.0562249	0.416071	0.0564253			0.395499	0.0535406	0.398794	0.054167	0.395269	0.0532771	0.400385	0.0537654	0.393069	0.0532177	0.39284	0.0530937	0.395822	0.0533414	0.398629	0.0541567	0.40134	0.054141	0.393194	0.0527841	0.396266	0.0535286	0.396662	0.0537278	0.390445	0.0528591
																0.41756	0.0565	0.41756	0.0563995	0.416706	0.0565			0.397183	0.0537637	0.400267	0.0543569	0.396879	0.0534818	0.401847	0.0539538	0.394498	0.0534023	0.394404	0.0532974	0.397347	0.0535346	0.399982	0.0543316	0.402895	0.0543381	0.394848	0.0529897	0.397687	0.0537108	0.398077	0.0539104	0.39201	0.0530583
																0.41756	0.0565	0.418418	0.0565	ConcBand	ConcBand			0.398796	0.0539876	0.401679	0.0545496	0.398422	0.05369	0.403248	0.0541442	0.395867	0.0535893	0.395903	0.0535031	0.398807	0.0537313	0.401279	0.0545089	0.404385	0.0545388	0.396433	0.0532	0.399049	0.0538956	0.399433	0.0540955	0.393509	0.0532611
																IsoLine	IsoLine	ConcBand	ConcBand					0.400294	0.054206	0.40299	0.0547399	0.399855	0.0538961	0.404549	0.0543315	0.397138	0.0537735	0.397296	0.0537051	0.400163	0.0539261	0.402483	0.0546838	0.40577	0.0547376	0.397904	0.0534092	0.400313	0.0540782	0.400693	0.0542781	0.394902	0.053462
																								0.401637	0.0544131	0.404165	0.0549226	0.40114	0.0540943	0.405715	0.0545106	0.398278	0.0539501	0.398544	0.053898	0.401379	0.0541136	0.403562	0.0548515	0.40701	0.0549292	0.399223	0.0536116	0.401447	0.0542534	0.401822	0.054453	0.39615	0.0536554
																								0.402789	0.0546032	0.405172	0.0550926	0.40224	0.0542794	0.406714	0.0546766	0.399254	0.0541141	0.399613	0.0540766	0.402421	0.0542887	0.404487	0.0550074	0.408073	0.0551081	0.400353	0.0538017	0.402418	0.0544165	0.402789	0.0546155	0.397219	0.0538361
																								0.403716	0.0547711	0.405983	0.0552454	0.403127	0.0544462	0.40752	0.0548249	0.400041	0.054261	0.400475	0.0542358	0.40326	0.0544467	0.405232	0.0551473	0.408929	0.0552697	0.401263	0.0539743	0.403201	0.0545631	0.403568	0.0547613	0.398081	0.0539993
																								0.404396	0.0549122	0.406576	0.0553768	0.403775	0.0545901	0.408109	0.0549516	0.400617	0.0543869	0.401106	0.0543714	0.403874	0.0545832	0.405777	0.0552674	0.409556	0.0554095	0.401929	0.0541247	0.403773	0.0546891	0.404138	0.0548863	0.398711	0.0541403
																								0.404808	0.0550228	0.406936	0.0554831	0.404168	0.0547074	0.408466	0.0550531	0.400965	0.0544884	0.401488	0.0544797	0.404245	0.0546945	0.406108	0.0553644	0.409935	0.0555237	0.402332	0.0542487	0.40412	0.0547911	0.404484	0.0549872	0.399093	0.0542554
																								0.404941	0.0550997	0.407052	0.0555616	0.404295	0.0547947	0.408581	0.0551267	0.401078	0.0545626	0.401612	0.0545578	0.404365	0.0547776	0.406214	0.0554356	0.410057	0.0556091	0.402462	0.0543431	0.404232	0.0548664	0.404595	0.0550611	0.399215	0.0543415
																								Black	Black	Black	Black	Black	Black	Black	Black	Black	Black	Black	Black	Black	Black	Black	Black	Black	Black	Black	Black	Black	Black	Black	Black	Black	Black
[truncated: 28 more columns]

## Sheet: PlotDat9
Source sheet	Table- U-Pb	0.2467	0.03659	0.206429	0.03	0.217708	0.0315113	0.273336	0.0366834	0.269959	0.038148	0.2639	0.0374012	0.265839	0.0375936	0.269351	0.0379236	0.272834	0.038408	0.411322	0.0402366	0.317841	0.0435721	0.295644	0.0399707	0.256194	0.0367121	0.329187	0.0418685	0.275292	0.0376145	0.281639	0.0378541	0.279231	0.0376164	0.326998	0.0413437	0.47819	0.0597765	0.476865	0.0615731	0.491021	0.0643039	0.480586	0.064106	0.48051	0.0636128	0.269683	0.0378057
Plot name	Concordia0	0.2645	0.03765	0.217708	0.0315113	0.24193	0.0347165	0.272257	0.0368487	0.269728	0.0382322	0.263674	0.0374937	0.265623	0.0376787	0.269075	0.038032	0.272603	0.0385035	0.4107	0.0404156	0.316652	0.0437711	0.294612	0.0401657	0.255577	0.0368526	0.32813	0.0420374	0.27461	0.0377657	0.280919	0.0380136	0.27847	0.0378054	0.325641	0.0415426	0.477446	0.0600222	0.476279	0.0618513	0.490709	0.0643777	0.480292	0.0641696	0.480194	0.0636933	0.269489	0.0378678
Plot Type	1	0.2585	0.03701	0.230177	0.0331679	0.266635	0.0379317	0.269107	0.0369931	0.269074	0.0382692	0.263028	0.037547	0.265008	0.0377233	0.268291	0.0380892	0.271942	0.0385623	0.408894	0.0405424	0.313182	0.0439441	0.291603	0.0403335	0.25378	0.0369719	0.325044	0.0421837	0.272624	0.0378937	0.278821	0.0381485	0.276253	0.0379633	0.321679	0.0417162	0.475254	0.0602416	0.474562	0.0620872	0.489821	0.0643812	0.479457	0.0641643	0.479295	0.0637032	0.268939	0.0378871
1st free col	107	0.2607	0.03718	0.242774	0.0348272	0.291832	0.0411569	0.264142	0.0371047	0.268049	0.038256	0.262015	0.0375568	0.264044	0.037724	0.267062	0.0380905	0.270905	0.0385796	0.406052	0.0406066	0.307712	0.0440771	0.286859	0.0404605	0.250947	0.0370602	0.320181	0.0422958	0.269493	0.0379882	0.275513	0.0382478	0.27276	0.0380771	0.315435	0.0418504	0.47171	0.060425	0.471789	0.0622702	0.48843	0.0643142	0.478146	0.0640906	0.477886	0.0636415	0.268079	0.0378621
Sigma Level	2	0.2628	0.0374	0.255501	0.0364892	0.317529	0.0443921	0.257763	0.0371747	0.266737	0.0381938	0.260718	0.0375223	0.262809	0.0376805	0.265488	0.0380359	0.269576	0.0385539	0.402404	0.0406031	0.300686	0.0441593	0.280766	0.0405364	0.247308	0.0371104	0.313935	0.0423644	0.265472	0.0380415	0.271265	0.0383036	0.268274	0.0381377	0.307414	0.0419343	0.466967	0.0605646	0.468081	0.0623926	0.486646	0.064182	0.476467	0.0639545	0.476081	0.0635132	0.266977	0.0377948
Absolute Errs	FALSE	0.2673	0.03805	0.268357	0.0381538	0.343738	0.0476374	0.250489	0.0371973	0.265243	0.0380875	0.259241	0.0374463	0.261403	0.0375966	0.263696	0.0379298	0.268063	0.0384874	0.398245	0.040532	0.292673	0.044184	0.273817	0.0405551	0.243158	0.0371184	0.30681	0.042384	0.260885	0.0380494	0.26642	0.0383112	0.263158	0.0381402	0.298265	0.0419612	0.461234	0.0606541	0.4636	0.0624488	0.484616	0.0639953	0.474557	0.063767	0.474027	0.0633288	0.265723	0.0376906
Symbol Type	1	0.3961	0.03977	0.281345	0.0398211	0.370468	0.0508927	0.242907	0.0371707	0.26369	0.0379457	0.257704	0.037335	0.25994	0.0374788	0.261831	0.0377808	0.266487	0.0383855	0.393912	0.0403992	0.284321	0.0441492	0.266575	0.0405151	0.238834	0.0370836	0.299385	0.0423532	0.256106	0.0380111	0.261371	0.0382702	0.257827	0.0380843	0.28873	0.0419289	0.45476	0.0606897	0.458543	0.0624364	0.482504	0.0637694	0.472568	0.0635432	0.471889	0.0631031	0.264419	0.0375581
Inverse Plot	FALSE	0.2885	0.04345	0.294466	0.0414911	0.397729	0.0541582	0.235633	0.0370971	0.262202	0.03778	0.256231	0.0371973	0.258539	0.0373369	0.260045	0.0376009	0.264978	0.0382564	0.389757	0.0402154	0.276308	0.0440579	0.259627	0.0404195	0.234685	0.0370089	0.292261	0.0422742	0.25152	0.0379298	0.256527	0.0381838	0.252712	0.0379746	0.279582	0.0418399	0.44783	0.0606698	0.45313	0.062356	0.48048	0.0635224	0.470663	0.0633014	0.469842	0.0628545	0.26317	0.0374079
Color Plot	TRUE	0.2702	0.03983	0.307722	0.0431638	0.425533	0.0574338	0.229255	0.0369824	0.2609	0.0376037	0.254943	0.0370445	0.257312	0.0371822	0.258482	0.0374048	0.263657	0.0381106	0.386115	0.0399956	0.269283	0.0439172	0.253535	0.0402762	0.231047	0.0369002	0.286015	0.0421536	0.2475	0.037812	0.25228	0.038059	0.248229	0.0378199	0.271561	0.0417015	0.440745	0.0605953	0.447597	0.0622111	0.47871	0.0632744	0.468996	0.0630611	0.46805	0.0626032	0.262077	0.0372521
3D plot	FALSE	0.241	0.03659	0.321113	0.0448391	0.45389	0.0607196	0.224291	0.0368359	0.25989	0.0374312	0.253942	0.0368888	0.256361	0.0370274	0.257269	0.0372082	0.262631	0.0379599	0.383283	0.0397575	0.263815	0.0437387	0.248793	0.0400968	0.228216	0.0367664	0.281153	0.0420011	0.244371	0.0376674	0.248974	0.0379059	0.244739	0.0376329	0.265318	0.0415249	0.433815	0.0604694	0.442187	0.0620081	0.477335	0.0630455	0.467702	0.0628418	0.466659	0.0623693	0.261229	0.0371035
Linear	FALSE	0.3031	0.04176	0.334642	0.0465172	0.482812	0.0640155	0.221142	0.0366694	0.259253	0.0372765	0.253311	0.036743	0.255761	0.0368849	0.256504	0.0370272	0.261983	0.0378165	0.381488	0.0395203	0.260346	0.0435369	0.245785	0.0398957	0.226421	0.0366182	0.278069	0.0418291	0.242387	0.0375076	0.246878	0.037737	0.242526	0.0374286	0.261358	0.0413244	0.427344	0.0602976	0.437136	0.0617557	0.476468	0.0628543	0.466886	0.0626612	0.465782	0.062172	0.260695	0.0369741
Data Range	AC501:AG549	0.2585	0.03748	0.348309	0.0481979	0.512308	0.0673218	0.220064	0.0364966	0.259041	0.037152	0.2531	0.0366188	0.255561	0.0367664	0.256249	0.0368764	0.261766	0.037692	0.380878	0.0393034	0.259159	0.0433279	0.244756	0.0396893	0.225806	0.0364679	0.277013	0.0416515	0.241708	0.0373455	0.246161	0.0375659	0.241769	0.0372236	0.260002	0.0411163	0.421614	0.0600875	0.432664	0.0614651	0.476179	0.0627161	0.466614	0.062534	0.46549	0.0620272	0.260517	0.0368743
Filled Symbols	FALSE	0.2639	0.03771	0.362116	0.0498813	0.542391	0.0706383	0.221143	0.0363313	0.259272	0.0370678	0.253326	0.0365263	0.255777	0.0366813	0.256525	0.036768	0.261997	0.0375965	0.3815	0.0391244	0.260348	0.0431289	0.245788	0.0394943	0.226423	0.0363274	0.27807	0.0414826	0.24239	0.0371943	0.246881	0.0374064	0.24253	0.0370346	0.261359	0.0409174	0.416875	0.0598482	0.428968	0.0611489	0.476491	0.0626423	0.466908	0.0624704	0.465806	0.0619467	0.260711	0.0368122
ConcAge	FALSE	0.2605	0.03742	0.376064	0.0515675	0.573073	0.0739651	0.224293	0.0361869	0.259926	0.0370308	0.253972	0.036473	0.256392	0.0366367	0.257309	0.0367108	0.262658	0.0375377	0.383306	0.0389976	0.263818	0.0429559	0.248797	0.0393265	0.22822	0.0362081	0.281156	0.0413363	0.244376	0.0370663	0.248979	0.0372715	0.244747	0.0368767	0.265321	0.0407438	0.413335	0.0595902	0.426208	0.0608209	0.477379	0.0626388	0.467743	0.0624757	0.466705	0.0619368	0.261261	0.0367929
ConcSwap	FALSE	0.2935	0.04123	0.390155	0.0532563	0.604365	0.0773023	0.229258	0.0360753	0.260951	0.037044	0.254985	0.0364632	0.257356	0.036636	0.258538	0.0367095	0.263695	0.0375204	0.386148	0.0389334	0.269288	0.0428229	0.253541	0.0391995	0.231053	0.0361198	0.286019	0.0412242	0.247507	0.0369718	0.252287	0.0371722	0.24824	0.0367629	0.271565	0.0406096	0.411148	0.0593248	0.424506	0.0604955	0.47877	0.0627058	0.469054	0.0625494	0.468114	0.0619985	0.262121	0.0368179
1st Symbol-row	1	0.4443	0.05942	0.404391	0.0549479	0.636279	0.0806498	0.235637	0.0360053	0.262263	0.0371062	0.256282	0.0364977	0.258591	0.0366795	0.260112	0.0367641	0.265024	0.0375461	0.389796	0.0389369	0.276314	0.0427407	0.259634	0.0391236	0.234692	0.0360696	0.292265	0.0411556	0.251528	0.0369185	0.256535	0.0371164	0.252726	0.0367023	0.279586	0.0405257	0.41041	0.0590635	0.423935	0.0601869	0.480554	0.062838	0.470733	0.0626855	0.469919	0.0621268	0.263223	0.0368852
		0.4504	0.06088	0.418772	0.0566422	IsoLine	IsoLine	0.242911	0.0359827	0.263757	0.0372125	0.257759	0.0365737	0.259997	0.0367634	0.261904	0.0368702	0.266537	0.0376126	0.393955	0.039008	0.284327	0.042716	0.266583	0.0391049	0.238842	0.0360616	0.29939	0.041136	0.256115	0.0369106	0.26138	0.0371088	0.257842	0.0366998	0.288735	0.0404988	0.411154	0.0588178	0.424521	0.0599087	0.482584	0.0630247	0.472643	0.062873	0.471973	0.0623112	0.264477	0.0369894
		0.4836	0.06351	0.4333	0.0583392			0.250493	0.0360093	0.26531	0.0373543	0.259296	0.036685	0.26146	0.0368812	0.263769	0.0370192	0.268113	0.0377145	0.398288	0.0391408	0.292679	0.0427508	0.273825	0.0391449	0.243166	0.0360964	0.306815	0.0411668	0.260894	0.0369489	0.266429	0.0371498	0.263173	0.0367557	0.29827	0.0405311	0.413346	0.0585984	0.426238	0.0596728	0.484696	0.0632506	0.474632	0.0630968	0.474111	0.0625369	0.265781	0.0371219
		0.4736	0.06332	0.447978	0.0600389			0.257767	0.0360829	0.266798	0.03752	0.260769	0.0368227	0.262861	0.0370231	0.265555	0.0371991	0.269622	0.0378436	0.402443	0.0393246	0.300692	0.0428421	0.280773	0.0392405	0.247315	0.0361711	0.313939	0.0412458	0.26548	0.0370302	0.271273	0.0372362	0.268288	0.0368654	0.307418	0.0406201	0.41689	0.058415	0.429011	0.0594898	0.48672	0.0634976	0.476537	0.0633386	0.476158	0.0627855	0.26703	0.0372721
		0.473	0.06282	0.462805	0.0617414			0.264145	0.0361976	0.2681	0.0376963	0.262057	0.0369755	0.264088	0.0371778	0.267118	0.0373952	0.270943	0.0379894	0.406085	0.0395444	0.307717	0.0429828	0.286865	0.0393838	0.250953	0.0362798	0.320185	0.0413664	0.2695	0.037148	0.27552	0.037361	0.272771	0.0370201	0.315439	0.0407585	0.421633	0.0582754	0.432719	0.0593674	0.48849	0.0637456	0.478204	0.0635789	0.47795	0.0630368	0.268123	0.0374279
		0.2651	0.03734	0.477784	0.0634465			0.269109	0.0363441	0.26911	0.0378688	0.263058	0.0371312	0.265039	0.0373326	0.268331	0.0375918	0.271969	0.0381401	0.408917	0.0397825	0.313185	0.0431613	0.291607	0.0395632	0.253784	0.0364136	0.325047	0.0415189	0.272629	0.0372926	0.278826	0.0375141	0.276261	0.0372071	0.321682	0.0409351	0.427366	0.0581859	0.4372	0.0593112	0.489865	0.0639745	0.479498	0.0637982	0.479341	0.0632707	0.268971	0.0375765
		0.2662	0.03799	0.492917	0.0651545			0.272258	0.0365106	0.269747	0.0380235	0.263689	0.037277	0.265639	0.0374751	0.269096	0.0377728	0.272617	0.0382835	0.410712	0.0400197	0.316654	0.0433631	0.294615	0.0397643	0.255579	0.0365618	0.328131	0.0416909	0.274613	0.0374524	0.280922	0.037683	0.278474	0.0374114	0.325642	0.0411356	0.43384	0.0581503	0.442257	0.0593236	0.490732	0.0641657	0.480314	0.0639788	0.480218	0.063468	0.269505	0.0377059
		0.256	0.03795	0.508205	0.0668651			0.273336	0.0366834	0.269959	0.038148	0.2639	0.0374012	0.265839	0.0375936	0.269351	0.0379236	0.272834	0.038408	0.411322	0.0402366	0.317841	0.0435721	0.295644	0.0399707	0.256194	0.0367121	0.329187	0.0418685	0.275292	0.0376145	0.281639	0.0378541	0.279231	0.0376164	0.326998	0.0413437	0.44077	0.0581702	0.44767	0.059404	0.491021	0.0643039	0.480586	0.064106	0.48051	0.0636128	0.269683	0.0378057
		0.4303	0.05682	0.523649	0.0685786			Black	Black	Black	Black	Black	Black	Black	Black	Black	Black	Black	Black	Black	Black	Black	Black	Black	Black	Black	Black	Black	Black	Black	Black	Black	Black	Black	Black	Black	Black	0.447855	0.0582447	0.453203	0.0595489	Black	Black	Black	Black	Black	Black	Black	Black
		0.4167	0.05655	0.539252	0.0702947																																	0.454785	0.0583706	0.458613	0.0597519
		0.4224	0.05749	0.555014	0.0720136																																	0.461256	0.0585424	0.463664	0.0600043
		0.7783	0.08243	0.570938	0.0737353																																	0.466986	0.0587525	0.468136	0.0602949
		0.5405	0.06745	0.587024	0.0754598																																	0.471725	0.0589918	0.471832	0.0606111
		0.5736	0.0738	0.603276	0.077187																																	0.475265	0.0592498	0.474592	0.0609391
		0.4645	0.06179	0.619693	0.078917																																	0.477452	0.0595152	0.476294	0.0612645
		0.4405	0.05896	0.636279	0.0806498																																	0.47819	0.0597765	0.476865	0.0615731
		0.4327	0.05838	0.65	0.0820709																																	Black	Black	Black	Black
		0.3664	0.04823	IsoLine	IsoLine
		0.3634	0.04824
		0.3484	0.04826
		0.2614	0.03718
		0.2623	0.03745
		0.2604	0.03767
		0.581	0.075
		0.5812	0.07505
		0.5712	0.07376
		0.3923	0.05358
		1.326	0.1055
		0.9236	0.08714
		0.4961	0.06479
		0.5662	0.07293
		0.6995	0.08235
		0.4053	0.05498
		0.4022	0.05421
		IsoLine	IsoLine
[truncated: 56 more columns]

[truncated: 7 more sheets: PlotDat8, PlotDat10, PlotDat11, PlotDat13, PlotDat12, PlotDat16, zircon-standards]
